# Supplementary material for: Addition of allyl Grignard to nitriles in air and at room temperature: experimental and computational mechanistic insights in pH-switchable synthesis
Source: Royal Society of Chemistry journal article supplement (doi:10.1039/d3sc06403d), 2024-01-01
Supplement: d3sc06403d1.pdf [file d3sc06403d1.pdf]

## Supporting information for

### **Addition of Allyl Grignard to Nitriles Under Air and Room Temperature. Experimental and Computational Mechanistic Insights in pH-Switchable Synthesis**

Blanca Parra-Cadenas,<sup>a</sup> Israel Fernández,<sup>\*b</sup> Fernando Carrillo-Hermosilla,<sup>\*a</sup> Joaquín García-Álvarez<sup>\*c</sup> and David Elorriaga,<sup>\*d</sup>

<sup>a</sup> Departamento de Química Inorgánica, Orgánica y Bioquímica-Centro de Innovación en Química Avanzada (ORFEO-CINQA), Facultad de Ciencias y Tecnologías Químicas, Universidad de Castilla-La Mancha, 13071 Ciudad Real, Spain

<sup>b</sup> Departamento de Química Orgánica I and Centro de Innovación en Química Avanzada (ORFEO-CINQA), Facultad de Ciencias Químicas. Universidad Complutense de Madrid, 28040 Madrid, Spain

<sup>c</sup> Laboratorio de Química Sintética Sostenible (QuimSinSos), Departamento de Química Orgánica e Inorgánica, (IUQOEM), Centro de Innovación en Química Avanzada (ORFEO-CINQA), Facultad de Química, Universidad de Oviedo, E33071 Oviedo, Spain

<sup>d</sup> Group of Bioorganometallic Chemistry and Catalysis, Departamento de Química Orgánica e Inorgánica, Facultad de Química, Universidad de Oviedo, E33071 Oviedo, Spain

# Table of Contents

1. General Methods and Materials
2. Experimental procedures and characterisation details
  - 2.1 Procedure for the synthesis of tetrahydropyridines **2a-j**, in the presence of air and without additional solvent added.
  - 2.2 Procedure for the synthesis of enamines **Z/E-3a,d,e,f** in the presence of air and without additional solvent added.
  - 2.3 Procedure for the synthesis of **4a**, in the presence of air and without additional solvent added.
  - 2.4 Procedure for the synthesis of **5a-c,g,i,j** in the presence of air and without additional solvent added.
  - 2.5 Procedure for the synthesis of intermediated **I**.
3.  $^1\text{H}$  and  $^{13}\text{C}\{^1\text{H}\}$  spectra
4. Computational methods
5. References

## 1.- General Methods and Materials

All reagents were obtained from commercial suppliers and used without further purification. Allylmagnesium bromide (1M in diethyl ether) was purchased from Sigma Aldrich and its concentration was established by titration with *L*-menthol.<sup>1</sup>

Infrared spectra were recorded on a Bruker Tensor 27 spectrometer, using an ATR accessory.

NMR spectra were recorded on a Bruker Avance Neo 400 spectrometer operating at 400.13 MHz for <sup>1</sup>H, 100.62 MHz for <sup>13</sup>C and 376 MHz for <sup>19</sup>F. All <sup>13</sup>C and <sup>19</sup>F spectra were proton decoupled. <sup>1</sup>H and <sup>13</sup>C NMR spectra were referenced against the appropriate solvent signal. <sup>19</sup>F NMR spectra were referenced against CFC1<sub>3</sub>. Characterisation details, including <sup>1</sup>H, <sup>19</sup>F and <sup>13</sup>C{<sup>1</sup>H} NMR spectra, for compounds **2a-j**, **3a,d,e,f**, **4a** and **5a-c,g,i,j** are included in the following sections of this Supporting Information.

HRMS were measured in ESI mode, with a TOF mass analyser (Bruker model Impact II).

## 2.- Experimental procedure and characterisation details

### 2.1.- General procedure for the synthesis of tetrahydropyridines **2a-j**, in the presence of air and without additional solvent added

Syntheses were performed under air and at room temperature. A glass tube was charged with the appropriate nitrile (**1a-j**, 0.5 mmol) and allylmagnesium bromide (0.5 mmol) was added with a vigorous stirring. After 5 seconds of stirring, the reaction was quenched with 2 mL of a saturated solution of NH<sub>4</sub>Cl and then heated to 100 °C for 20 minutes. After reaching room temperature, 5 mL of distilled water were added, and the mixture was extracted with 2-MeTHF (3 x 5 mL). The combined organic phases were dried over anhydrous MgSO<sub>4</sub> and the solvent was concentrated in vacuo. Yields of the reaction crudes were determined by <sup>1</sup>H-NMR using 1,3,5-trimethoxybenzene as internal standard (0.5 mmol). All reactions were done in triplicate to ensure good reproducibility of obtained yields. Separation and purification of every compound were carried out using TLC glass plate silica (employing hexane:ethyl acetate mixtures). Isolated yields: **2a**, 94%, 67.1 mg; **2b**, 92%, 71.3 mg; **2c**, 93%, 80 mg; **2d**, 60%, 45.8 mg; **2e**, 89%, 88.4 mg; **2f**, 84%, 72.3 mg; **2g**, 86%, 61.1 mg; **2h**, 95%, 82.6 mg; **2i**, 93%, 69.9 mg; **2j**, 61%, 31.9 mg.

## **2.2.- Procedure for the synthesis of enamines *Z/E*-3a,d,e,f in the presence of air and without additional solvent added.**

Synthesis was performed under air and at room temperature. A glass tube was charged with the desired nitrile (**3a,d,e,f**, 0.5 mmol) and allylmagnesium bromide (0.5 mmol) was added with a vigorous stirring. After 3 seconds of stirring, the reaction was quenched with 2 mL of a commercial solution of NH<sub>3</sub>. After addition of NaCl, the reaction was extracted with 2-MeTHF (3 x 5 mL). The combined organic phases were dried over anhydrous MgSO<sub>4</sub> and the solvent was concentrated in vacuo to obtain mixtures of *Z/E*-**3a,d,e,f**. The yields of these mixtures were determined by <sup>1</sup>H-NMR using 1,3,5-trimethoxybenzene as internal standard (0.5 mmol). The reaction was done in triplicate to ensure good reproducibility of obtained yield.

## **2.3.- Procedure for the synthesis of 4a, in the presence of air and without additional solvent added.**

Synthesis was performed under air and at room temperature. A glass tube was charged with the benzonitrile (**1a**, 0.5 mmol) and allylmagnesium bromide (1 mmol) was added with a vigorous stirring. After 5 seconds of stirring, the reaction was quenched with 2 mL of a saturated solution of NH<sub>4</sub>Cl and then 5 mL of distilled water were added, and the reaction was extracted with 2-MeTHF (3 x 5 mL). The combined organic phases were dried over anhydrous MgSO<sub>4</sub> and the solvent was concentrated in vacuo. A 97% yield in the reaction crude was determined by <sup>1</sup>H-NMR using 1,3,5-trimethoxybenzene as internal standard (0.5 mmol). The reaction was done in triplicate to ensure good reproducibility of obtained yield. Separation and purification of **4a** were carried out using TLC glass plate silica (employing hexane:ethyl acetate mixtures). Isolated yield: 93%, 84.5 mg.

## **2.4.- Procedure for the synthesis of 5a-c,g,i,j, in the presence of air and without additional solvent added**

Syntheses were performed under air and at room temperature. A glass tube was charged with the desired nitrile (**1a-c,g,i,j**, 0.5 mmol) and allylmagnesium bromide (0.5 mmol) was added with a vigorous stirring. After 5 seconds of stirring, the reaction was quenched with 2 mL of a saturated solution of NH<sub>3</sub> and then heated to 100 °C for 20 minutes. After reaching room temperature, 5 mL of distilled water and NaCl were added,

and the reaction was extracted with 2-MeTHF (3 x 5 mL). The combined organic phases were dried over anhydrous MgSO<sub>4</sub> and the solvent was concentrated in vacuo. Yields were determined by <sup>1</sup>H-NMR using 1,3,5-trimethoxybenzene as internal standard (0.5 mmol). The reaction was done in triplicate to ensure good reproducibility of obtained yield. Isolated yields: **5a**, 99%, 80 mg; **5b**, 96%, 81.7 mg; **5c**, 98%, 92.8 mg; **5g**, 86%, 65.5 mg; **5i**, 99%, 82.9 mg; **5j**, 59%, 29.8 mg.

## 2.5.- Procedure for the synthesis of intermediated I.

Synthesis was performed under inert atmosphere and at room temperature inside de glovebox. A glass tube was charged with allylmagnesium bromide (0.5 mmol), and the solvent was removed under vacuum. Then, the white solid was dissolved in deuterated THF and transferred into a young NMR tube, and the benzonitrile (**1a**, 0.5 mmol) was added.

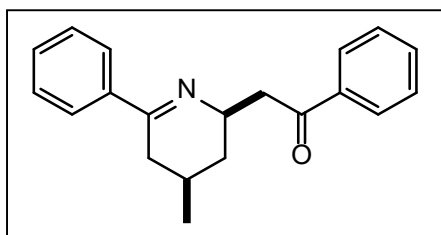

### 2-((2R,4R)-4-methyl-6-phenyl-2,3,4,5-tetrahydropyridin-2-yl)-1-phenylethanone (**2a**):

<sup>1</sup>H NMR (CDCl<sub>3</sub>) δ (ppm) = 0.91 (q, 1H, *J* = 11.9 Hz), 1.06 (d, 3H, *J* = 6.4 Hz), 1.91-2.11 (m, 3H), 2.80-2.88 (m, 1H), 3.08 (dd, 1H, *J* = 16.0, 8.4 Hz), 3.62 (dd, 1H, *J* = 16.0, 5.5 Hz), 4.25 (bs, 1H), 7.34-7.37 (m, 3Harom), 7.45-7.50 (m, 2Harom), 7.54-7.59 (m, 1Harom), 7.75-7.78 (m, 2Harom), 8.03-8.06 (m, 2Harom). <sup>13</sup>C{<sup>1</sup>H} NMR (CDCl<sub>3</sub>) δ (ppm) = 22.4, 26.7, 35.8, 36.9, 42.3, 57.5, 126.3, 128.3, 128.5, 128.7, 129.8, 133.0, 137.7, 139.9, 165.4, 199.9. FT-IR (cm<sup>-1</sup>) = 2925, 2358, 1718, 1684, 1599, 1560, 1491, 1450, 1420, 1373, 1316, 1266, 1215, 1181, 1103, 1073, 1027, 1003. HRMS: *m/z* 292.16 (M + H<sup>+</sup>).

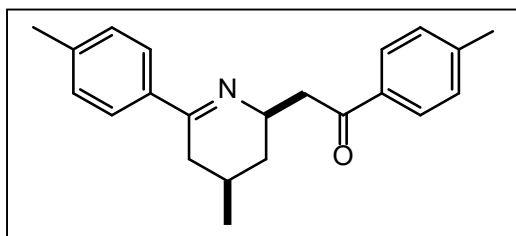

### 2-((2R,4R)-4-methyl-6-(p-tolyl)-2,3,4,5-tetrahydropyridin-2-yl)-1-(p-tolylethanone (**2b**):

<sup>1</sup>H NMR (CDCl<sub>3</sub>) δ (ppm) = 0.88 (q, 1H, *J* = 11.9 Hz), 1.04 (d, 3H, *J* = 6.3 Hz), 1.90-2.08 (m, 3H), 2.35 (s, 3H), 2.42 (s, 3H), 2.78-2.86 (m, 1H), 3.03 (dd, 1H, *J* = 15.9, 8.6 Hz), 3.59 (dd, 1H, *J* = 15.9, 5.3 Hz), 4.21 (bs, 1H), 7.15 (d, 2Harom, *J* = 8.0 Hz), 7.26 (d, 2Harom, *J* = 8.0 Hz), 7.66 (d, 2Harom, *J* = 8.0 Hz), 7.94 (d, 2Harom, *J* = 8.0 Hz). <sup>13</sup>C{<sup>1</sup>H} NMR (CDCl<sub>3</sub>) δ (ppm) = 21.4, 21.8, 22.4, 26.7, 35.8, 36.9, 47.2, 57.4, 126.3, 128.6, 129.0, 129.3, 135.3, 137.2,

139.8, 143.8, 165.3, 199.5. FT-IR ( $\text{cm}^{-1}$ ) = 2923, 2360, 1718, 1684, 1608, 1576, 1543, 1458, 1409, 1375, 1267, 12125, 1208, 1181, 1111, 1038, 1003. HRMS:  $m/z$  320.20 ( $M + H^+$ ).

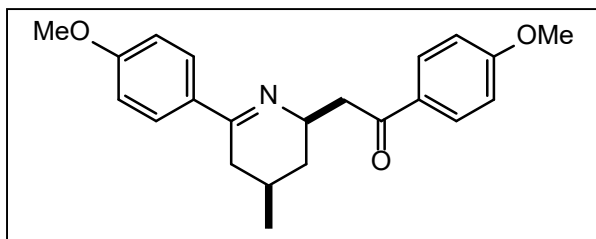

**1-(4-methoxyphenyl)-2-((2R,4R)-6-(4-methoxyphenyl)-4-methyl-2,3,4,5-tetrahydropyridin-2-yl)ethanone (2c):**  $^1\text{H}$  NMR ( $\text{CDCl}_3$ )  $\delta$  (ppm) = 0.87

(q, 1H,  $J = 11.9$  Hz), 1.04 (d, 3H,  $J = 6.5$  Hz), 1.86-2.05 (m, 3H), 2.78-2.84 (m, 1H), 3.00 (dd, 1H,  $J = 15.6, 8.5$  Hz), 3.59 (dd, 1H,  $J = 15.6, 5.4$  Hz), 3.82 (s, 3H), 3.87 (s, 3H), 4.19 (bs, 1H), 6.86 (d, 2Harom,  $J = 8.9$  Hz), 6.94 (d, 2Harom,  $J = 8.9$  Hz), 7.74 (d, 2Harom,  $J = 8.9$  Hz), 8.03 (d, 2Harom,  $J = 8.9$  Hz).  $^{13}\text{C}\{^1\text{H}\}$  NMR ( $\text{CDCl}_3$ )  $\delta$  (ppm) = 22.4, 26.8, 35.6, 37.0, 47.1, 55.4, 55.6, 57.5, 113.5, 113.8, 127.8, 130.8, 130.9, 132.6, 160.9, 163.5, 164.4, 198.4. FT-IR ( $\text{cm}^{-1}$ ) = 2924, 2839, 2365, 2034, 1671, 1598, 1575, 1509, 1457, 1418, 1370, 1308, 1251, 1160, 1111, 1029. HRMS:  $m/z$  352.19 ( $M + H^+$ ).

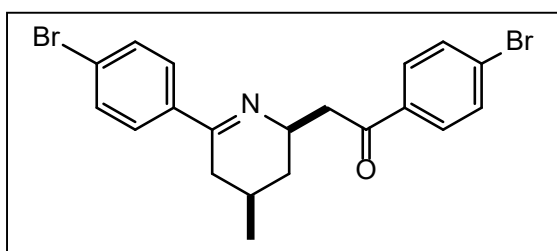

**1-(4-bromophenyl)-2-((2R,4R)-6-(4-bromophenyl)-4-methyl-2,3,4,5-tetrahydropyridin-2-yl)ethanone (2d):**  $^1\text{H}$  NMR ( $\text{CDCl}_3$ )  $\delta$  (ppm) = 0.90 (q, 1H,  $J = 11.9$  Hz), 1.05 (d, 3H,  $J = 6.5$  Hz), 1.86-2.03 (m, 3H), 2.74-2.79 (m, 1H), 3.02 (dd,

1H,  $J = 15.8, 7.7$  Hz), 3.48 (dd, 1H,  $J = 15.8, 6.1$  Hz), 4.19 (bs, 1H), 7.45 (d, 2Harom,  $J = 8.6$  Hz), 7.58-7.61 (m, 4Harom), 7.87 (d, 2Harom,  $J = 8.6$  Hz).  $^{13}\text{C}\{^1\text{H}\}$  NMR ( $\text{CDCl}_3$ )  $\delta$  (ppm) = 22.3, 26.6, 35.4, 36.7, 46.8, 57.6, 124.2, 127.9, 128.2, 130.0, 131.3, 131.9, 136.4, 138.4, 164.2, 198.7. FT-IR ( $\text{cm}^{-1}$ ) = 2921, 2852, 2232, 1919, 1684, 1635, 1586, 1485, 1458, 1397, 1372, 1320, 1266, 1204, 1178, 1071, 1010. HRMS:  $m/z$  447.99 ( $M + H^+$ ).

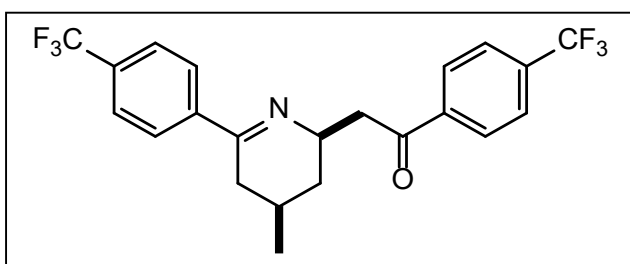

**2-((2R,4R)-4-methyl-6-(4-(trifluoromethyl)phenyl)-2,3,4,5-tetrahydropyridin-2-yl)-1-(4-(trifluoromethyl)phenyl)ethanone (2e):**  $^1\text{H}$  NMR ( $\text{CDCl}_3$ )  $\delta$  (ppm) =

0.93-1.00 (m, 1H), 1.09 (d, 3H,  $J = 6.5$  Hz), 1.25-1.28 (m, 1H), 2.03-2.11 (m, 2H), 2.80-2.85 (m, 1H), 3.12 (dd, 1H,  $J = 15.9, 7.5$  Hz), 3.56 (dd, 1H,  $J = 15.9, 6.3$  Hz), 4.27 (bs, 1H), 7.58 (d, 2Harom.  $J = 8.2$  Hz), 7.74 (d, 2Harom.  $J = 8.2$  Hz), 7.82 (d, 2Harom.  $J = 8.2$  Hz), 8.12 (d, 2Harom.  $J = 8.1$  Hz).  $^{13}\text{C}\{^1\text{H}\}$  NMR ( $\text{CDCl}_3$ )  $\delta$  (ppm) = 22.3, 26.7, 35.7, 36.7, 47.1, 57.8, 125.3, 125.8, 126.6, 128.8, 131.5, 131.7, 134.4, 134.6, 140.0, 142.7, 164.5, 198.9.  $^{19}\text{F}$  NMR ( $\text{CDCl}_3$ )  $\delta$  (ppm) = -63.1, -62.7. FT-IR ( $\text{cm}^{-1}$ ) = 2960, 2853, 1688, 1410, 1322, 1262, 1164, 1121, 1109, 1064, 1015, 831, 773, 704. HRMS:  $m/z$  428.14 ( $\text{M} + \text{H}^+$ ).

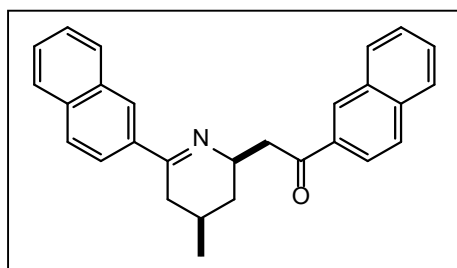

**2-((2R,4R)-4-methyl-6-(naphthalen-2-yl)-2,3,4,5-tetrahydropyridin-2-yl)-1-(naphthalen-2-yl)ethanone (2f):**  $^1\text{H}$  NMR ( $\text{CDCl}_3$ )  $\delta$  (ppm) = 1.02 (q, 1H,  $J = 11.7$  Hz), 1.12 (d, 3H,  $J = 6.5$  Hz), 1.98, (bs, 1H), 2.10-2.23 (m, 2H), 2.98-3.03 (m, 1H), 3.25 (dd, 1H,  $J = 15.6, 8.2$  Hz), 3.80 (dd, 1H,

$J = 15.6, 5.8$  Hz), 4.38 (bs, 1H), 7.47-7.63 (m, 4Harom), 7.75-8.16 (m, 9Harom), 8.63 (s, 1Harom).  $^{13}\text{C}\{^1\text{H}\}$  NMR ( $\text{CDCl}_3$ )  $\delta$  (ppm) = 22.4, 26.8, 35.7, 37.0, 47.3, 58.0, 124.0, 124.3, 126.1, 126.2, 126.7, 126.8, 127.7, 127.9, 128.5, 128.8, 129.8, 130.4, 132.7, 133.1, 134.2, 134.3, 135.1, 135.7, 137.1 (2C), 165.1, 199.9. FT-IR ( $\text{cm}^{-1}$ ) = 2939, 2921, 2866, 2226, 1671, 1624, 1596, 1541, 1506, 1468, 1361, 1318, 1274, 1208, 1182, 1123, 1100, 1043, 1013. HRMS:  $m/z$  392.20 ( $\text{M} + \text{H}^+$ ).

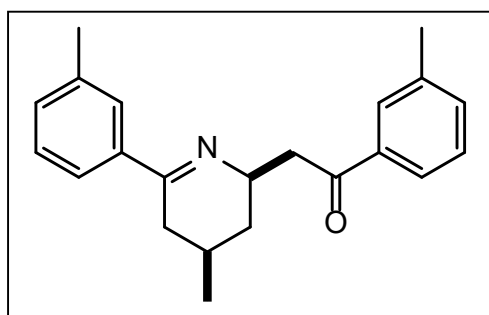

**2-((2R,4R)-4-methyl-6-(*m*-tolyl)-2,3,4,5-tetrahydropyridin-2-yl)-1-(*m*-tolyl)ethanone (2g):**  $^1\text{H}$  NMR ( $\text{CDCl}_3$ )  $\delta$  (ppm) = 0.90 (m, 1H), 1.06 (d, 3H,  $J = 6.5$  Hz), 2.03-2.07 (m, 3H), 2.37 (s, 3H), 2.43 (s, 3H), 2.83-2.87 (m, 1H), 3.08 (dd, 1H,  $J = 15.9, 8.6$  Hz), 3.64 (dd, 1H,  $J = 15.9, 5.2$  Hz), 4.24 (bs, 1H), 7.19-7.21 (m, 1Harom), 7.25-

7.28 (m, 1Harom), 7.36-7.40 (m, 2Harom), 7.55-7.60 (m, 2Harom), 7.85-7.88 (m, 2Harom).  $^{13}\text{C}\{^1\text{H}\}$  NMR ( $\text{CDCl}_3$ )  $\delta$  (ppm) = 21.5, 22.4, 26.7, 29.9, 35.9, 36.9, 47.4, 57.6, 123.5, 125.6, 125.7, 127.0, 128.2, 128.5, 129.1, 130.5, 133.8, 137.8, 137.9, 138.4, 165.7, 200.1. FT-IR ( $\text{cm}^{-1}$ ) = 2924, 2854, 1680, 1603, 1585, 1456, 1364, 1271, 1184, 1081, 968, 893, 785, 747, 690. HRMS:  $m/z$  320.20 ( $\text{M} + \text{H}^+$ ).

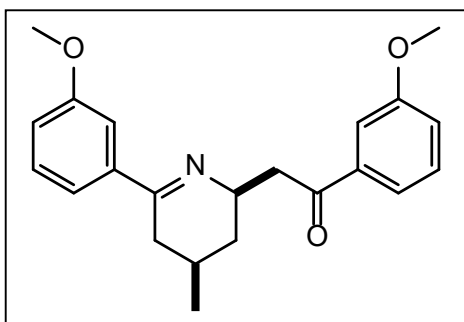

**1-(3-methoxyphenyl)-2-((2R,4R)-6-(3-methoxyphenyl)-4-methyl-2,3,4,5-tetrahydropyridin-2-yl)ethanone (2h):**  $^1\text{H}$  NMR ( $\text{CDCl}_3$ )  $\delta$  (ppm) = 0.86-0.93 (m, 1H), 1.04 (d, 3H,  $J = 6.5$  Hz), 1.25-1.28 (m, 1H), 2.00-2.04 (m, 2H), 2.78-2.83 (m, 2H), 3.04 (dd, 1H,  $J = 15.8, 8.3$  Hz), 3.58 (dd, 1H,  $J = 15.8, 5.7$  Hz), 3.76 (s, 3H), 3.84

(s, 3H), 4.23 (bs, 1H), 6.90-6.92 (m, 1Harom), 7.09-7.11 (m, 1Harom), 7.23-7.25 (m, 1Harom), 7.30-7.32 (m, 1Harom), 7.34-7.38 (m, 2Harom), 7.55-7.56 (m, 1Harom), 7.61-7.63 (m, 1Harom).  $^{13}\text{C}\{^1\text{H}\}$  NMR ( $\text{CDCl}_3$ )  $\delta$  (ppm) = 22.4, 26.8, 35.9, 36.9, 47.3, 55.4, 55.6, 57.8, 111.2, 112.6, 116.0, 118.9, 119.6, 121.2, 129.3, 129.6, 139.2, 141.3, 159.7, 160.0, 165.2, 199.8. FT-IR ( $\text{cm}^{-1}$ ) = 2927, 2855, 1682, 1583, 1487, 1455, 1431, 1259, 1040, 877, 785, 759, 687. HRMS:  $m/z$  352.19 ( $\text{M} + \text{H}^+$ ).

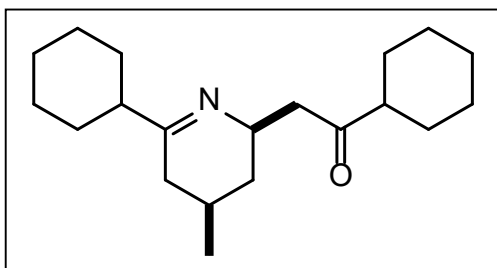

**1-cyclohexyl-2-((6-cyclohexyl-4-methyl-2,3,4,5-tetrahydropyridin-2-yl)ethanone (2i):**  $^1\text{H}$  NMR ( $\text{CDCl}_3$ )  $\delta$  (ppm) = 0.57-0.64 (m, 1H), 0.88 (d, 3H,  $J = 6.5$  Hz), 1.15-1.33 (m, 11H), 1.50-1.54 (m, 1H), 1.62-1.83 (m, 11H), 1.99-2.03 (m, 1H), 2.18-2.23 (m, 1H), 2.34-2.39 (m,

1H), 2.45 (dd, 1H,  $J = 15.9, 8.6$  Hz), 2.84 (dd, 1H,  $J = 15.9, 5.2$  Hz), 3.75 (bs, 1H).  $^{13}\text{C}\{^1\text{H}\}$  NMR ( $\text{CDCl}_3$ )  $\delta$  (ppm) = 22.2, 25.7, 25.8, 26.0, 26.2, 26.3 (2C), 26.4, 28.3, 28.4, 30.3, 30.6, 35.6, 37.1, 48.9, 49.2, 51.6, 56.3, 174.4, 213.7. FT-IR ( $\text{cm}^{-1}$ ) = 2926, 2853, 1703, 1449, 1373, 1144, 1000, 950, 893. HRMS:  $m/z$  304.26 ( $\text{M} + \text{H}^+$ ).

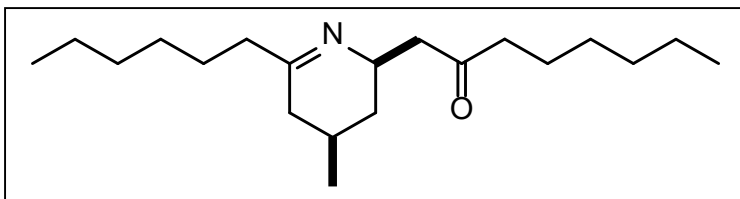

**1-(6-hexyl-4-methyl-2,3,4,5-tetrahydropyridin-2-yl)octan-2-one (2j):**  $^1\text{H}$  NMR ( $\text{CDCl}_3$ )  $\delta$  (ppm) = 0.66-0.73 (m, 1H), 0.88 (t,

6H,  $J = 6.9$  Hz), 0.92 (d, 3H,  $J = 6.4$  Hz), 1.15-1.20 (m, 1H), 1.24-1.31 (m, 12H), 1.54-1.60 (m, 4H), 1.80-1.83 (m, 1H), 2.12-2.16 (m, 2H), 2.22-2.26 (m, 1H), 2.38-2.50 (m, 4H), 2.83 (dd, 1H,  $J = 15.8, 5.5$  Hz), 3.78 (bs, 1H).  $^{13}\text{C}\{^1\text{H}\}$  NMR ( $\text{CDCl}_3$ )  $\delta$  (ppm) = 14.0, 14.1, 22.1, 22.6, 22.7, 23.5, 26.4, 26.5, 29.8, 31.5, 31.6, 31.8, 36.8, 37.9, 40.7, 44.1,



50.8, 56.2, 171.9, 210.9. FT-IR ( $\text{cm}^{-1}$ ) = 2955, 2928, 2871, 1711, 1652, 1458, 1375, 728.  
HRMS:  $m/z$  308.29 ( $M + H^+$ ).

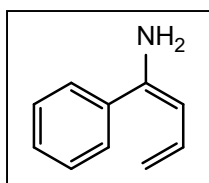

**(E)-1-phenylbuta-1,3-dien-1-amine (E-3a):**  $^1\text{H}$  NMR ( $\text{CDCl}_3$ )  $\delta$  (ppm) = 3.76 (bs, 2H), 4.94 (ddd, 1H,  $J = 10.3, 1.9, 0.8$  Hz), 5.14 (ddd, 1H,  $J = 16.6, 1.9, 0.8$  Hz), 5.47 (d, 1H,  $J = 11.2$  Hz), 6.56 (ddd, 1H,  $J = 16.6, 11.2, 10.3$  Hz), 7.32-7.35 (m, 3Harom), 7.53-7.55 (m, 2Harom)

$^{13}\text{C}\{^1\text{H}\}$  NMR ( $\text{CDCl}_3$ )  $\delta$  (ppm) = 102.9, 112.1, 125.8, 128.4, 128.5, 128.6, 131.2, 139.4, 142.7.

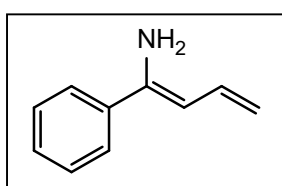

**(Z)-1-phenylbuta-1,3-dien-1-amine (Z-3a):**  $^1\text{H}$  NMR ( $\text{CDCl}_3$ )  $\delta$  (ppm) = 3.51 (bs, 2H), 4.63 (ddd, 1H,  $J = 10.2, 2.2, 0.8$  Hz), 5.14 (ddd, 1H,  $J = 16.7, 2.2, 0.8$  Hz), 5.54 (d, 1H,  $J = 11.0$  Hz), 6.33 (ddd, 1H,  $J = 16.7, 11.0, 10.2$  Hz), 7.29-7.46 (m, 5Harom).

$^{13}\text{C}\{^1\text{H}\}$  NMR ( $\text{CDCl}_3$ )  $\delta$  (ppm) = 104.1, 108.9, 126.4, 128.3, 128.4, 128.9, 138.5, 141.1.

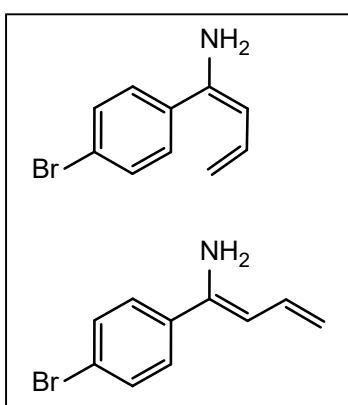

**(E)-1-(4-bromophenyl)buta-1,3-dien-1-amine (E-3d); (Z)-1-(4-bromophenyl)buta-1,3-dien-1-amine (Z-3d):**  $^1\text{H}$  NMR ( $\text{CDCl}_3$ )  $\delta$  (ppm) major isomer (*E*) = 3.63 (bs, 2H), 4.87-4.89 (ddd, 1H,  $J = 10.3, 1.9, 0.8$  Hz), 5.05-5.09 (ddd, 1H,  $J = 16.6, 1.9, 0.8$  Hz), 5.35 (d, 1H,  $J = 11.2$  Hz), 6.40-6.48 (m, 1H), 7.30-7.32 (m, 2H), 7.36-7.38 (m, 2H).

$^{13}\text{C}\{^1\text{H}\}$  NMR ( $\text{CDCl}_3$ )  $\delta$  (ppm) mix of isomers (*E* and *Z*) = 103.4, 112.7, 119.1, 127.7, 127.8, 127.9, 128.2, 129.9,

131.2, 131.3, 131.5, 131.6, 131.9, 133.5. FT-IR ( $\text{cm}^{-1}$ ) = 3067, 2923, 1912, 1681, 1633, 1584, 1484, 1395, 1205, 1176, 1070, 1007, 909, 816, 731. HRMS:  $m/z$  224.01 ( $M + H^+$ ).

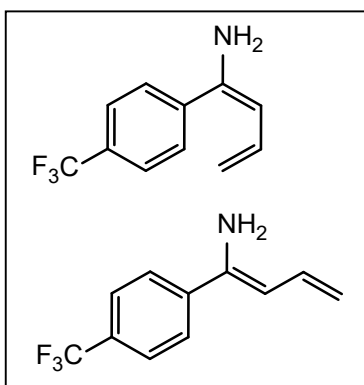

**(E)-1-(4-(trifluoromethyl)phenyl)buta-1,3-dien-1-amine (E-3e); (Z)-1-(4-(trifluoromethyl)phenyl)buta-1,3-dien-1-amine (Z-3e):**  $^1\text{H}$  NMR ( $\text{CDCl}_3$ )  $\delta$  (ppm) major isomer (*E*) = 3.67 (bs, 2H), 4.91-4.94 (ddd, 1H,  $J = 10.3, 1.8, 0.8$  Hz), 5.09-5.13 (ddd, 1H,  $J = 16.6, 1.8, 0.8$  Hz), 5.43 (d, 1H,  $J = 11.2$  Hz), 6.43-6.50 (m, 1H), 7.49-7.51 (m, 2H), 7.54-7.59 (m, 2H).  $^{13}\text{C}\{^1\text{H}\}$  NMR ( $\text{CDCl}_3$ )  $\delta$  (ppm) mix of isomers (*E* and *Z*) = 119.4, 125.2, 125.2,

125.3, 125.3, 125.4, 125.7, 125.8, 126.5, 126.6, 128.8, 133.3, 140.4, 142.7, 164.5, 198.9.  
 $^{19}\text{F}$  NMR ( $\text{CDCl}_3$ )  $\delta$  (ppm) mix of isomers (*E* and *Z*) = -62.6 (*E*), -62.9 (*Z*). FT-IR ( $\text{cm}^{-1}$ )  
 = 2928, 1687, 1409, 1321, 1163, 1119, 1065, 1015, 834. HRMS:  $m/z$  214.08 ( $\text{M} + \text{H}^+$ ).

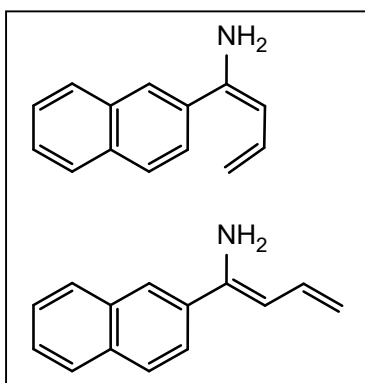

**(*E*)-1-(naphthalen-2-yl)buta-1,3-dien-1-amine (*E*-3f);**

**(*Z*)-1-(naphthalen-2-yl)buta-1,3-dien-1-amine (*Z*-3f):**

$^1\text{H}$  NMR ( $\text{CDCl}_3$ )  $\delta$  (ppm) major isomer (*E*)= 3.68 (bs, 2H), 4.81-4.83 (ddd, 1H,  $J = 10.3, 1.9, 0.8$  Hz), 5.02-5.06 (ddd, 1H,  $J = 16.6, 1.9, 0.8$  Hz), 5.47 (d, 1H,  $J = 11.2$  Hz), 6.40-6.48 (m, 1H), 7.26-7.29 (m, 2H), 7.46-7.48 (dd, 1H,  $J = 8.6, 1.9$  Hz), 7.58-7.63 (m, 3H), 7.79 (m, 1H).  $^{13}\text{C}\{^1\text{H}\}$

NMR ( $\text{CDCl}_3$ )  $\delta$  (ppm) mix of isomers (*E* and *Z*) = 109.4,

118.8, 119.3, 124.0, 124.2, 124.4, 125.7, 126.0, 126.2, 126.7, 126.8, 127.5, 127.6, 127.7, 127.8, 128.2, 128.4, 128.5, 128.8, 129.7, 130.3, 132.6, 133.9, 135.1, 135.6. FT-IR ( $\text{cm}^{-1}$ )  
 = 3296, 3057, 2923, 2226, 1924, 1675, 1626, 1597, 1504, 1468, 1370, 1275, 1184, 1124, 907, 858, 818, 745, 730. HRMS:  $m/z$  196.11 ( $\text{M} + \text{H}^+$ ).

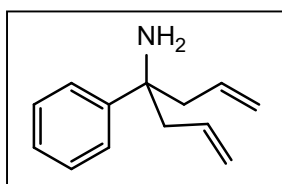

**4-phenylhepta-1,6-dien-4-amine (4a):**  $^1\text{H}$  NMR ( $\text{CDCl}_3$ )  $\delta$  (ppm) = 1.56 (bs, 2H), 2.42 (dd, 2H,  $J = 13.6, 8.5$  Hz), 2.65 (dd, 2H,  $J = 13.6, 6.1$ ), 5.02-5.10 (m, 4H), 5.47-5.57 (m, 2H), 7.20-7.24 (m, 1Harom), 7.32-7.36 (m, 2Harom), 7.42-7.44 (m,

2Harom).  $^{13}\text{C}\{^1\text{H}\}$  NMR ( $\text{CDCl}_3$ )  $\delta$  (ppm) = 48.2, 57.0, 118.7, 125.9, 126.3, 128.2, 134.0, 146.8. FT-IR ( $\text{cm}^{-1}$ ) = 3370, 3075, 3025, 2977, 2910, 1664, 1638, 1600, 1494, 1445, 1415, 1260, 1075, 1001. HRMS:  $m/z$  188.14 ( $\text{M} + \text{H}^+$ ).

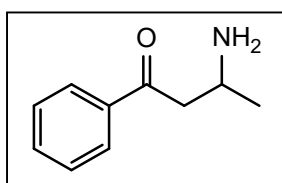

**4-phenylhepta-1,6-dien-4-amine (5a):**  $^1\text{H}$  NMR ( $\text{CDCl}_3$ )  $\delta$  (ppm) = 1.18 (d, 3H,  $J = 6.4$  Hz), 1.76 (bs, 1H), 2.95-3.07 (m, 2H), 3.58-3.62 (m, 1H), 7.44-7.47 (m, 2Harom), 7.54-7.56 (m, 1Harom), 7.94-7.96 (m, 2Harom).  $^{13}\text{C}\{^1\text{H}\}$  NMR ( $\text{CDCl}_3$ )  $\delta$

(ppm) = 23.9, 43.5, 48.3, 128.1, 128.7, 133.3, 137.2, 199.83. FT-IR ( $\text{cm}^{-1}$ ) = 3445, 3061, 2965, 2925, 2336, 2228, 2683, 1597, 1558, 1491, 1447, 1359, 1266, 1214, 1181, 1154, 1068, 1025, 1003. HRMS:  $m/z$  164.10 ( $\text{M} + \text{H}^+$ ).

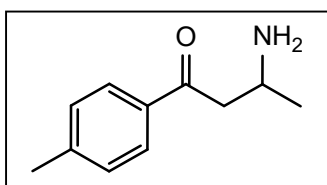

**3-amino-1-(*p*-tolyl)butan-1-one (5b):**  $^1\text{H}$  NMR ( $\text{CDCl}_3$ )  $\delta$  (ppm) = 1.09 (d, 3H,  $J$  = 6.4 Hz), 1.50 (bs, 2H), 2.32 (s, 3H), 2.83-2.96 (m, 2H), 3.48-3.52 (m, 1H).  $^{13}\text{C}\{^1\text{H}\}$  NMR ( $\text{CDCl}_3$ )  $\delta$  (ppm) = 21.7, 23.9, 43.6, 48.2, 128.3 (2C), 128.9, 129.4 (2C), 129.9, 199.4. FT-IR ( $\text{cm}^{-1}$ ) = 3425, 2922, 2227, 1679, 1645, 1605, 1571, 1509, 1373, 1225, 1204, 1181, 915, 813, 721. HRMS:  $m/z$  178.12 ( $\text{M} + \text{H}^+$ ).

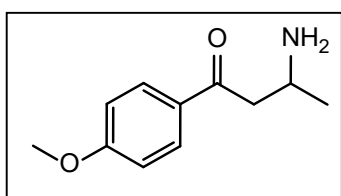

**3-amino-1-(4-methoxyphenyl)butan-1-one (5c):**  $^1\text{H}$  NMR ( $\text{CDCl}_3$ )  $\delta$  (ppm) = 1.06 (d, 3H,  $J$  = 6.5 Hz), 1.45 (bs, 2H), 2.77-2.90 (m, 2H), 3.44-3.48 (m, 1H), 3.73 (s, 3H), 6.81 (d, 2H,  $J$  = 8.9 Hz), 7.82 (d, 2H,  $J$  = 9.0 Hz).  $^{13}\text{C}\{^1\text{H}\}$  NMR ( $\text{CDCl}_3$ )  $\delta$  (ppm) = 23.7, 43.4, 47.8, 55.3, 113.6 (2C), 127.4, 130.2 (2C), 163.4, 198.0. FT-IR ( $\text{cm}^{-1}$ ) = 3413, 2961, 2838, 2048, 1672, 1598, 1509, 1458, 1418, 1358, 1305, 1251, 1170, 1076, 1028, 830. HRMS:  $m/z$  194.11 ( $\text{M} + \text{H}^+$ ).

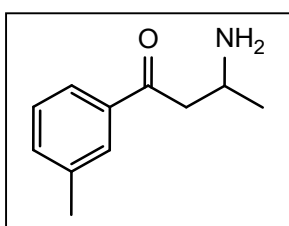

**3-amino-1-(*m*-tolyl)butan-1-one (5g):**  $^1\text{H}$  NMR ( $\text{CDCl}_3$ )  $\delta$  (ppm) = 1.18 (d, 3H,  $J$  = 6.4 Hz), 1.60 (bs, 2H), 2.41 (s, 3H), 2.93-3.06 (m, 2H), 3.56-3.61 (m, 1H), 7.35 (s, 1H), 7.74-7.77 (m, 3H).  $^{13}\text{C}\{^1\text{H}\}$  NMR ( $\text{CDCl}_3$ )  $\delta$  (ppm) = 21.5, 29.9, 43.6, 48.4, 125.4, 128.6, 128.7, 134.1, 137.3, 138.6, 200.1. FT-IR ( $\text{cm}^{-1}$ ) = 3446, 2959, 2923, 2854, 1680, 1650, 1602, 1584, 1454, 1374, 1285, 1244, 1163, 1081, 891, 785, 704. HRMS:  $m/z$  178.12 ( $\text{M} + \text{H}^+$ ).

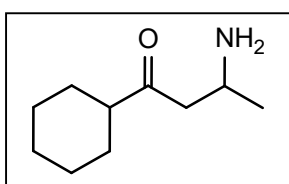

**3-amino-1-cyclohexylbutan-1-one (5i):**  $^1\text{H}$  NMR ( $\text{CDCl}_3$ )  $\delta$  (ppm) = 1.05 (d, 3H,  $J$  = 6.4 Hz), 1.23-1.28 (m, 6H), 1.45 (bs, 2H), 1.63-1.66 (m, 1H), 1.74-1.83 (m, 4H), 2.39-2.52 (m, 2H), 3.35-3.42 (m, 1H).  $^{13}\text{C}\{^1\text{H}\}$  NMR ( $\text{CDCl}_3$ )  $\delta$  (ppm) = 23.8, 25.8 (2C), 25.9, 28.4, 28.5, 43.0, 50.2, 51.3, 214.0. FT-IR ( $\text{cm}^{-1}$ ) = 2927, 2853, 1703, 1448, 1373, 1145, 1003, 893. HRMS:  $m/z$  170.15 ( $\text{M} + \text{H}^+$ ).

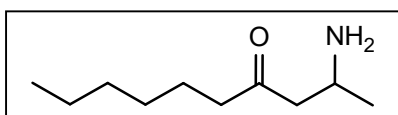

**2-aminodecan-4-one (5j):**  $^1\text{H}$  NMR ( $\text{CDCl}_3$ )  $\delta$  (ppm) = 0.86-0.90 (m, 6H), 1.04-1.05 (m, 2H), 1.25-1.32 (m, 8H), 1.52-1.57 (m, 2H), 2.35-2.39 (m, 2H), 3.14-3.22 (m, 1H).  $^{13}\text{C}\{^1\text{H}\}$  NMR ( $\text{CDCl}_3$ )  $\delta$  (ppm) = 14.1, 14.2, 20.5, 21.6, 22.6, 23.5, 26.7, 29.8, 31.5, 210.9. FT-IR ( $\text{cm}^{-1}$ ) = 3276, 2956, 2929, 2859, 1696, 1458, 1376, 1157, 1055, 728. HRMS:  $m/z$  171.18 ( $\text{M} + \text{H}^+$ ).

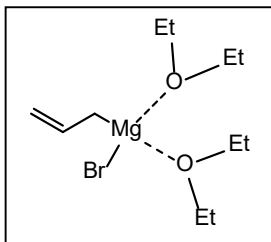

**Allylmagnesium bromide bis(ethyl ether)ate:**  $^1\text{H}$  NMR (THF- $d_8$ )  $\delta$  (ppm) = 1.10 (t, 12H,  $J$  = 7.0 Hz), 2.36 (d, 4H,  $J$  = 11.3Hz), 3.37 (q, 8H,  $J$  = 7.0 Hz), 6.25 (p, 1H,  $J$  = 11.3Hz).  $^{13}\text{C}\{^1\text{H}\}$  NMR (THF- $d_8$ )  $\delta$  (ppm) = 26.4, 57.3, 68.4, 149.7.

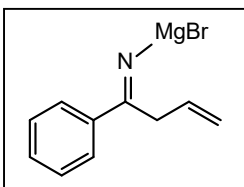

**Magnesium (1-phenylbut-3-en-1-ylidene)amide bromide (I):**  $^1\text{H}$  NMR (THF- $d_8$ )  $\delta$  (ppm) = 3.58 (d, 2H,  $J$  = 7.2 Hz), 4.95-4.98 (m, 1H), 5.88-5.96 (m, 1H), 7.28-7.34 (m, 3Harom), 7.73-7.75 (m, 2Harom).  $^{13}\text{C}\{^1\text{H}\}$  NMR (THF- $d_8$ )  $\delta$  (ppm) = 50.1, 117.4, 127.5, 129.0, 130.2, 133.0, 173.6.

### 3.- $^1\text{H}$ and $^{13}\text{C}\{^1\text{H}\}$ spectra

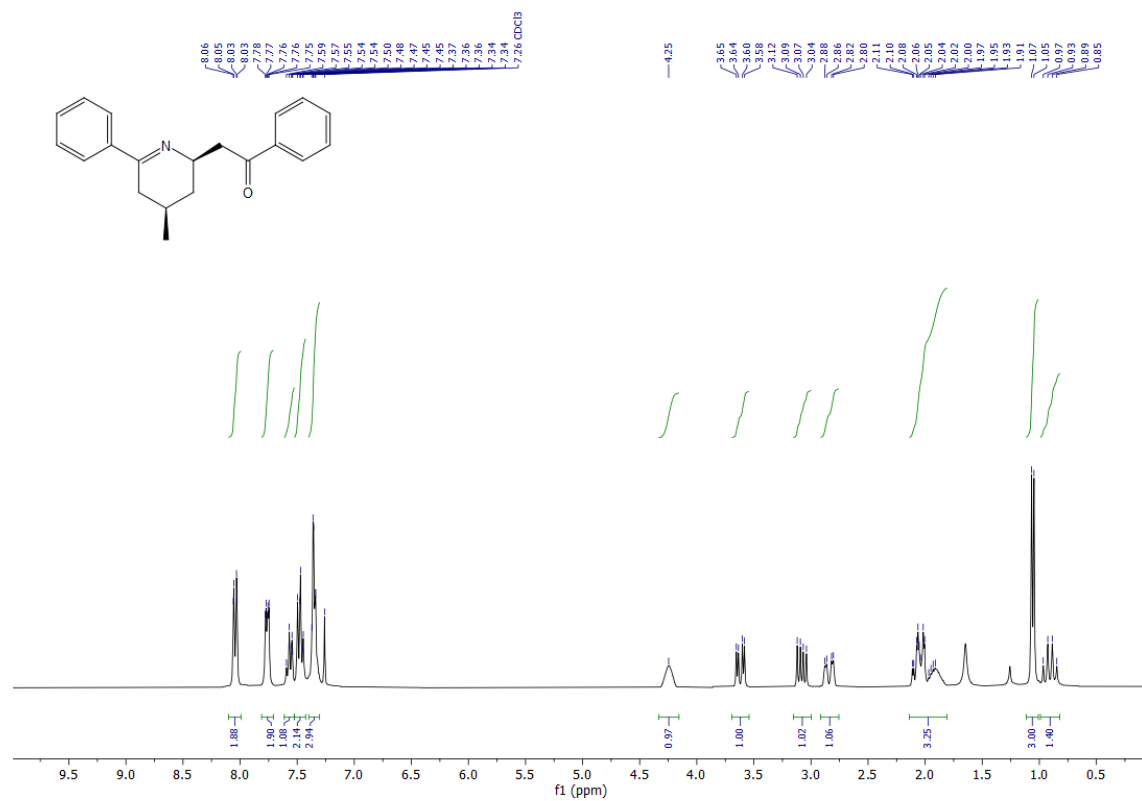

**Figure 1.**  $^1\text{H}$ -NMR full chart for **2a** in  $\text{CDCl}_3$ .

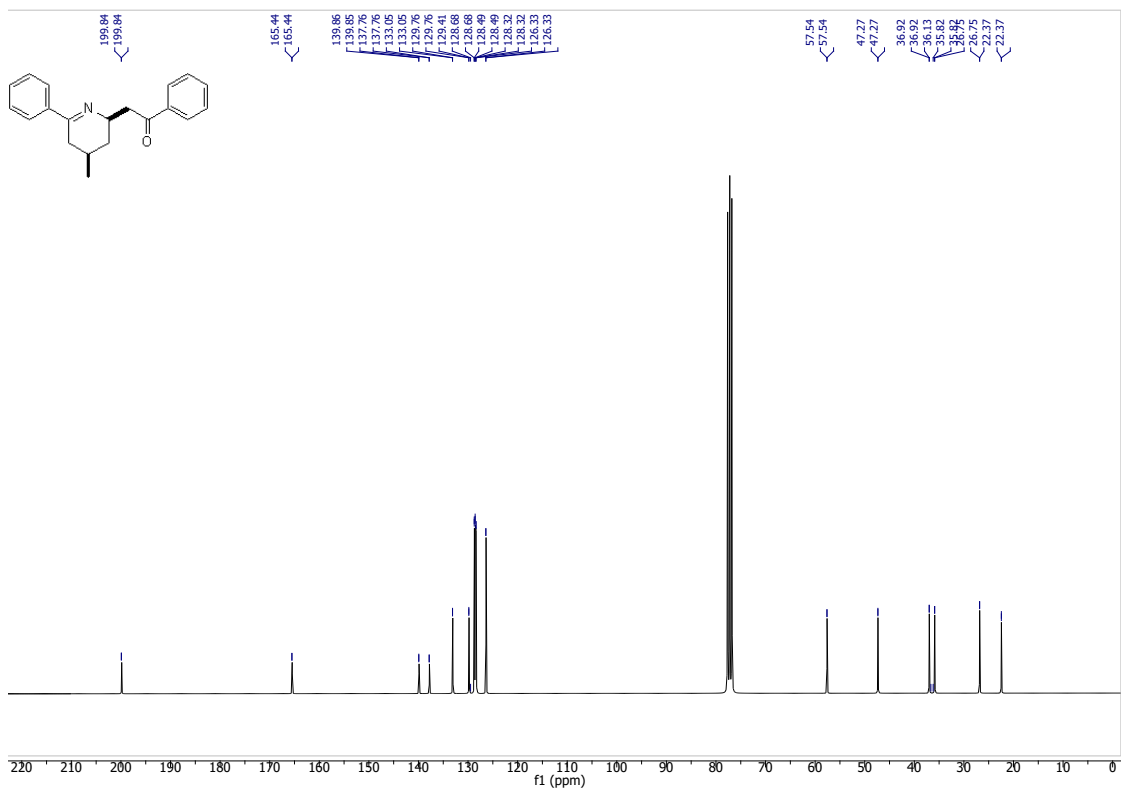

**Figure 2.** <sup>13</sup>C-NMR full chart for **2a** in CDCl<sub>3</sub>.

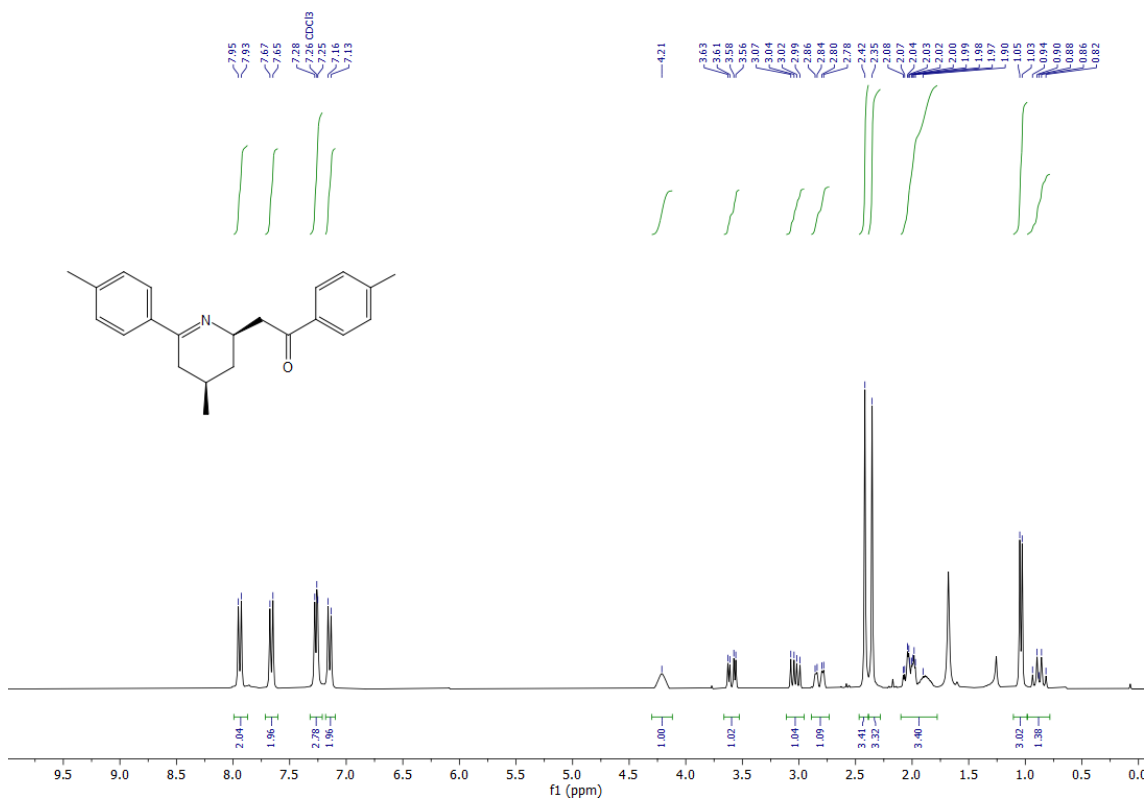

**Figure 3.** <sup>1</sup>H-NMR full chart for **2b** in CDCl<sub>3</sub>.

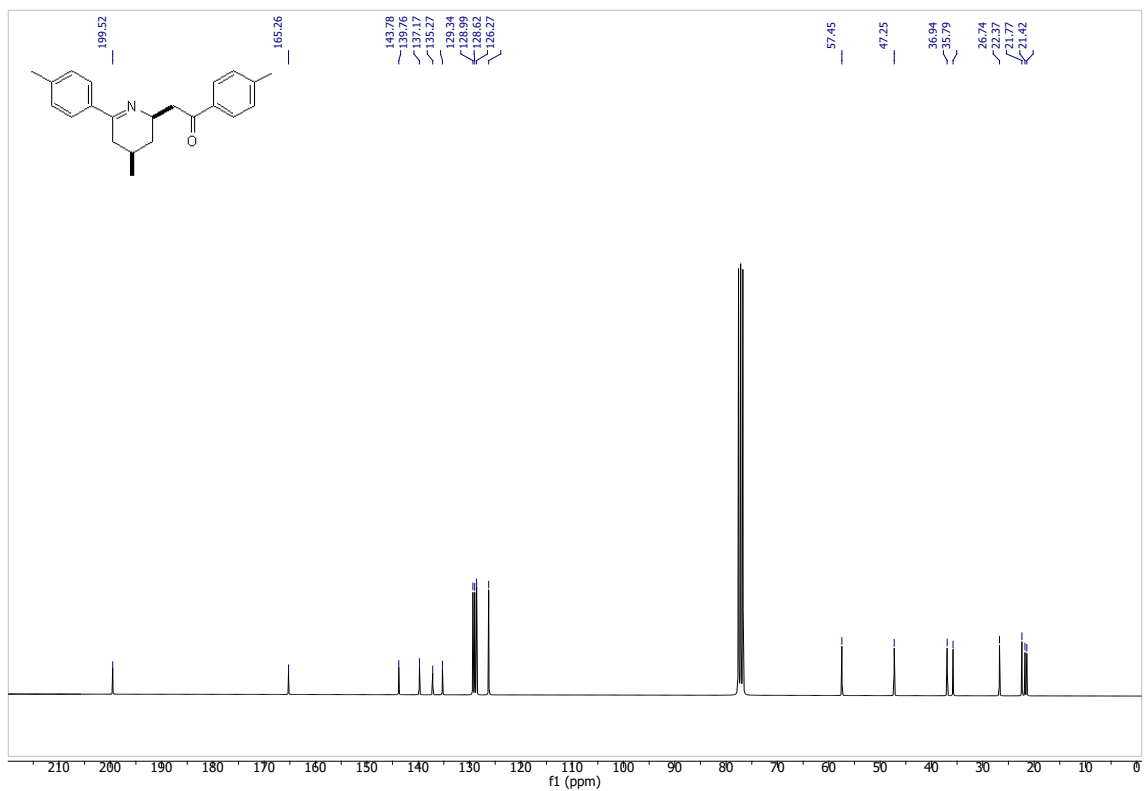

Figure 4. <sup>13</sup>C-NMR full chart for **2b** in CDCl<sub>3</sub>.

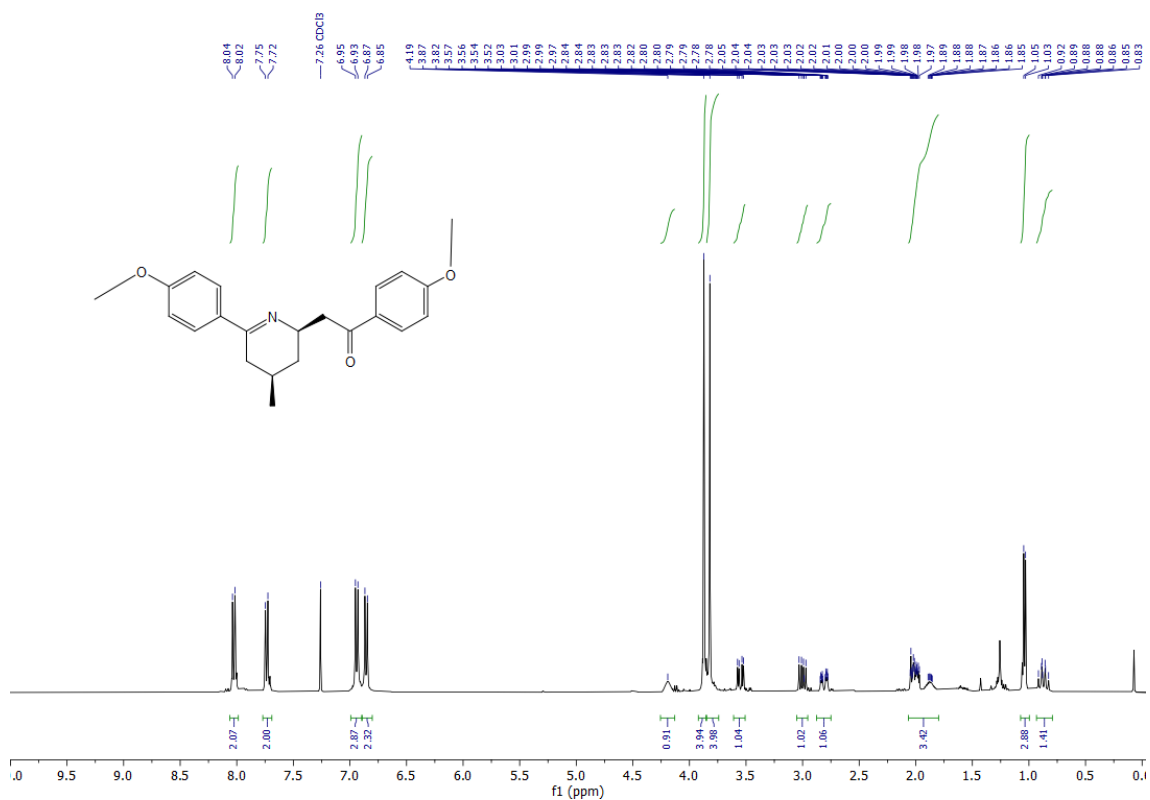

Figure 5. <sup>1</sup>H-NMR full chart for **2c** in CDCl<sub>3</sub>.

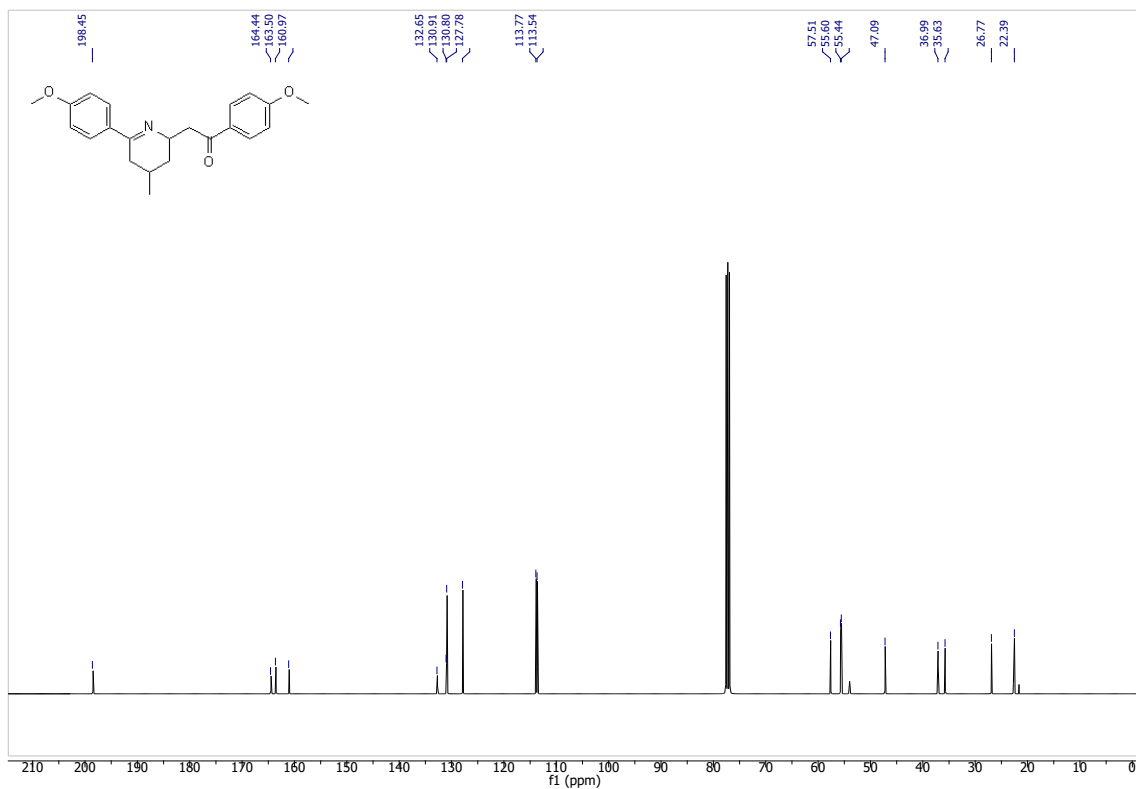

Figure 6.  $^{13}\text{C}$ -NMR full chart for **2c** in  $\text{CDCl}_3$ .

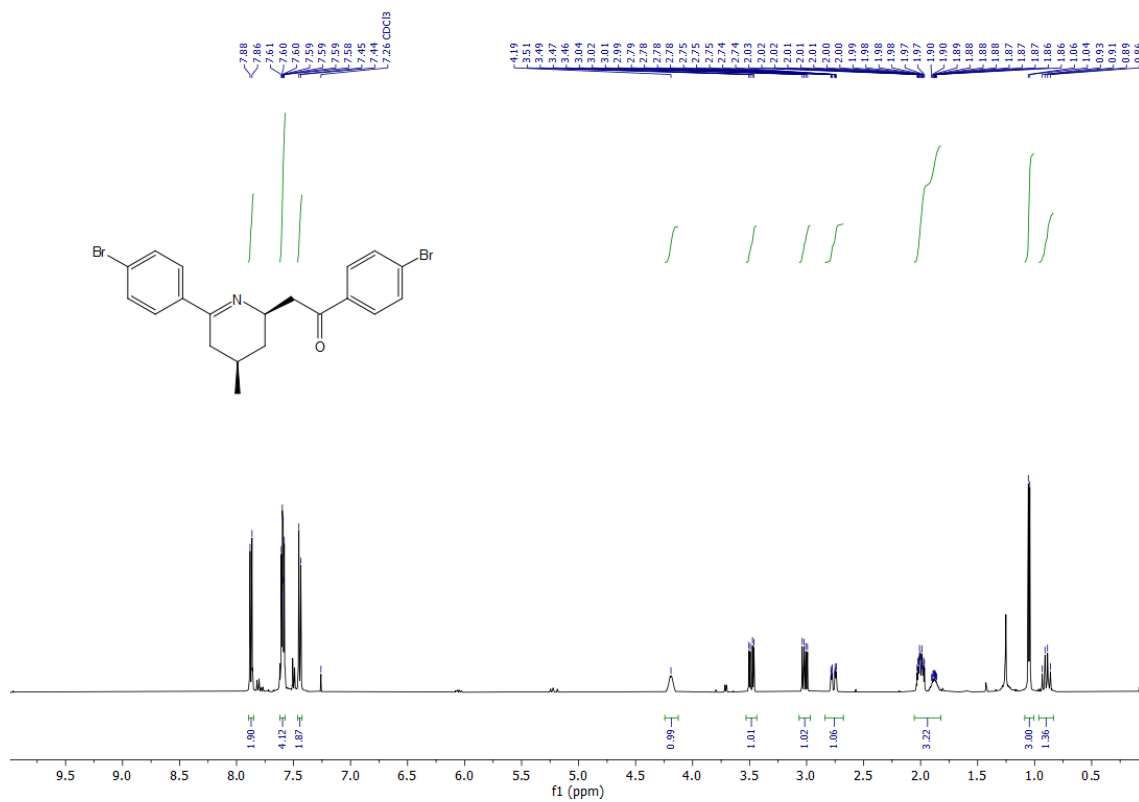

Figure 7.  $^1\text{H}$ -NMR full chart for **2d** in  $\text{CDCl}_3$ .



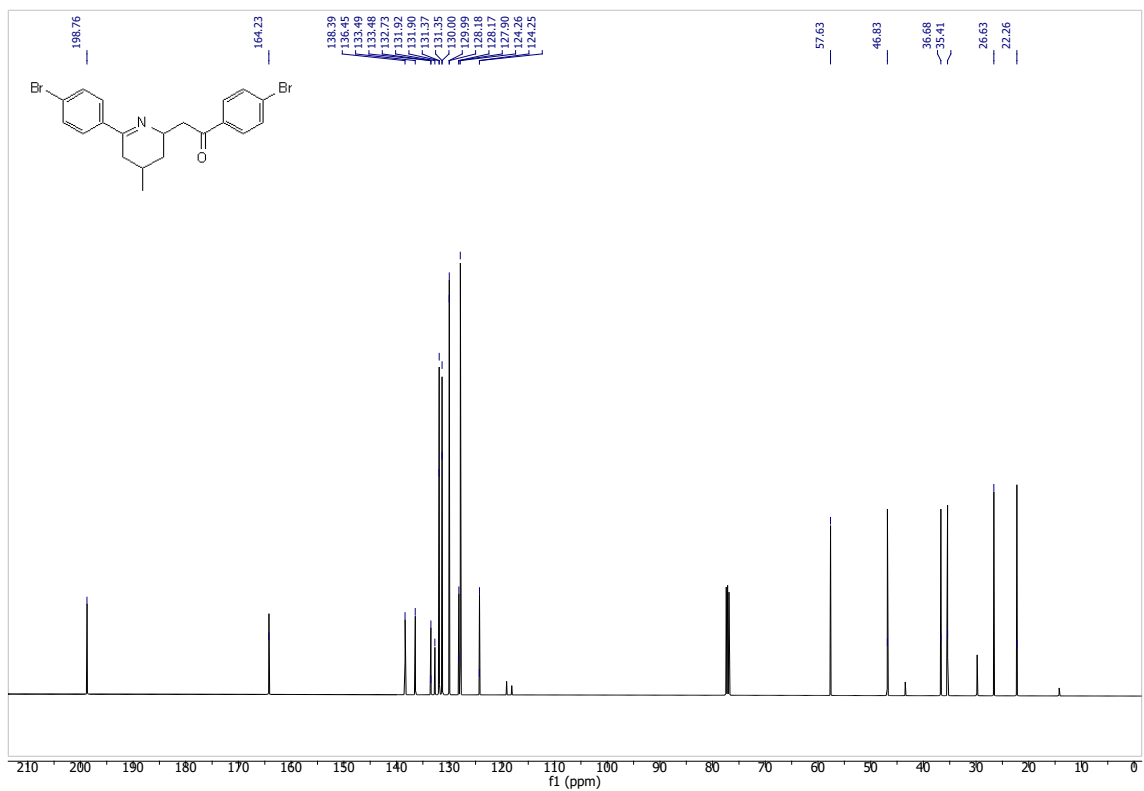

**Figure 8.**  $^{13}\text{C-NMR}$  full chart for **2d** in  $\text{CDCl}_3$ .

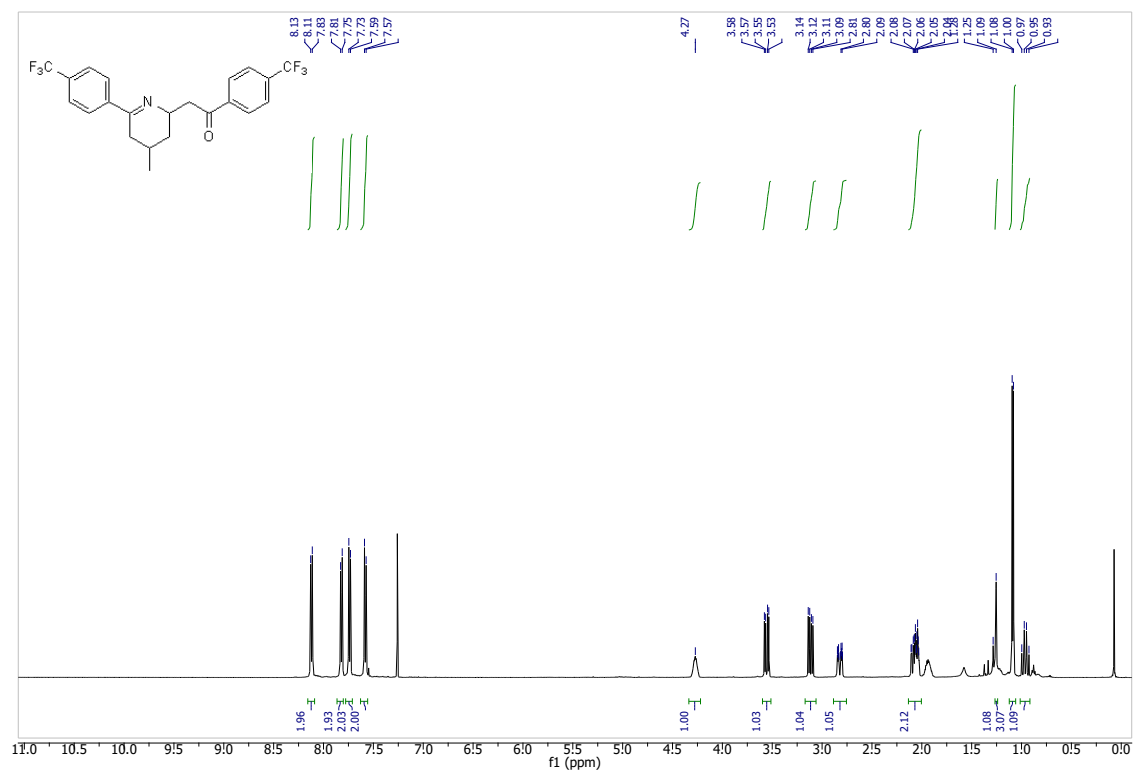

**Figure 9.**  $^1\text{H-NMR}$  full chart for **2e** in  $\text{CDCl}_3$ .

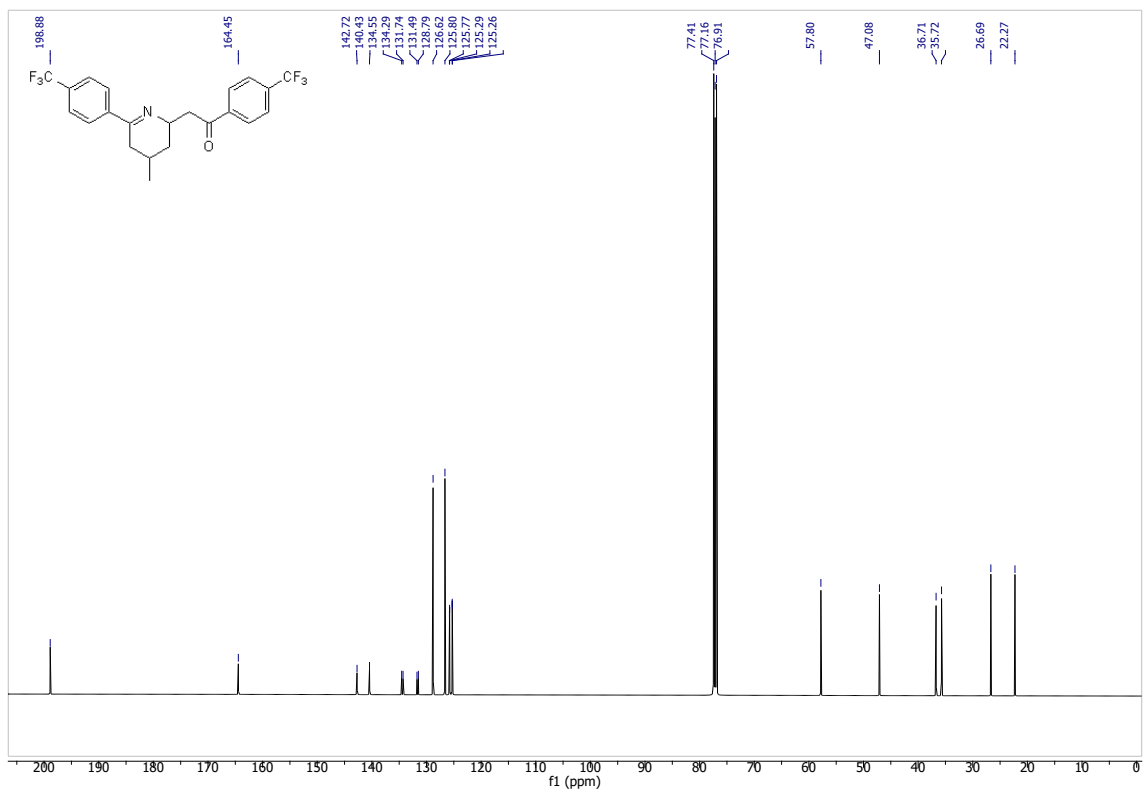

**Figure 10.** <sup>13</sup>C-NMR full chart for **2e** in CDCl<sub>3</sub>.

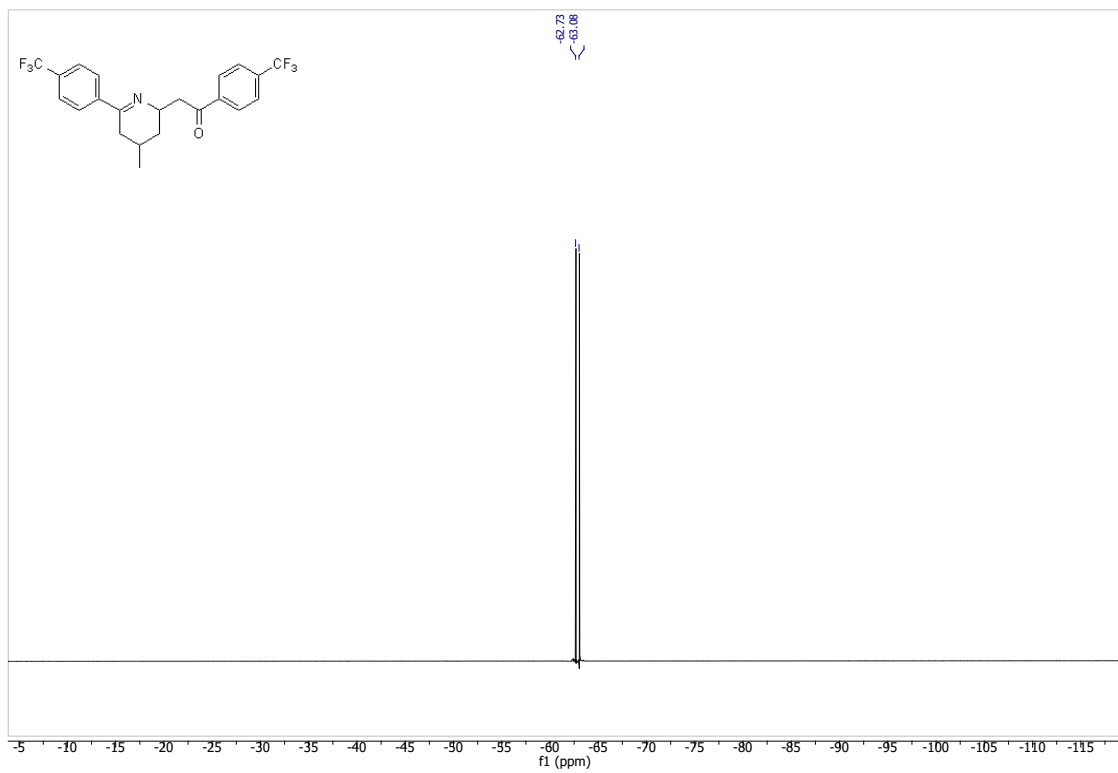

**Figure 11.** <sup>19</sup>F-NMR full chart for **2e** in CDCl<sub>3</sub>.

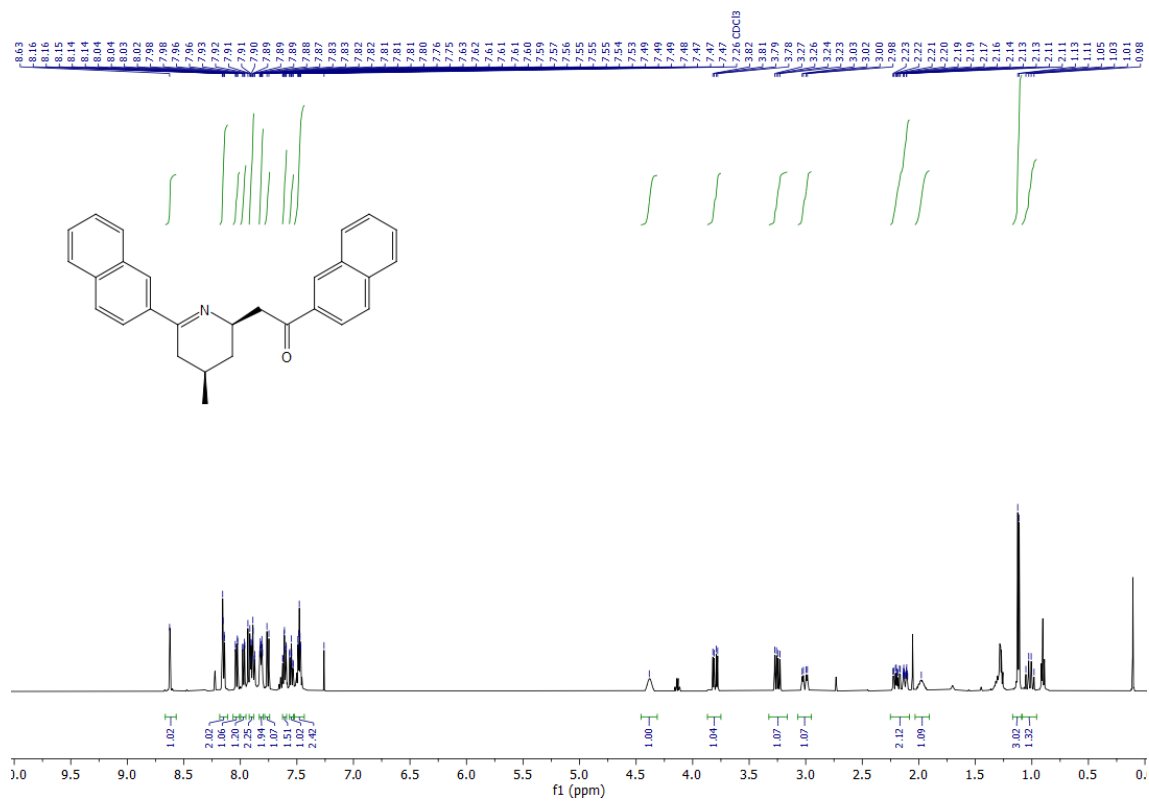

**Figure 12.** <sup>1</sup>H-NMR full chart for **2f** in CDCl<sub>3</sub>.

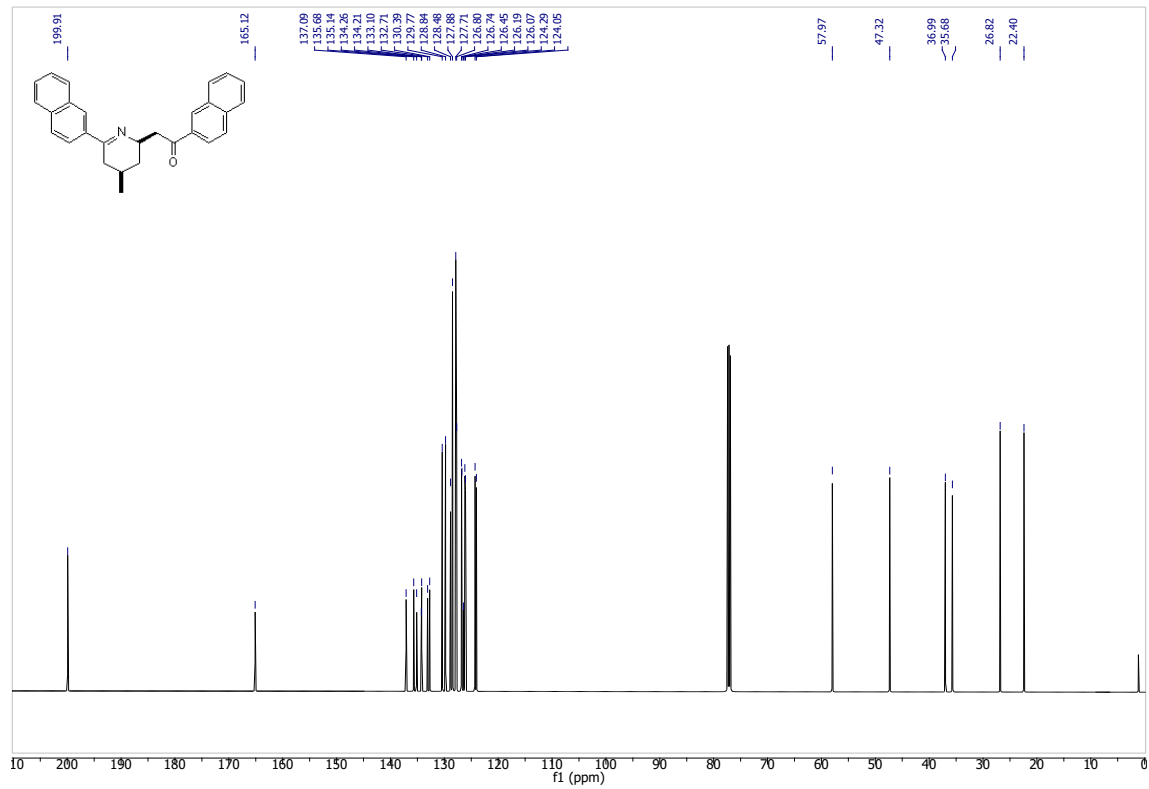

**Figure 13.** <sup>13</sup>C-NMR full chart for **2f** in CDCl<sub>3</sub>.

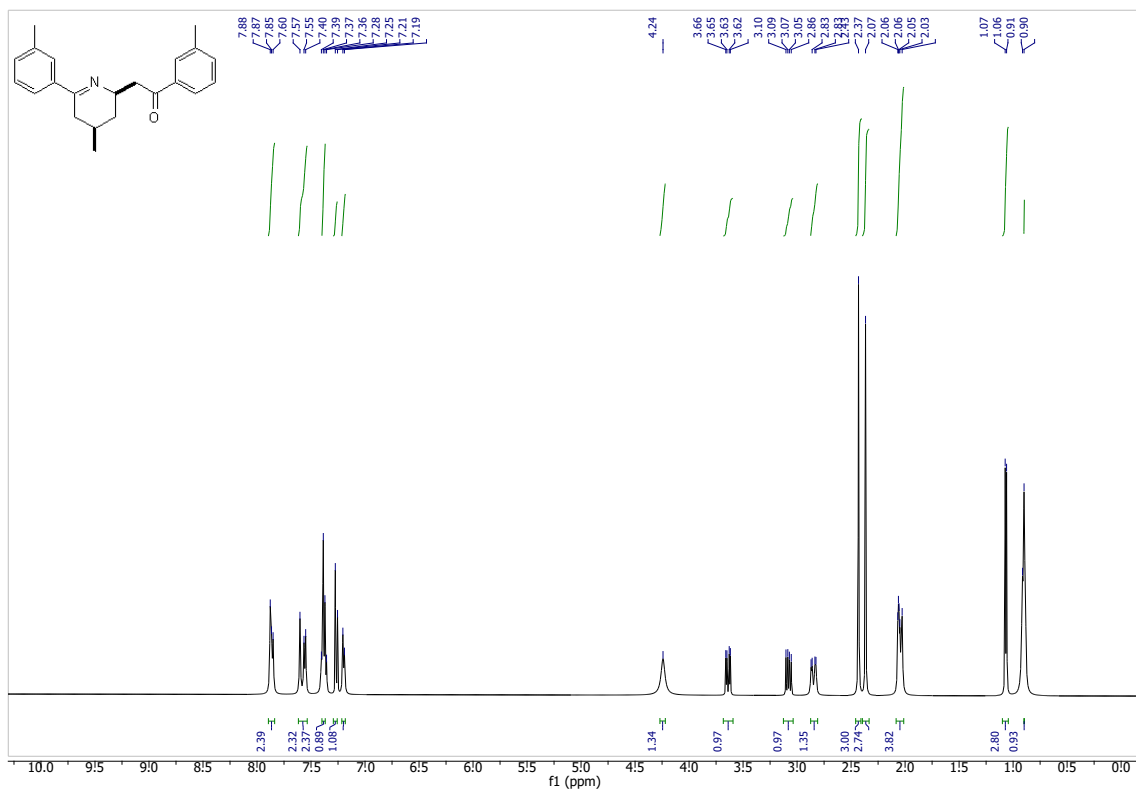

Figure 14. <sup>1</sup>H-NMR full chart for **2g** in CDCl<sub>3</sub>.

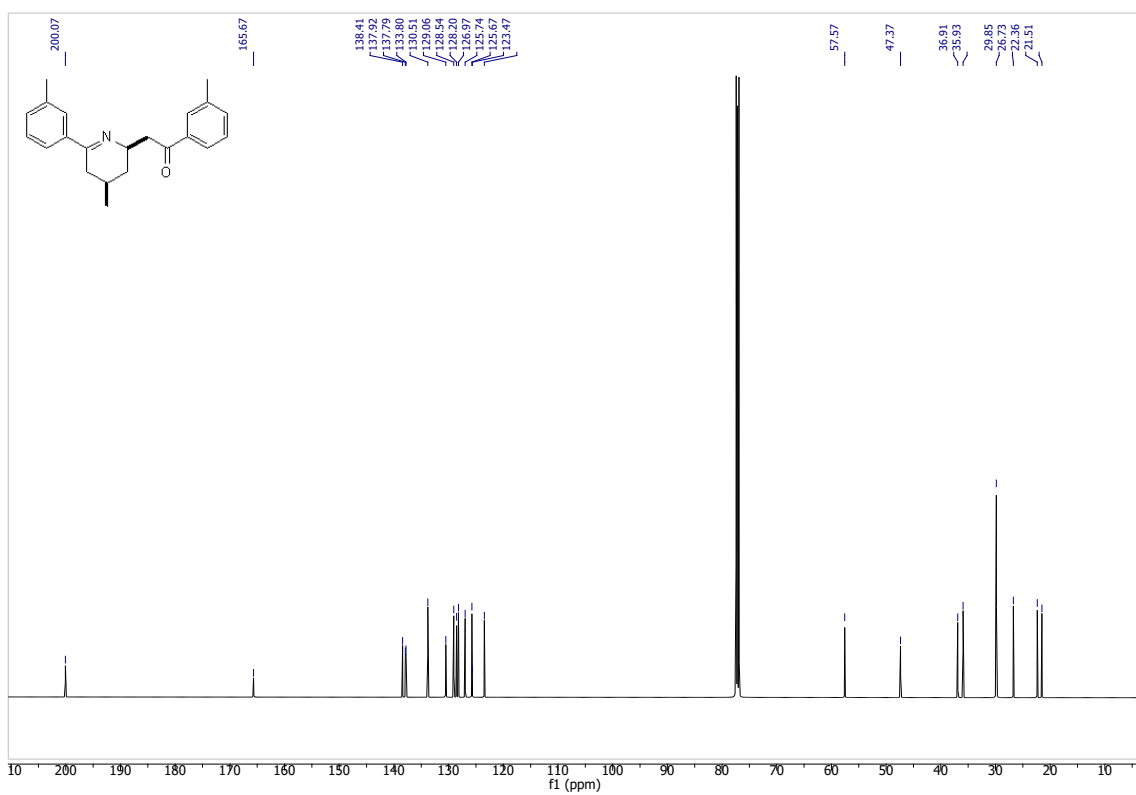

Figure 15. <sup>13</sup>C-NMR full chart for **2g** in CDCl<sub>3</sub>.

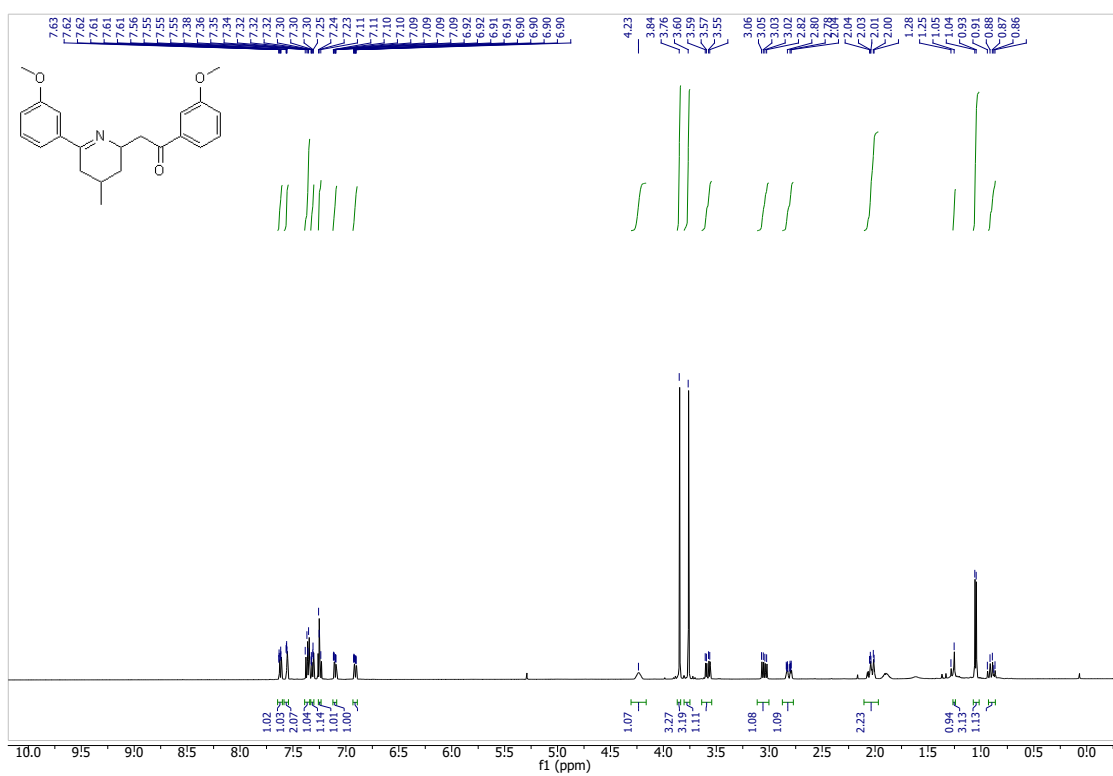

**Figure 16.** <sup>1</sup>H-NMR full chart for **2h** in CDCl<sub>3</sub>.

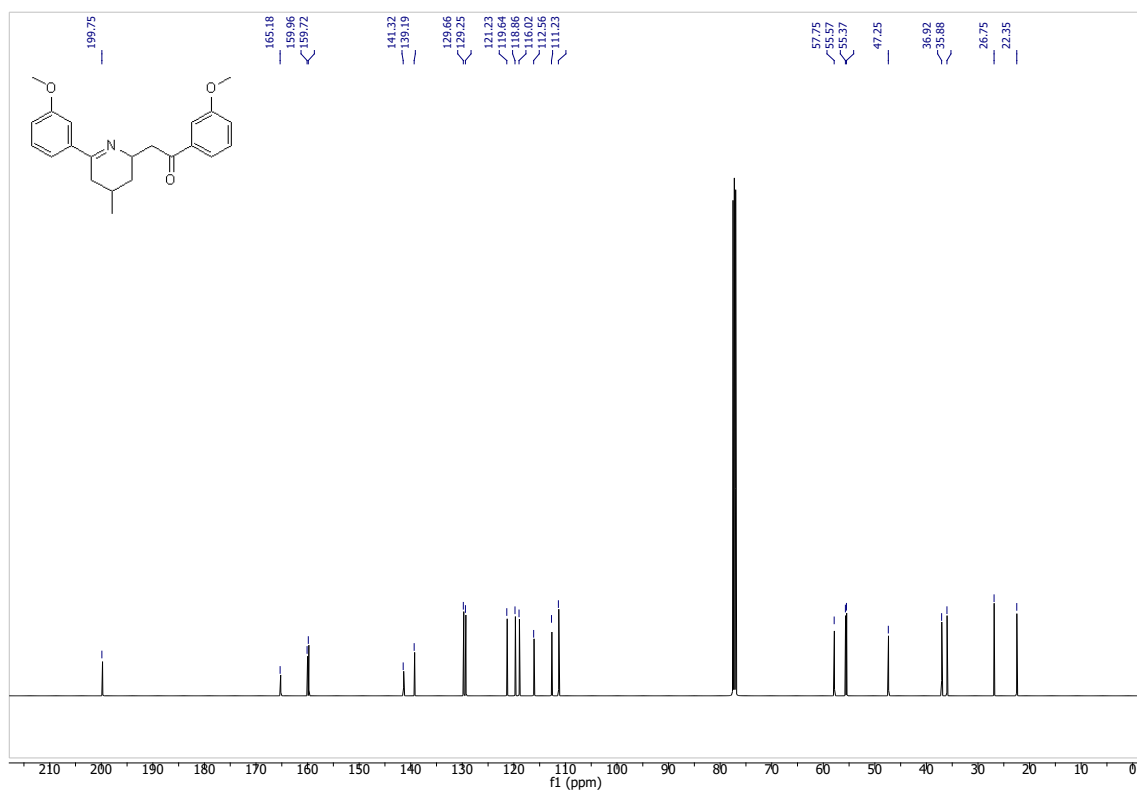

**Figure 17.** <sup>13</sup>C-NMR full chart for **2h** in CDCl<sub>3</sub>.

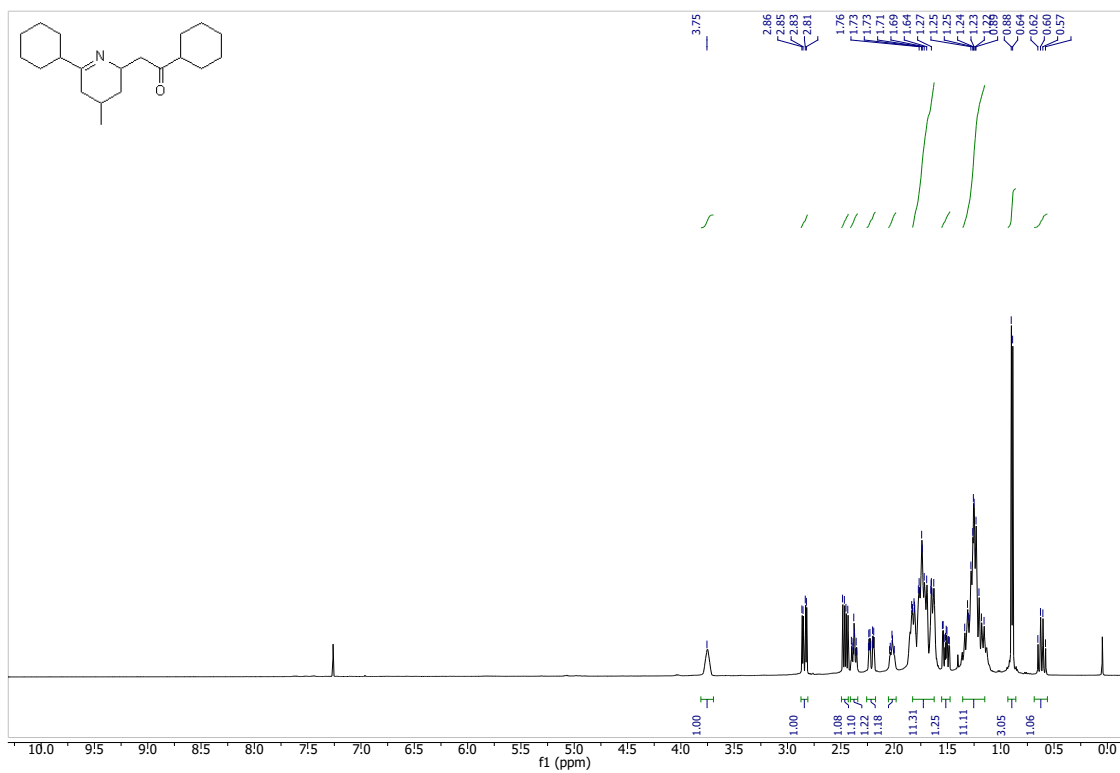

**Figure 18.** <sup>1</sup>H-NMR full chart for **2i** in CDCl<sub>3</sub>.

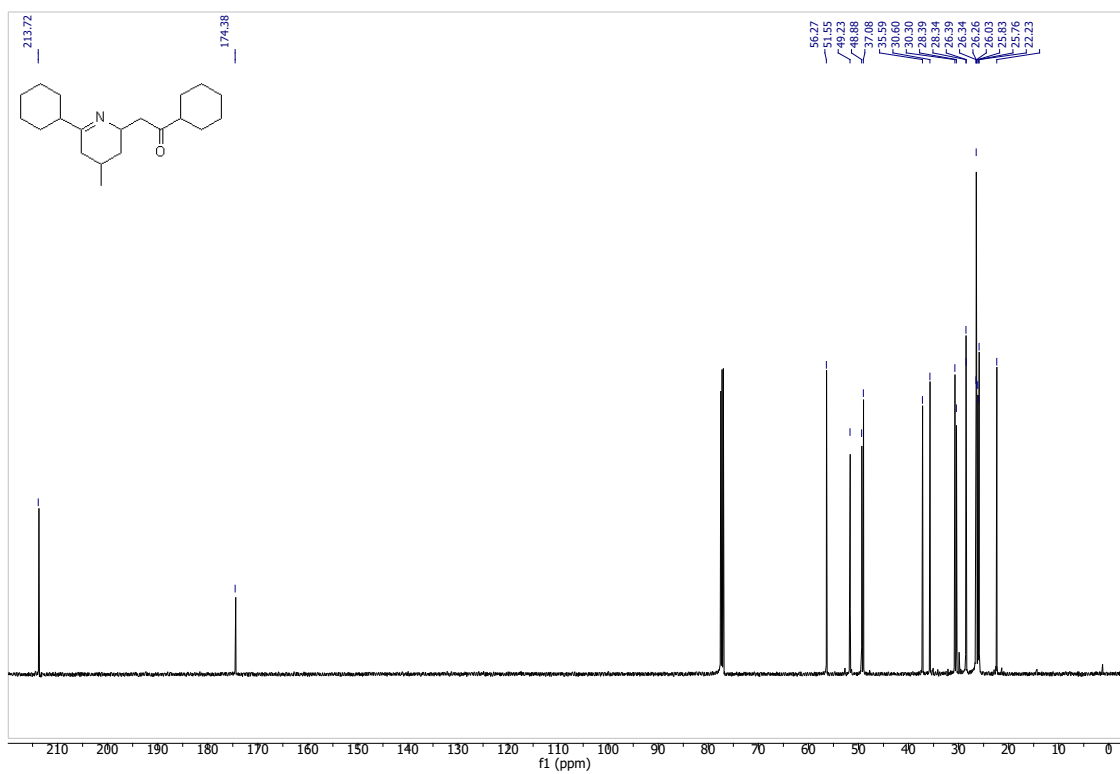

**Figure 19.** <sup>13</sup>C-NMR full chart for **2i** in CDCl<sub>3</sub>.

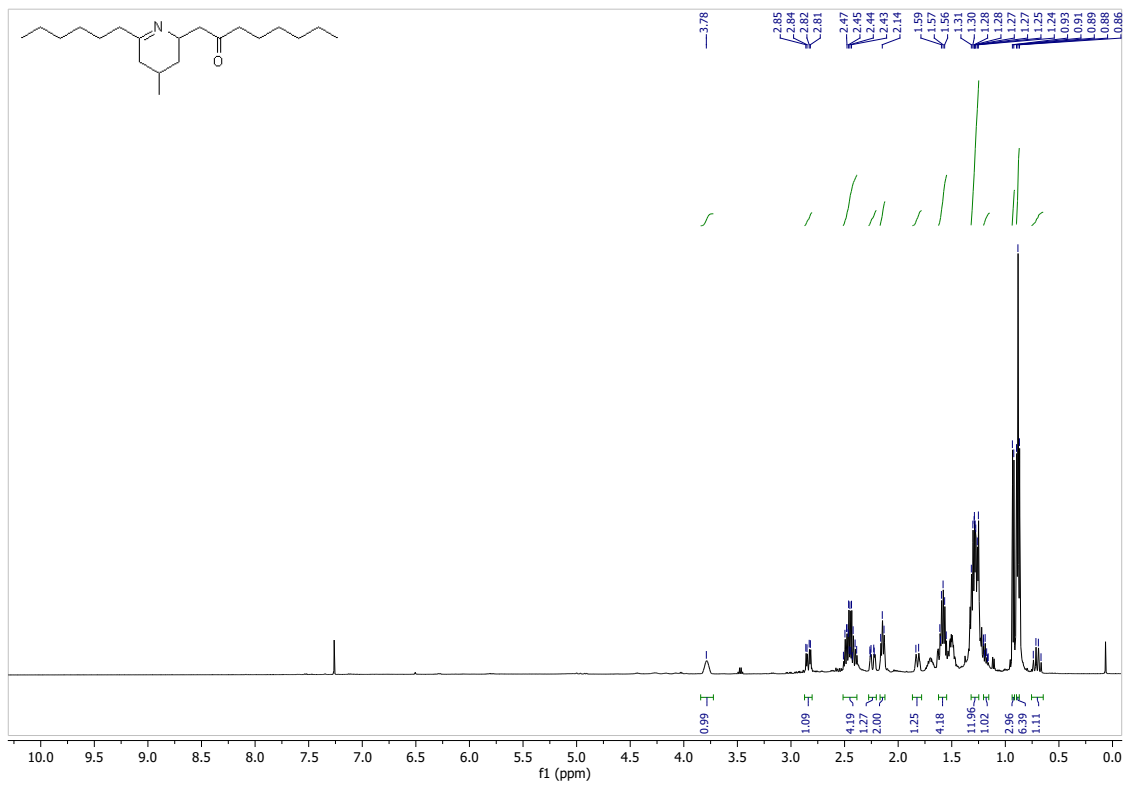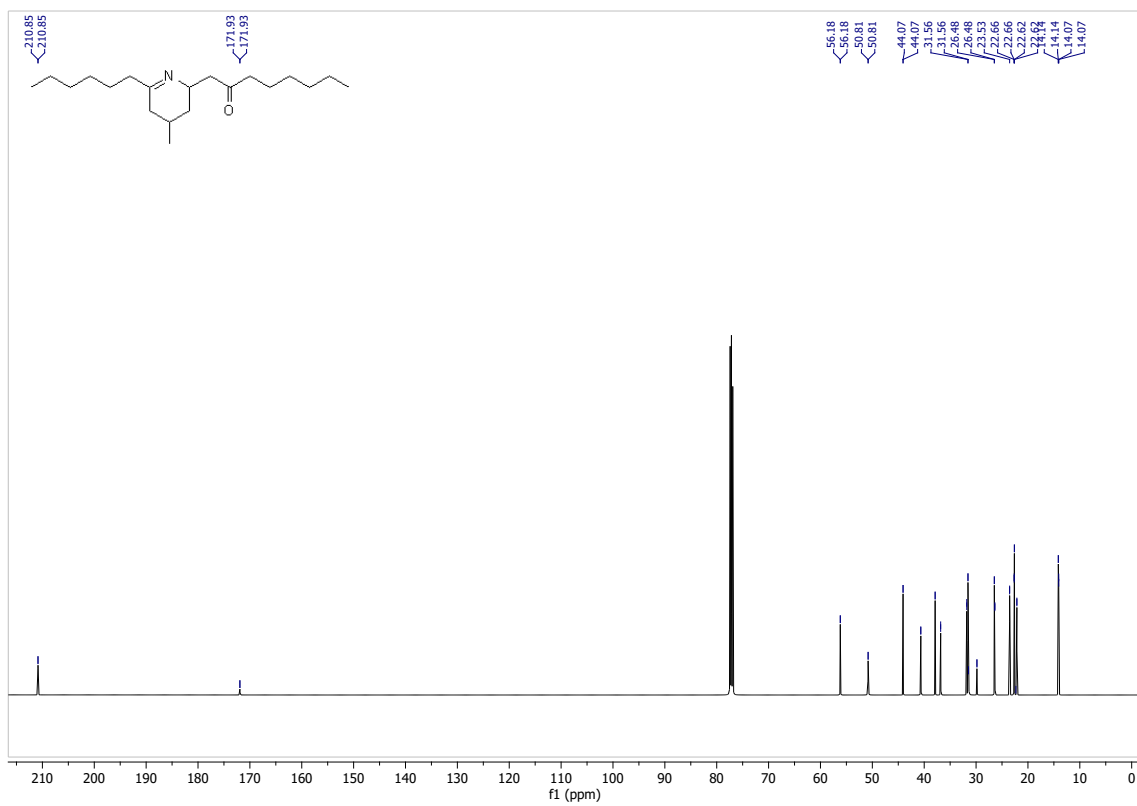

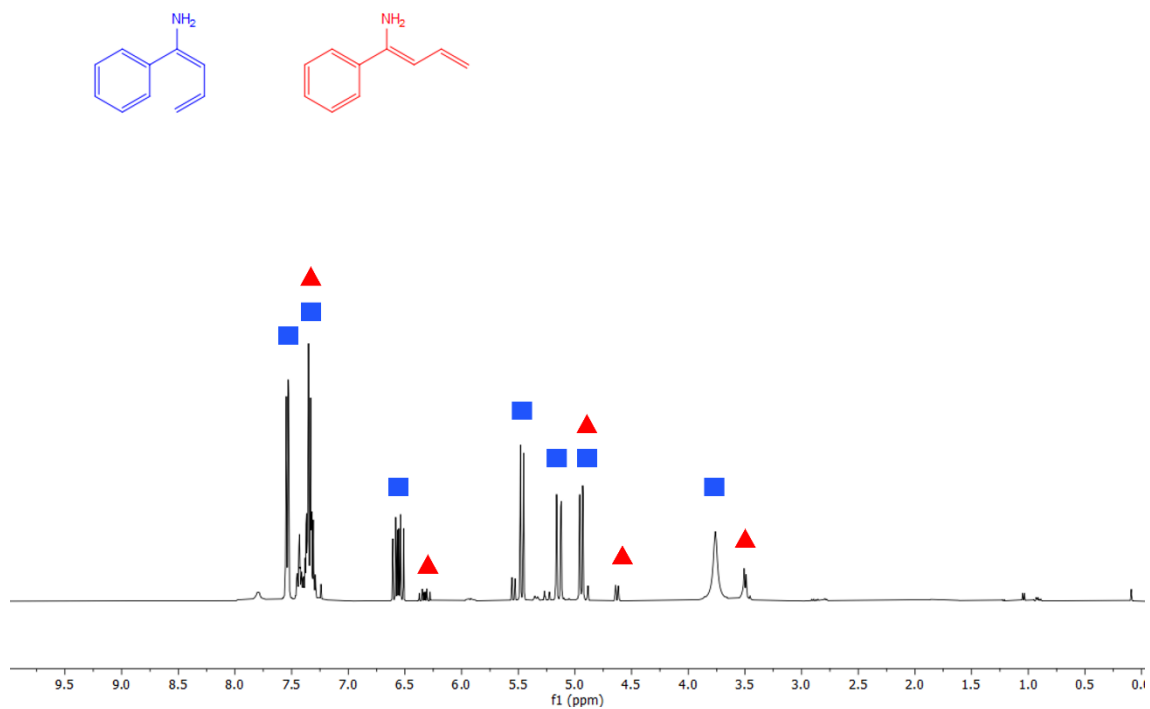

**Figure 22.** <sup>1</sup>H-NMR full chart for *E*-3a and *Z*-3a in CDCl<sub>3</sub>.

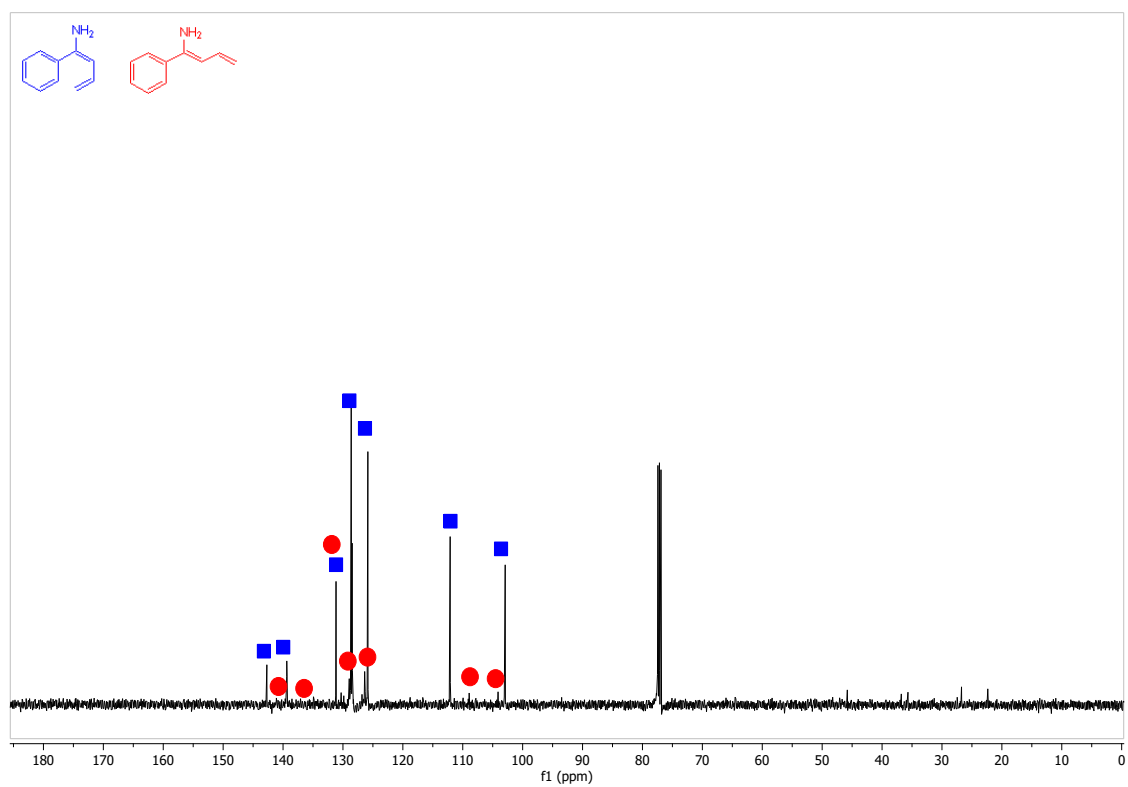

**Figure 23.** <sup>13</sup>C-NMR full chart for *E*-3a and *Z*-3a in CDCl<sub>3</sub>.



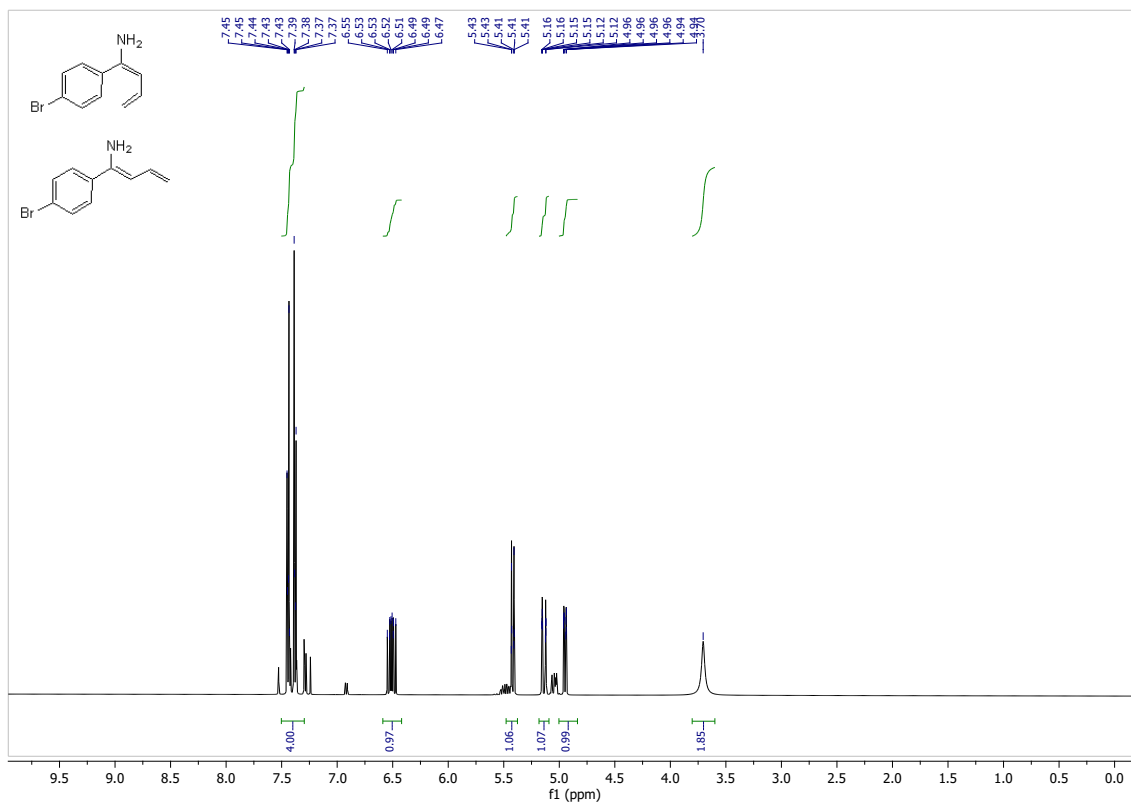

Figure 24.  $^1\text{H-NMR}$  full chart for *E-3d* and *Z-3d* in  $\text{CDCl}_3$ .

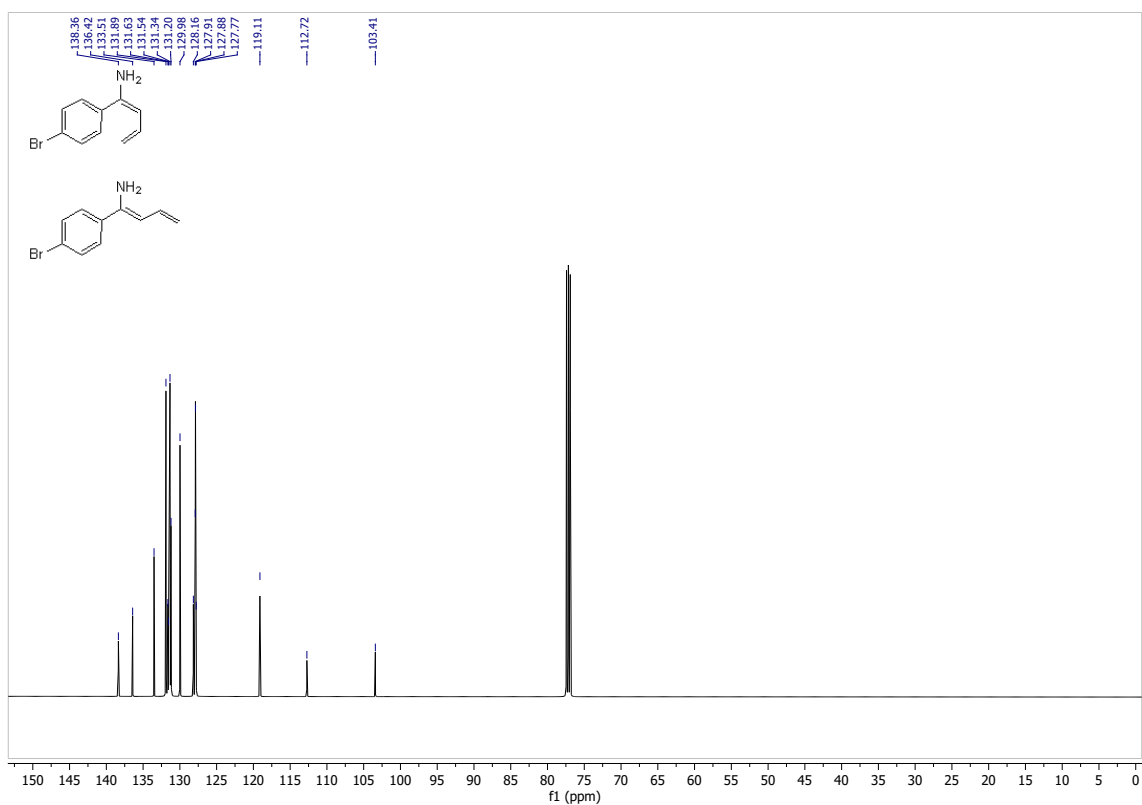

Figure 25.  $^{13}\text{C-NMR}$  full chart for *E-3d* and *Z-3d* in  $\text{CDCl}_3$ .

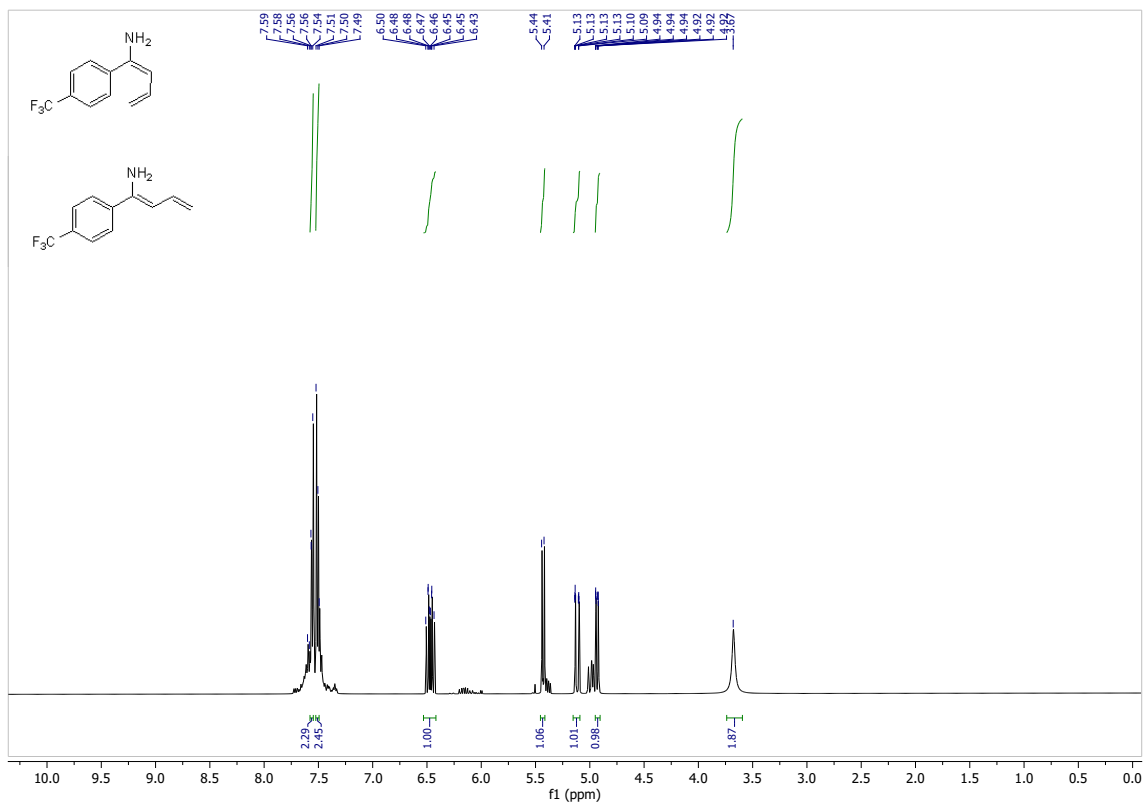

Figure 26. <sup>1</sup>H-NMR full chart *E*-3e and *Z*-3e in CDCl<sub>3</sub>.

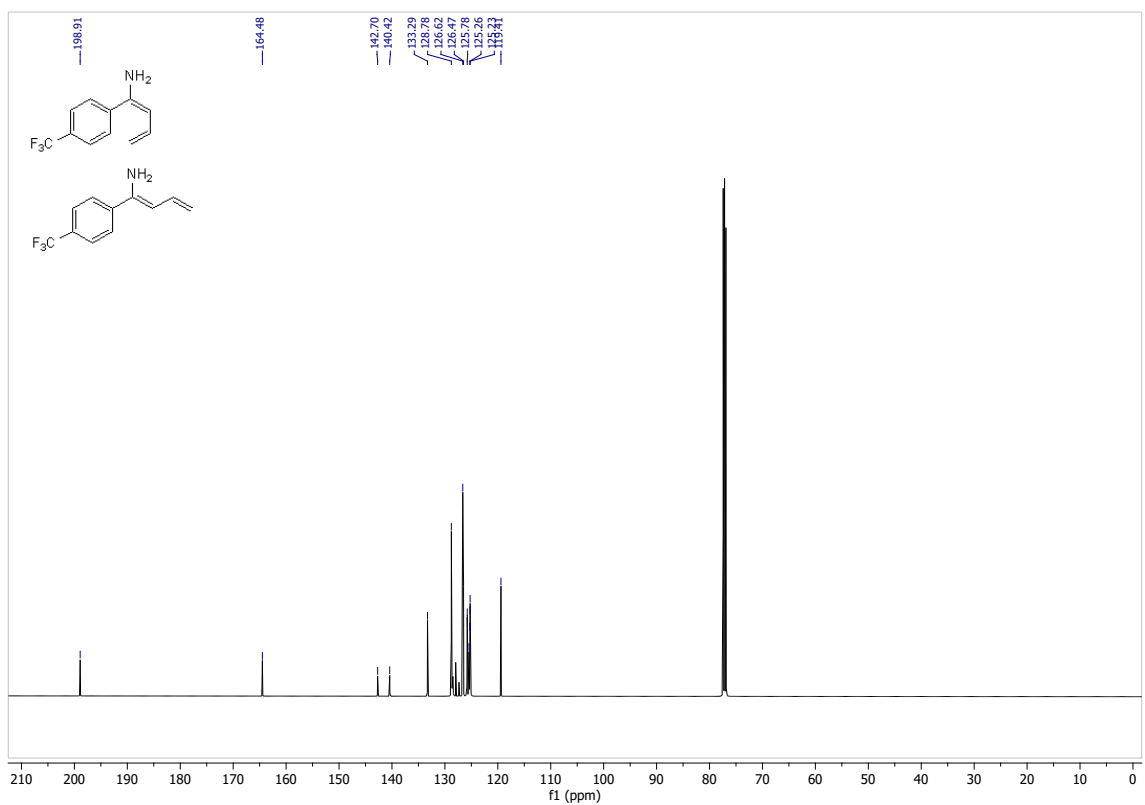

Figure 27. <sup>13</sup>C-NMR full chart for *E*-3e and *Z*-3e in CDCl<sub>3</sub>.

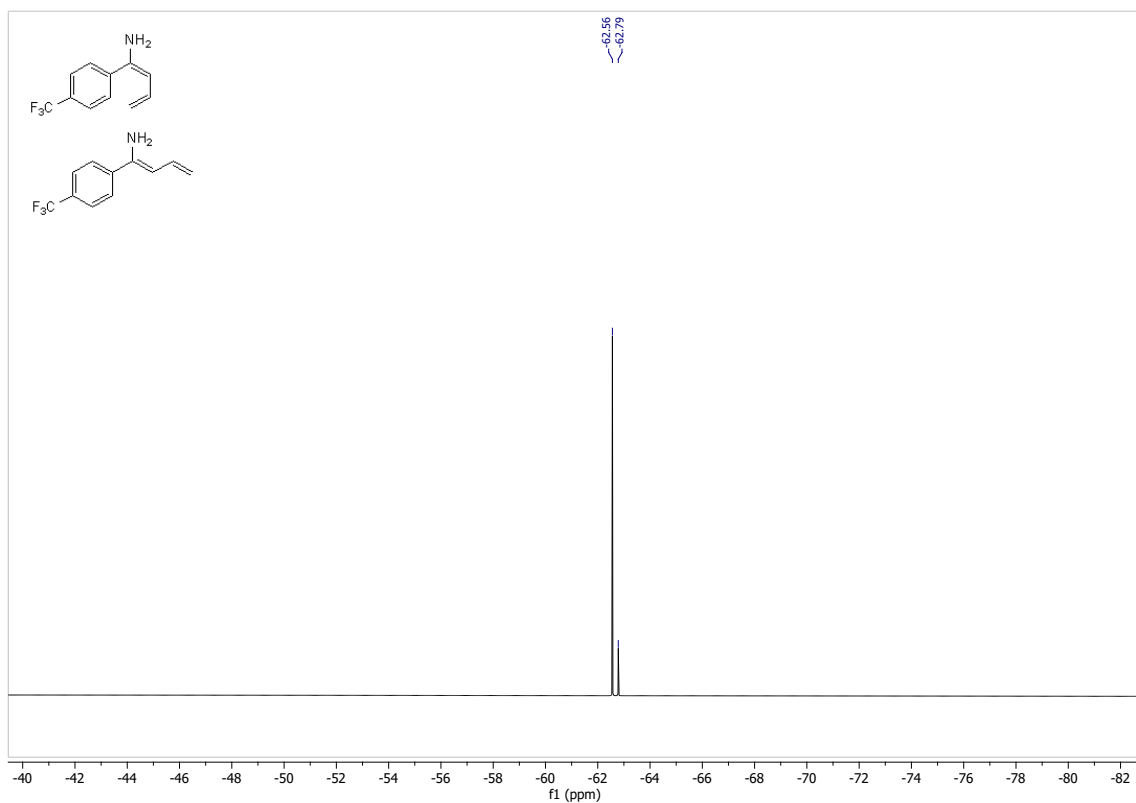

**Figure 28.**  $^{19}\text{F}$ -NMR full chart for *E*-3e and *Z*-3e in  $\text{CDCl}_3$ .

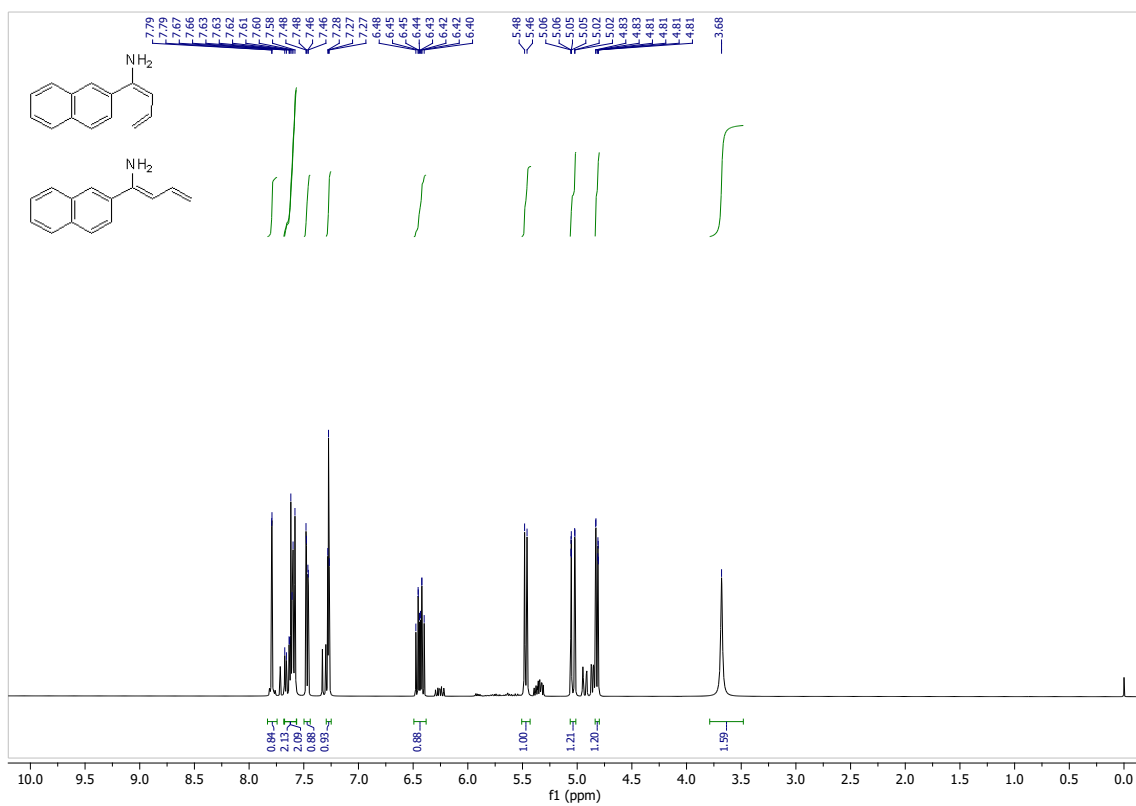

**Figure 29.**  $^1\text{H}$ -NMR full chart for *E*-3f in  $\text{CDCl}_3$ .

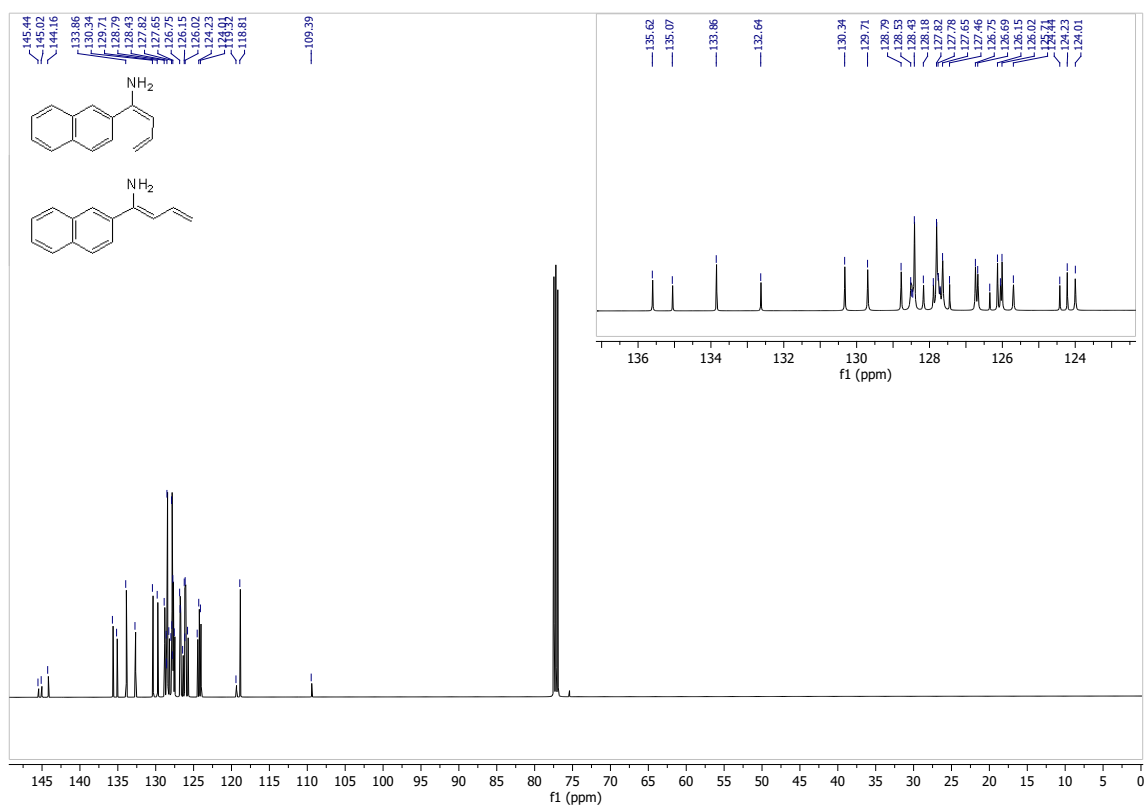

Figure 30. <sup>13</sup>C-NMR full chart for *E*-3f and *Z*-3f in CDCl<sub>3</sub>.

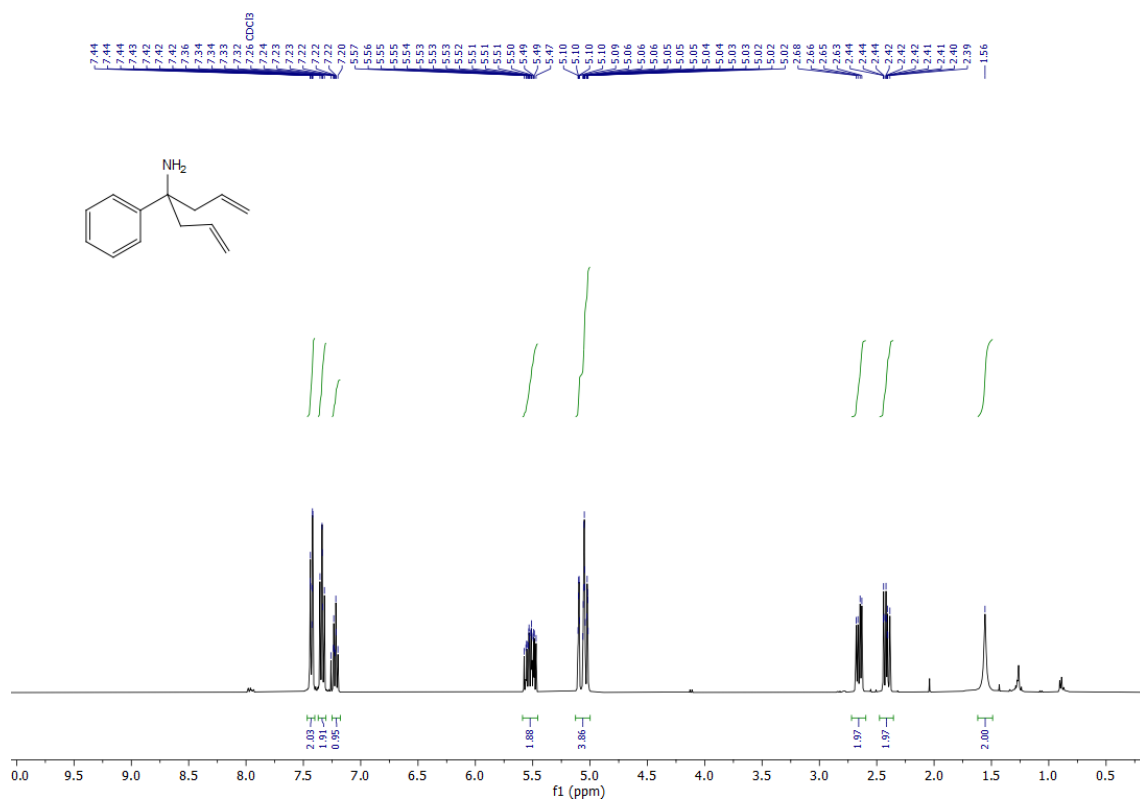

Figure 31. <sup>1</sup>H-NMR full chart for 4a in CDCl<sub>3</sub>.

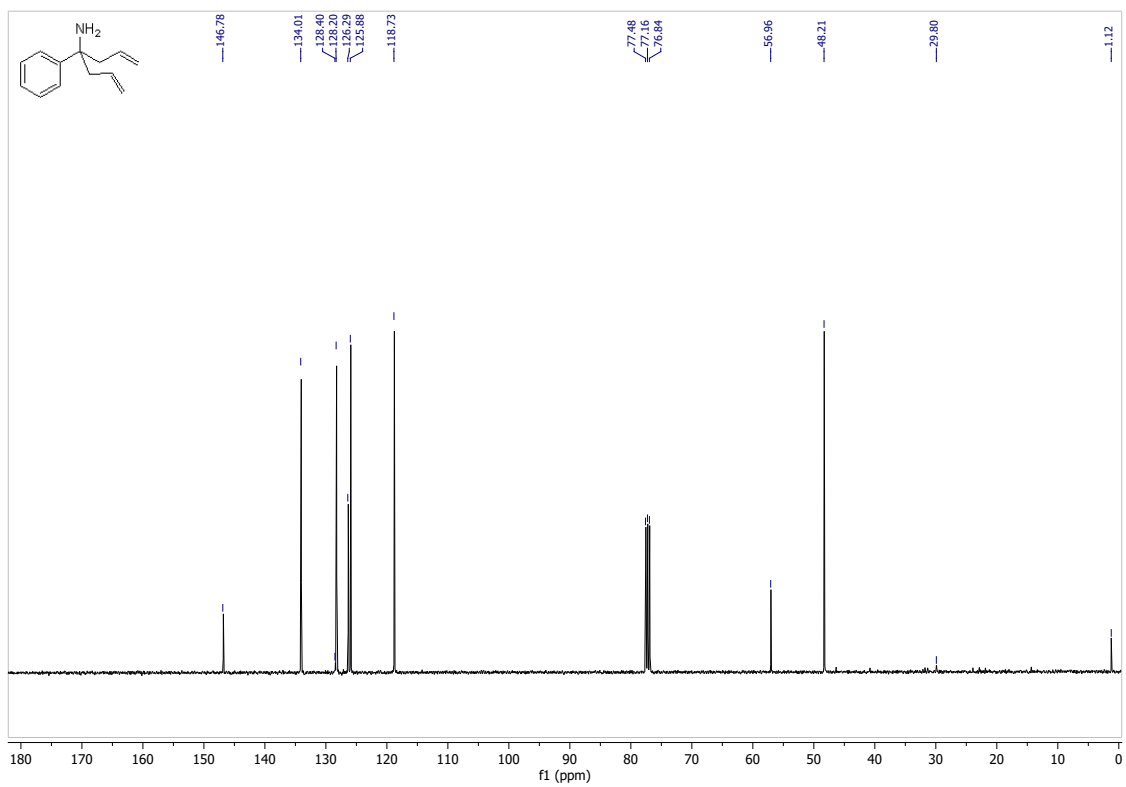

**Figure 32.** <sup>13</sup>C-NMR full chart for **4a** in CDCl<sub>3</sub>.

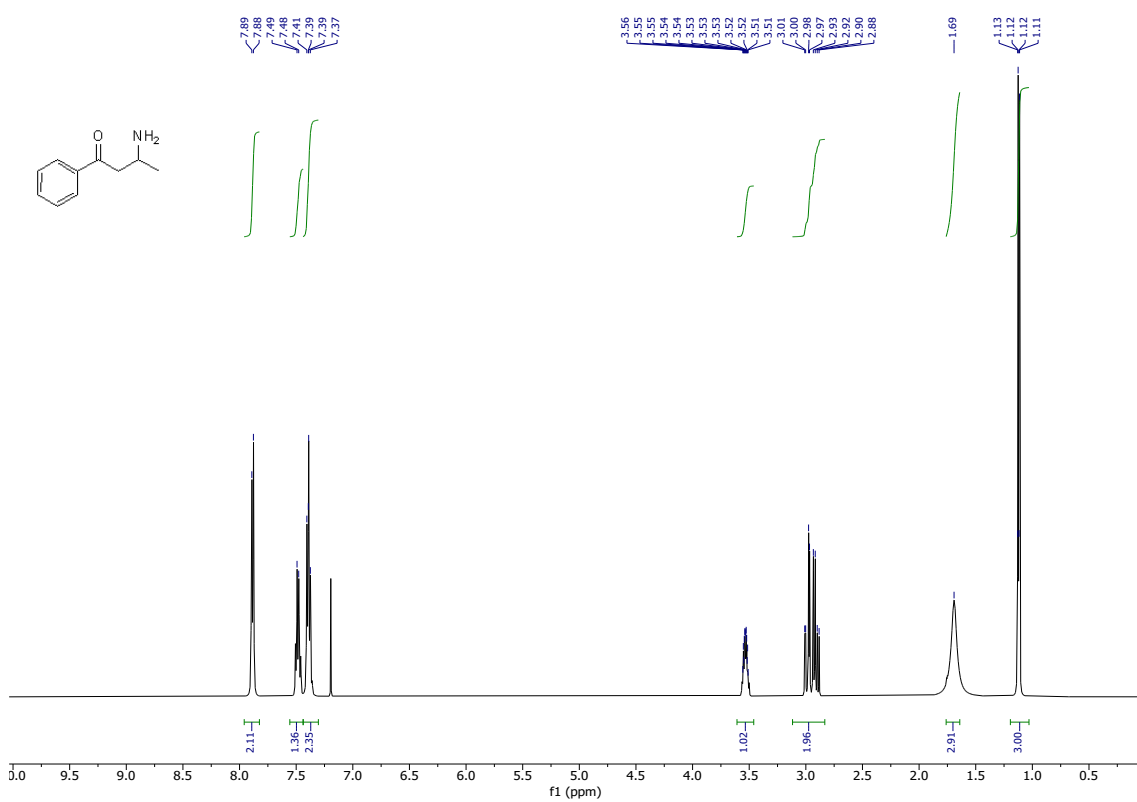

**Figure 33.** <sup>1</sup>H-NMR full chart for **5a** in CDCl<sub>3</sub>.

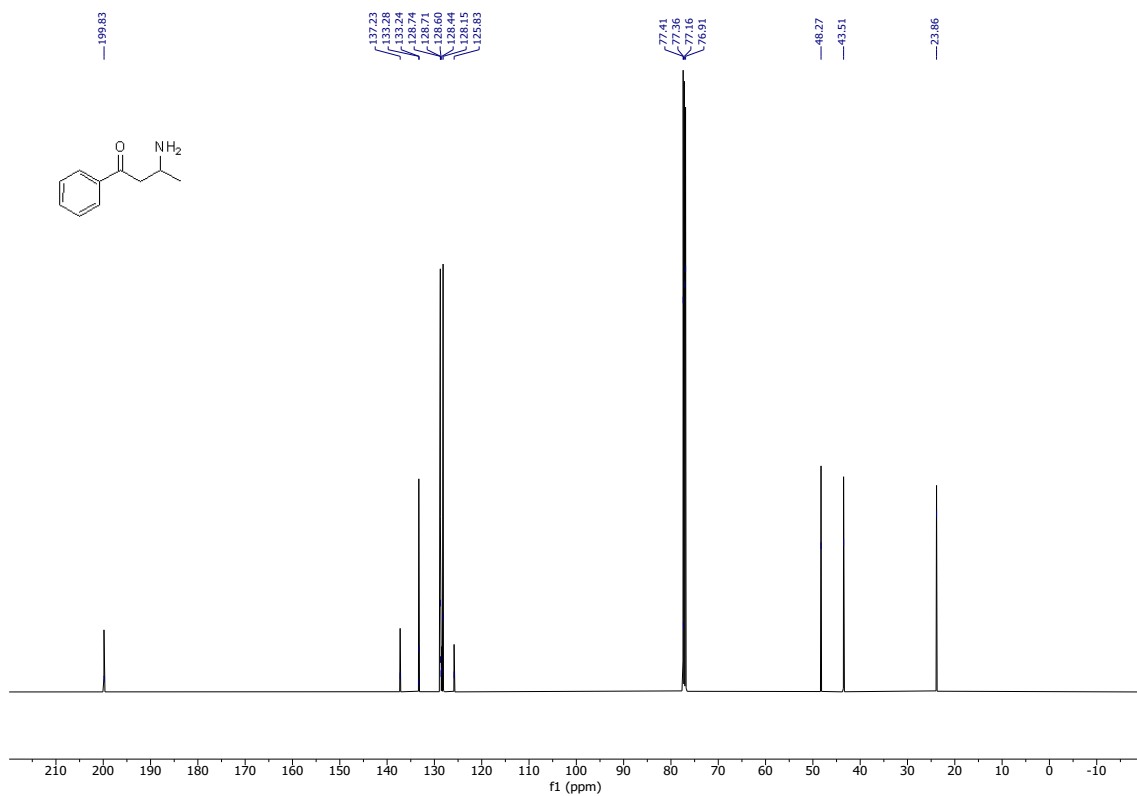

**Figure 34.** <sup>13</sup>C-NMR full chart for **5a** in CDCl<sub>3</sub>.

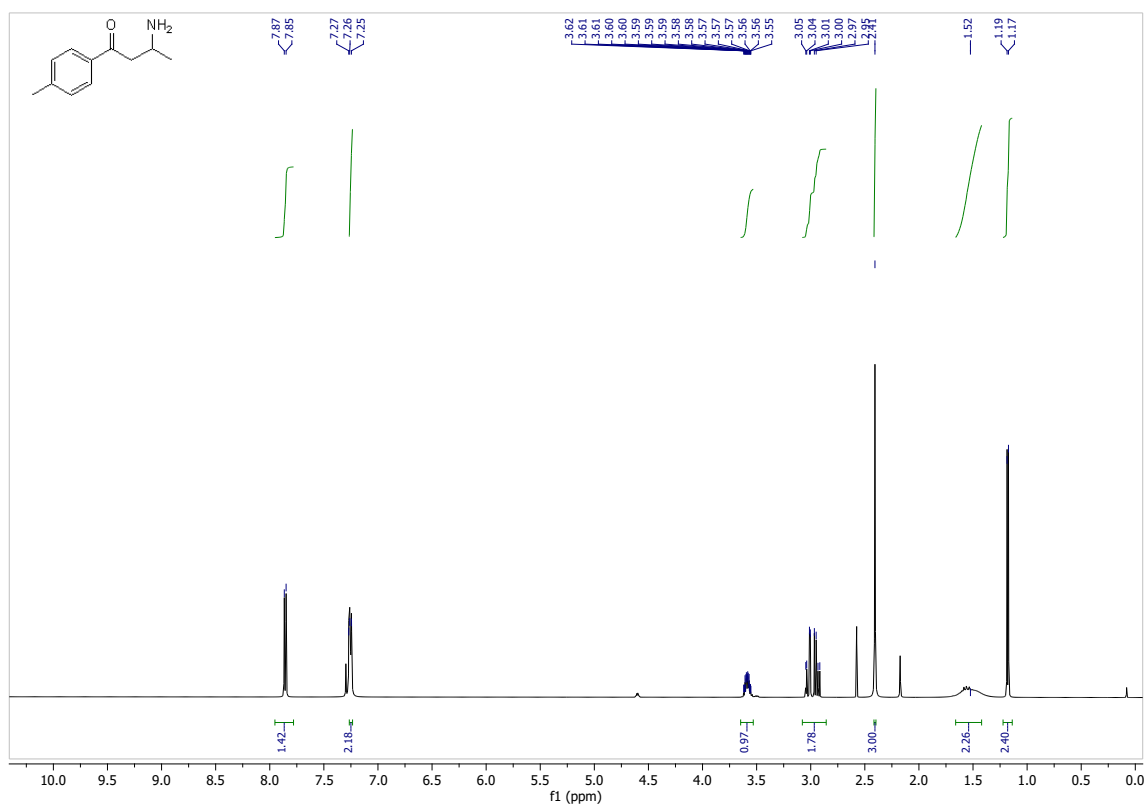

**Figure 35.** <sup>1</sup>H-NMR full chart for **5b** in CDCl<sub>3</sub>.

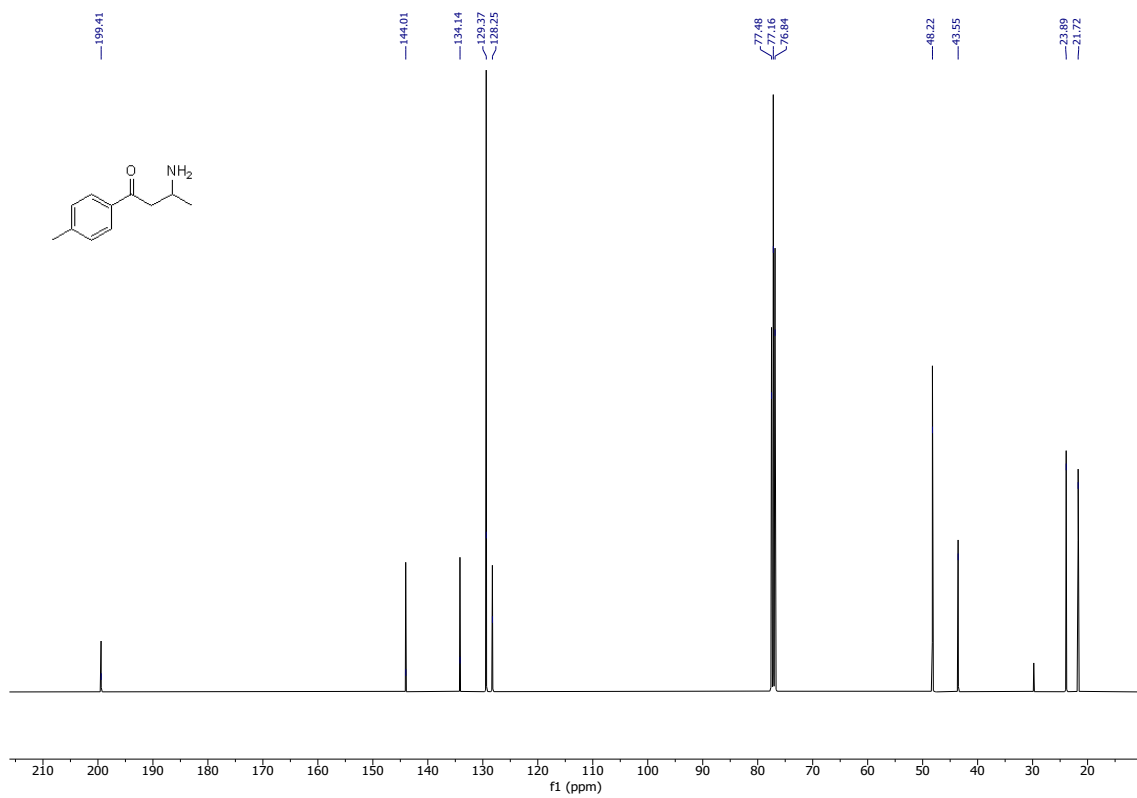

**Figure 36.**  $^{13}\text{C-NMR}$  full chart for **5b** in  $\text{CDCl}_3$ .

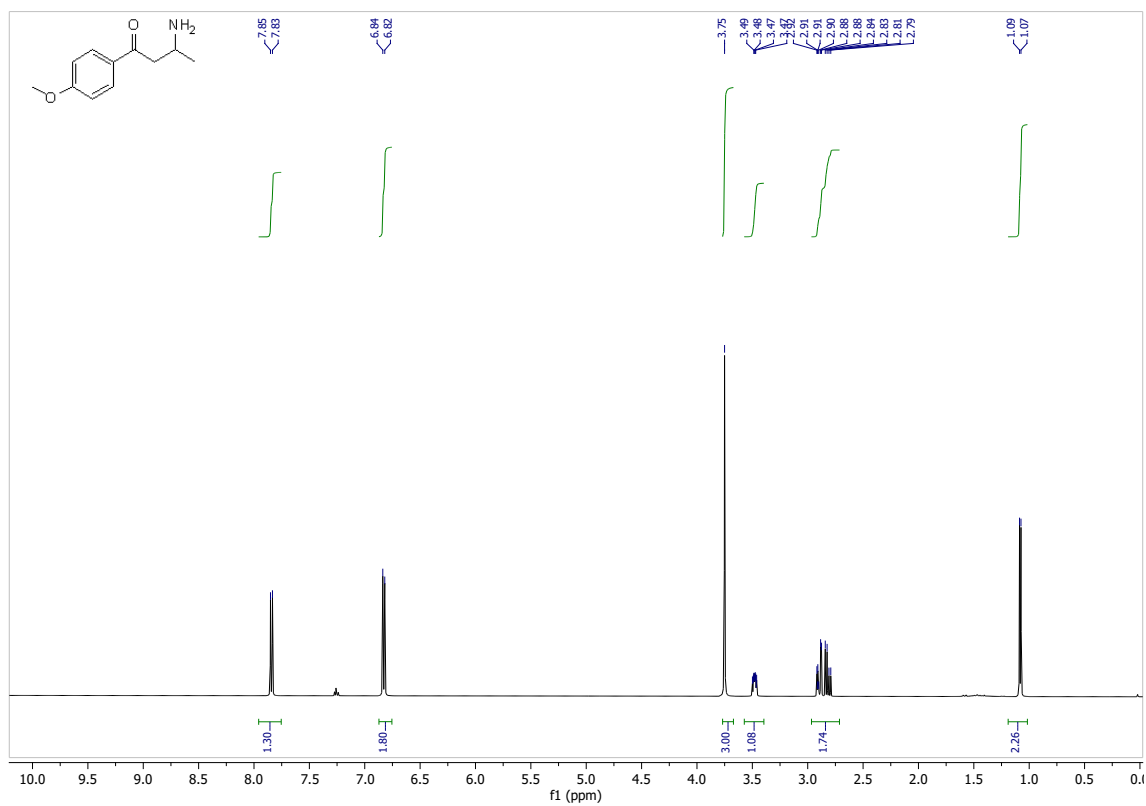

**Figure 37.**  $^1\text{H-NMR}$  full chart for **5c** in  $\text{CDCl}_3$ .

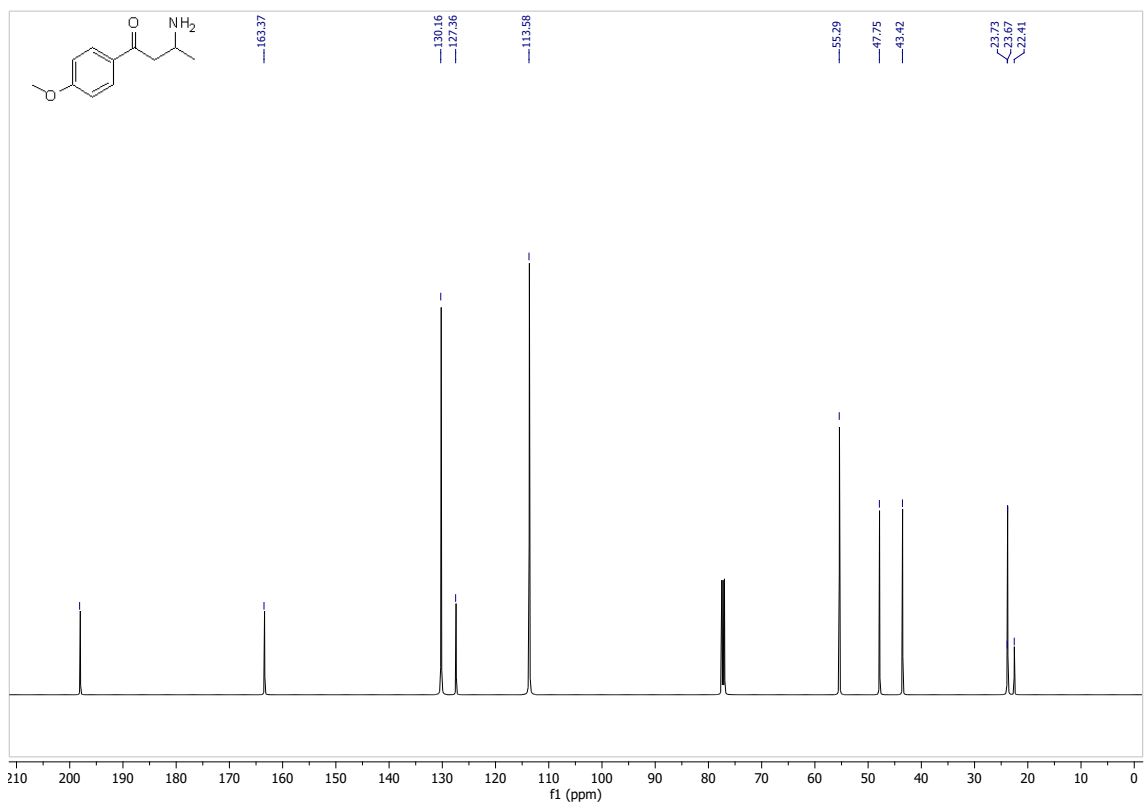

**Figure 38.**  $^{13}\text{C-NMR}$  full chart for **5c** in  $\text{CDCl}_3$ .

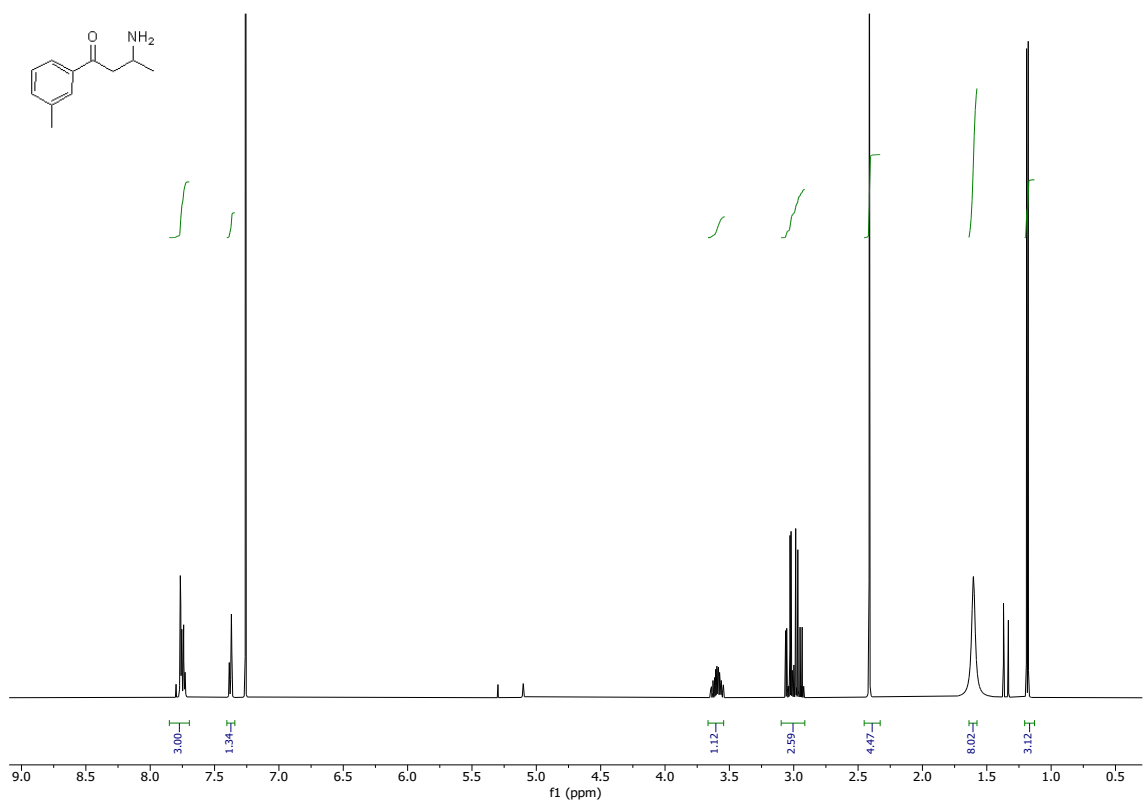

**Figure 39.**  $^1\text{H-NMR}$  full chart for **5g** in  $\text{CDCl}_3$ .



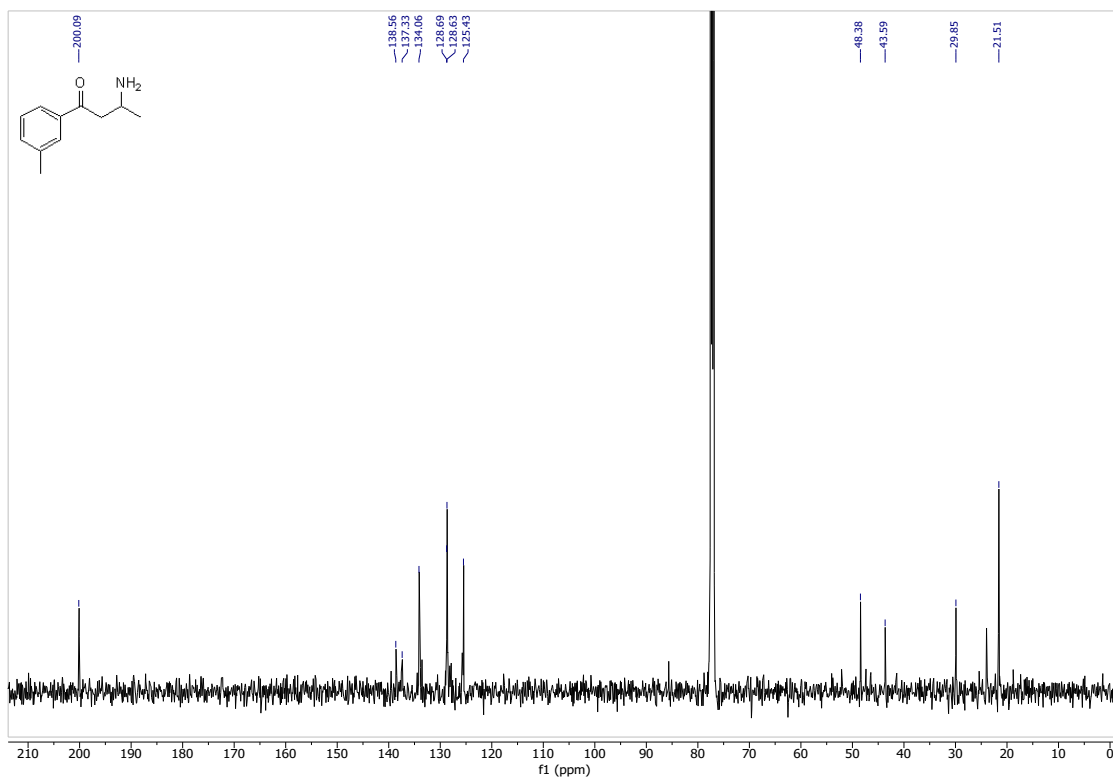

Figure 40. <sup>13</sup>C-NMR full chart for **5g** in CDCl<sub>3</sub>.

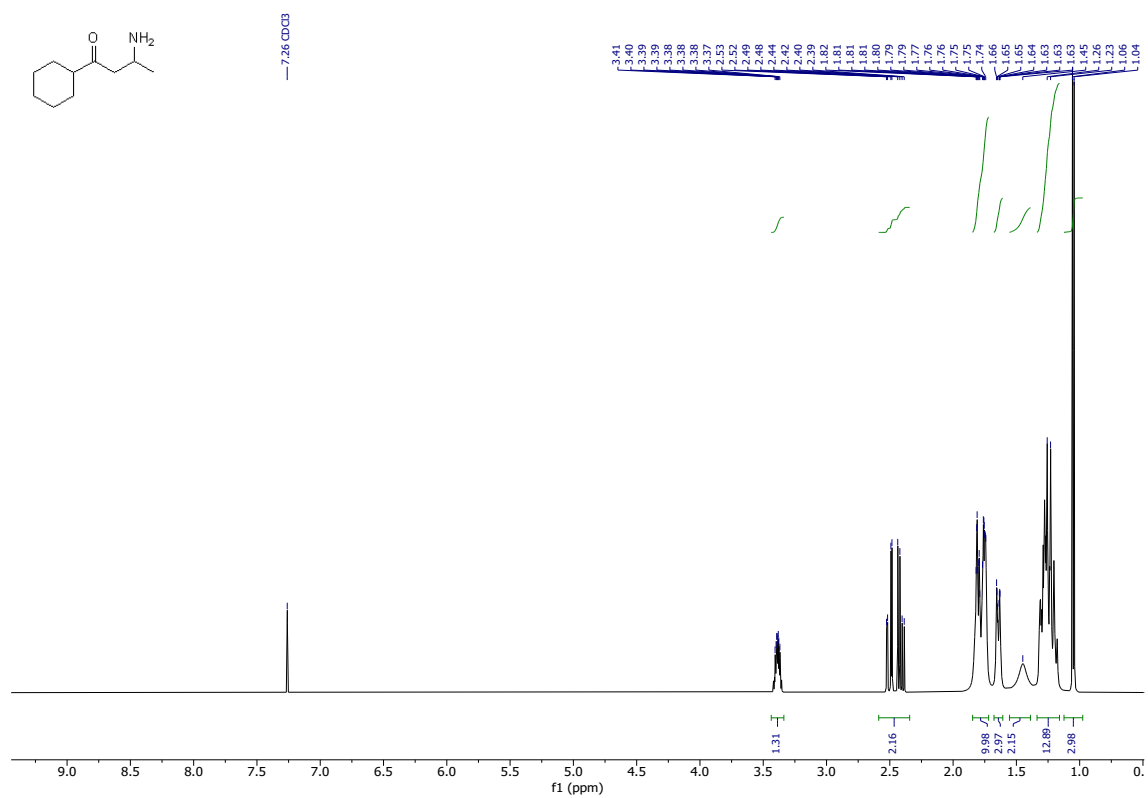

Figure 41. <sup>1</sup>H-NMR full chart for **5i** in CDCl<sub>3</sub>.

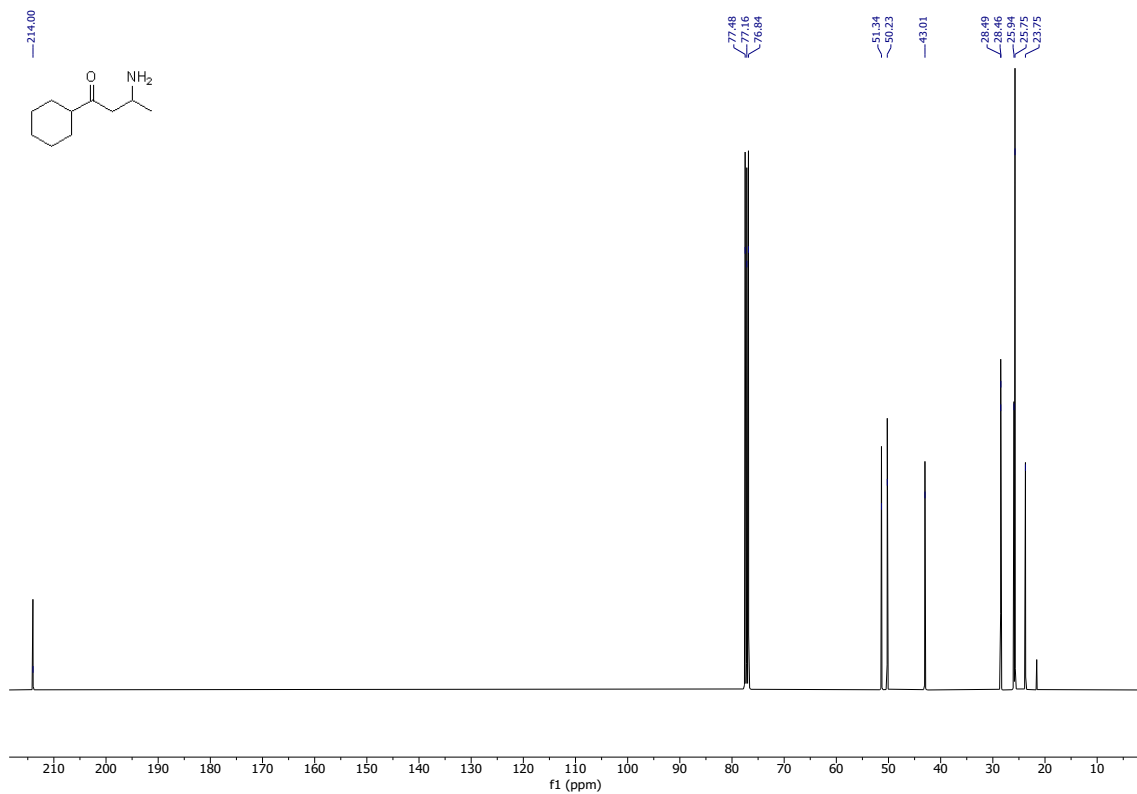

**Figure 42.**  $^{13}\text{C-NMR}$  full chart for **5i** in  $\text{CDCl}_3$ .

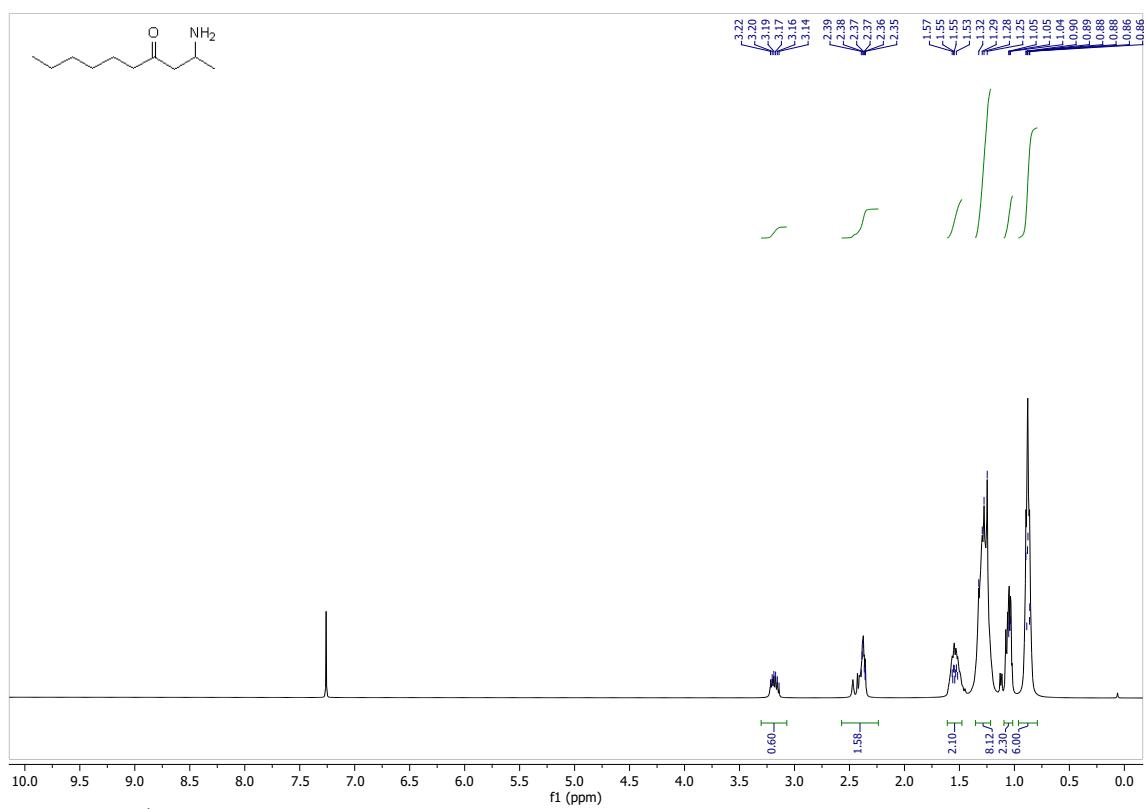

**Figure 43.**  $^1\text{H-NMR}$  full chart for **5j** in  $\text{CDCl}_3$ .

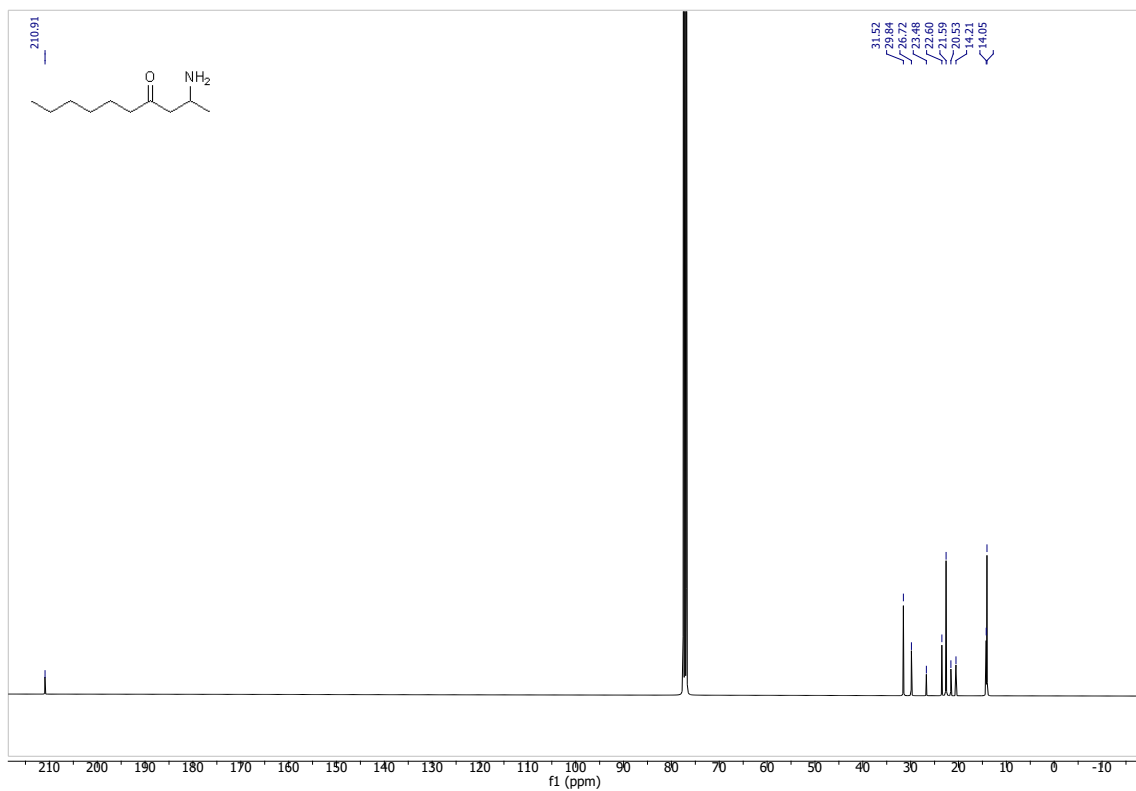

Figure 44. <sup>13</sup>C-NMR full chart for **5j** in CDCl<sub>3</sub>.

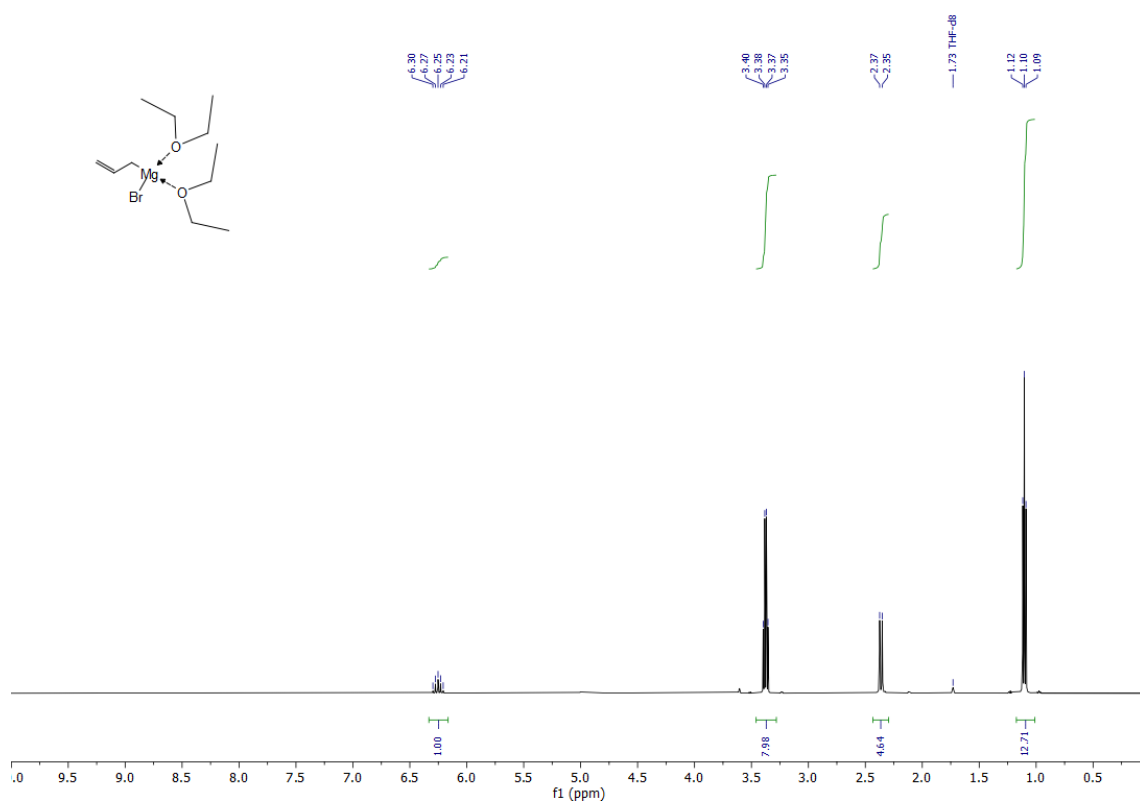

Figure 45. <sup>1</sup>H-NMR full chart for allylmagnesium bromide in THF-d<sub>8</sub>.

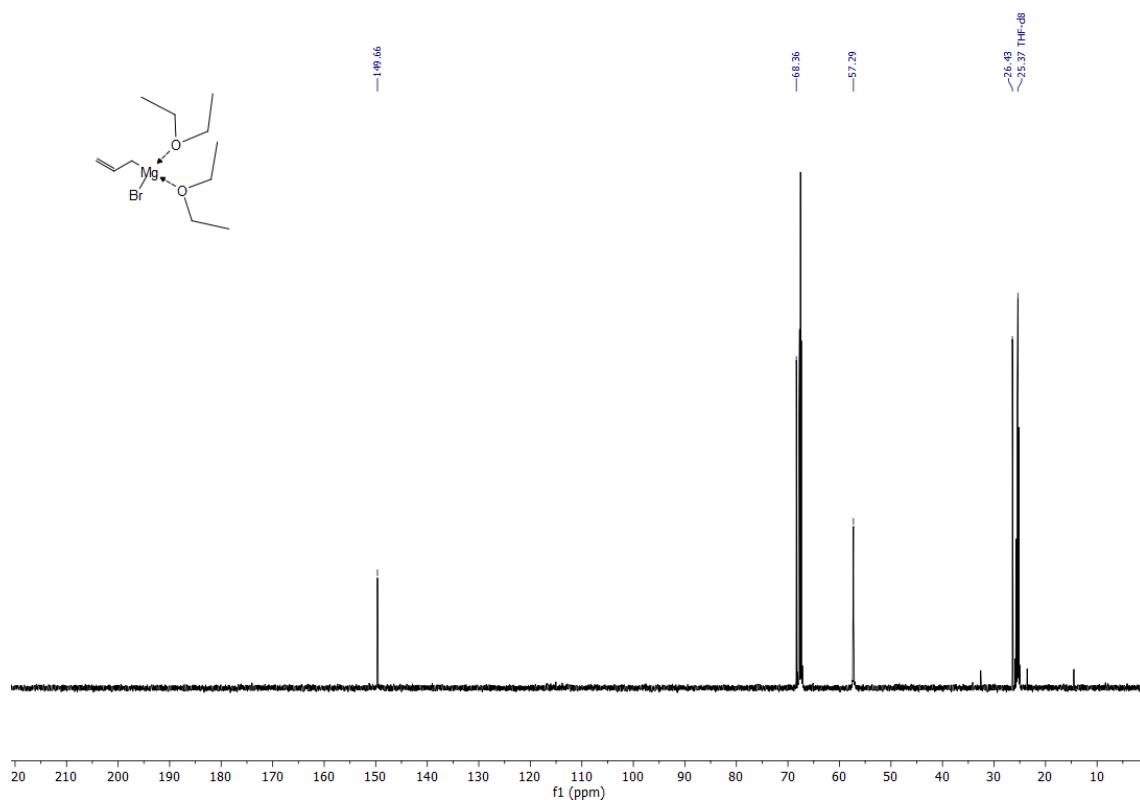

**Figure 46.**  $^{13}\text{C}$ -NMR full chart for allylmagnesium bromide in  $\text{THF-d}_8$ .

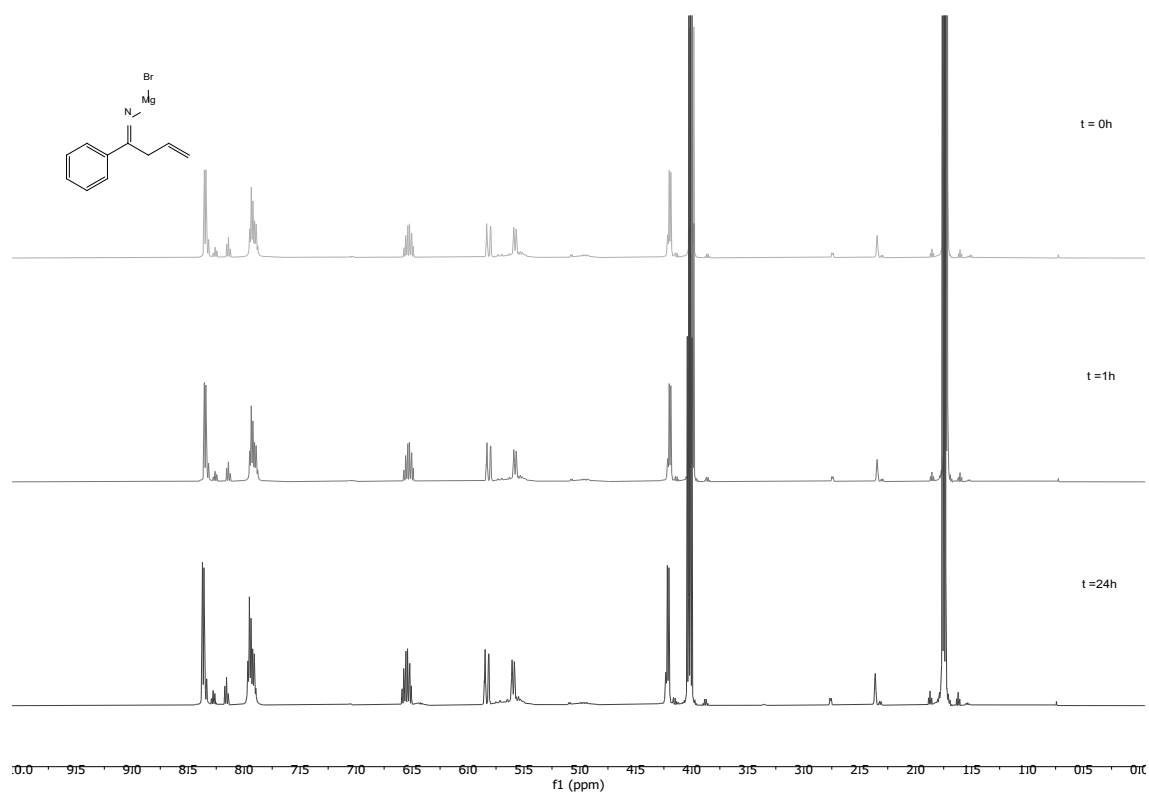

**Figure 47.**  $^1\text{H}$ -NMR full chart of the reaction between allylmagnesium bromide (in  $\text{Et}_2\text{O}$ ) and benzonitrile in  $\text{THF-d}_8$  at different times, under inert atmosphere at room temperature in a Young-valve NMR tube.

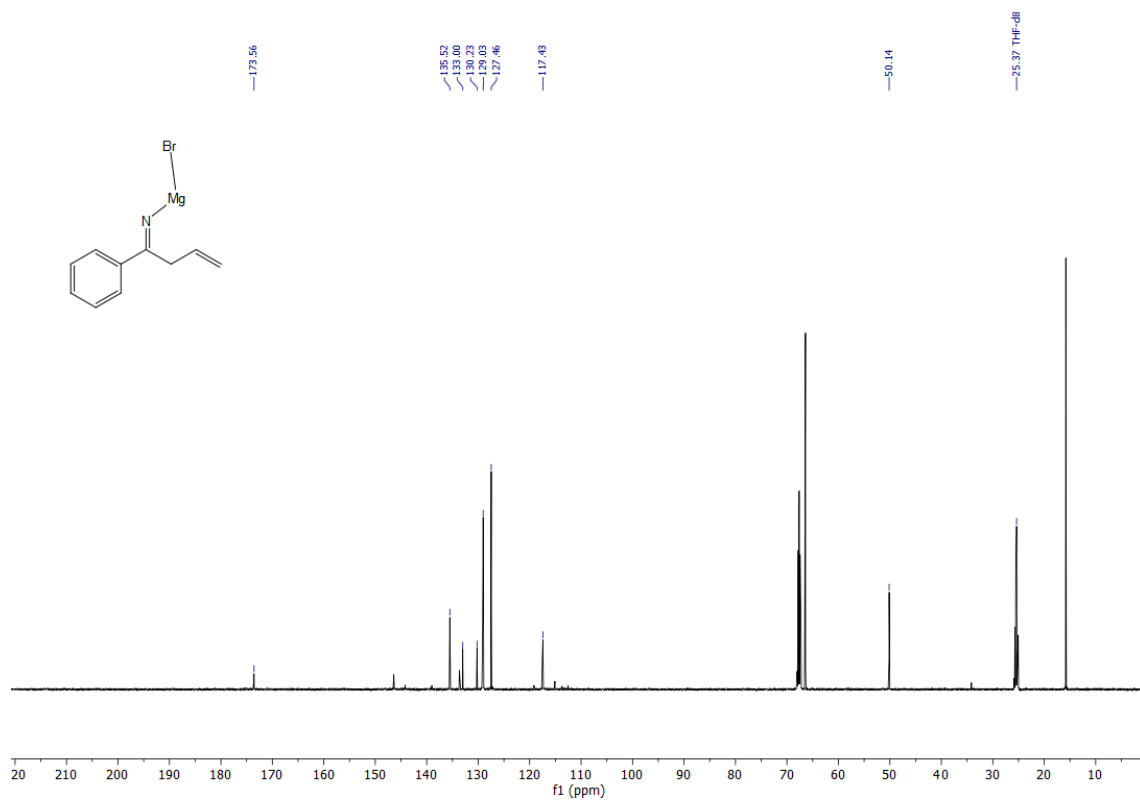

**Figure 48.**  $^{13}\text{C-NMR}$  full chart for I in THF- $d_8$ .

## 4.- Computational methods

### Computational Details.

All the calculations reported in this paper were obtained with the Gaussian 09 suite of programs.<sup>2</sup> All species were optimized using the B3LYP functional<sup>3</sup> in conjunction with the D3 dispersion correction suggested by Grimme et al.<sup>4</sup> using the standard double- $\zeta$  quality def2-SVP<sup>5</sup> basis sets for all atoms. Solvents effects were taken into account during the geometry optimizations using the polarizable continuum model (PCM).<sup>6</sup> This level is denoted PCM(solvent)-B3LYP-D3/def2-SVP. All stationary points were characterized by frequency calculations.<sup>7</sup> Reactants and products have positive definite Hessian matrices, whereas transition structures show only one negative eigenvalue in their diagonalized force constant matrices, and their associated eigenvectors were confirmed to correspond to the motion along the reaction coordinate under consideration using the intrinsic reaction coordinate (IRC) method.<sup>8</sup> Single-point calculations were carried out at the same DFT level using the much larger triple- $\zeta$  quality def2-TZVPP basis set.<sup>5</sup>

**Cartesian coordinates (in Å) and free energies (in a.u.) of all the stationary points discussed in the text. All calculations have been performed at the PCM(solvent)-B3LYP-D3/def2-SVP.**

**IV: G= -1082.832819**

|    |              |              |              |
|----|--------------|--------------|--------------|
| C  | 1.985195000  | 2.414619000  | -0.807358000 |
| C  | 3.072546000  | 1.584977000  | -0.349842000 |
| C  | 3.066867000  | 0.202160000  | -0.334569000 |
| H  | 1.213459000  | 1.917292000  | -1.415088000 |
| C  | 1.858116000  | 3.751301000  | -0.630494000 |
| C  | -2.961356000 | 0.031294000  | 0.431508000  |
| C  | -3.014981000 | 1.163393000  | 1.421674000  |
| C  | -2.473943000 | 2.382965000  | 1.256512000  |
| H  | 2.591281000  | 4.320209000  | -0.048772000 |
| H  | 1.033617000  | 4.310513000  | -1.078928000 |
| H  | -3.560195000 | 0.961423000  | 2.352577000  |
| Mg | 0.038319000  | -0.189121000 | -0.154006000 |
| N  | -1.883812000 | -0.390901000 | -0.092185000 |
| N  | 1.941021000  | -0.556319000 | -0.539836000 |
| H  | -2.568005000 | 3.095005000  | 2.086369000  |
| C  | -4.299618000 | -0.602175000 | 0.109992000  |
| C  | -5.516420000 | 0.039008000  | 0.403258000  |
| C  | -4.342117000 | -1.855555000 | -0.526865000 |
| C  | -6.738944000 | -0.553166000 | 0.066865000  |
| C  | -5.558717000 | -2.452453000 | -0.856180000 |
| C  | -6.764707000 | -1.801786000 | -0.561101000 |
| H  | -5.510368000 | 1.020181000  | 0.883344000  |
| H  | -3.393216000 | -2.344284000 | -0.757948000 |
| H  | -7.674358000 | -0.034972000 | 0.294635000  |
| H  | -5.571888000 | -3.430013000 | -1.346227000 |
| H  | -7.719107000 | -2.267147000 | -0.821431000 |
| C  | 4.342820000  | -0.523732000 | -0.043527000 |
| C  | 5.585325000  | -0.034524000 | -0.492381000 |
| C  | 4.330759000  | -1.734804000 | 0.676512000  |
| C  | 6.769569000  | -0.724099000 | -0.223362000 |
| C  | 5.514590000  | -2.426248000 | 0.945699000  |
| C  | 6.740560000  | -1.923897000 | 0.497008000  |
| H  | 5.615226000  | 0.884894000  | -1.080842000 |
| H  | 3.380068000  | -2.126803000 | 1.045680000  |
| H  | 7.720808000  | -0.328620000 | -0.589448000 |
| H  | 5.479989000  | -3.359397000 | 1.514372000  |
| H  | 7.667258000  | -2.465660000 | 0.703083000  |
| C  | -1.764490000 | 2.898708000  | 0.038699000  |
| H  | -2.132191000 | 3.904266000  | -0.226787000 |
| H  | -0.679757000 | 3.009344000  | 0.217805000  |
| H  | -1.897335000 | 2.236639000  | -0.829268000 |
| H  | 3.967118000  | 2.097154000  | 0.013317000  |
| H  | 2.190986000  | -1.515952000 | -0.776510000 |

**TS: G= -1082.788618**

|   |              |              |             |
|---|--------------|--------------|-------------|
| C | -0.598583000 | 1.199501000  | 0.950299000 |
| C | -1.907791000 | 0.942352000  | 0.494775000 |
| C | -2.533787000 | -0.319961000 | 0.465961000 |
| H | -0.094277000 | 0.428845000  | 1.546145000 |
| C | 0.097897000  | 2.418106000  | 0.762551000 |

|    |              |              |              |
|----|--------------|--------------|--------------|
| C  | 2.568011000  | 0.306603000  | -0.490318000 |
| C  | 2.416994000  | 1.729427000  | -0.611556000 |
| C  | 1.200041000  | 2.422408000  | -0.856631000 |
| H  | -0.529688000 | 3.279088000  | 0.500207000  |
| H  | 0.872409000  | 2.656788000  | 1.494803000  |
| H  | 3.252664000  | 2.347657000  | -0.270818000 |
| Mg | 0.040100000  | -1.471154000 | -0.179784000 |
| N  | 1.609993000  | -0.556819000 | -0.630683000 |
| N  | -1.820231000 | -1.469819000 | 0.561472000  |
| H  | 1.351401000  | 3.510931000  | -0.867645000 |
| C  | 3.956559000  | -0.191173000 | -0.112926000 |
| C  | 4.795054000  | 0.484389000  | 0.792860000  |
| C  | 4.418336000  | -1.405344000 | -0.653031000 |
| C  | 6.043833000  | -0.037207000 | 1.149945000  |
| C  | 5.671634000  | -1.920428000 | -0.315600000 |
| C  | 6.491471000  | -1.239231000 | 0.593138000  |
| H  | 4.459918000  | 1.420106000  | 1.246098000  |
| H  | 3.766834000  | -1.940261000 | -1.348127000 |
| H  | 6.668781000  | 0.498656000  | 1.870130000  |
| H  | 6.013317000  | -2.858742000 | -0.762356000 |
| H  | 7.470030000  | -1.643690000 | 0.865697000  |
| C  | -4.007891000 | -0.391425000 | 0.267230000  |
| C  | -4.864055000 | 0.604073000  | 0.780310000  |
| C  | -4.587594000 | -1.467237000 | -0.436141000 |
| C  | -6.245325000 | 0.528040000  | 0.592802000  |
| C  | -5.968956000 | -1.542702000 | -0.624523000 |
| C  | -6.804875000 | -0.545205000 | -0.110391000 |
| H  | -4.440104000 | 1.431234000  | 1.353295000  |
| H  | -3.943268000 | -2.239350000 | -0.863514000 |
| H  | -6.890871000 | 1.306961000  | 1.006773000  |
| H  | -6.394827000 | -2.380274000 | -1.183108000 |
| H  | -7.886510000 | -0.604573000 | -0.255241000 |
| C  | 0.229919000  | 1.997688000  | -1.944280000 |
| H  | -0.712364000 | 2.565584000  | -1.894203000 |
| H  | 0.688541000  | 2.186831000  | -2.929931000 |
| H  | 0.006109000  | 0.927884000  | -1.877486000 |
| H  | -2.482504000 | 1.792944000  | 0.118800000  |
| H  | -2.410478000 | -2.282340000 | 0.725508000  |

**adduct:** G= -1082.849246

|    |              |              |              |
|----|--------------|--------------|--------------|
| C  | 0.012882000  | 1.365031000  | -1.189739000 |
| C  | 1.301131000  | 0.951999000  | -0.498122000 |
| C  | 1.952369000  | -0.224285000 | -0.762681000 |
| H  | 0.234115000  | 1.307204000  | -2.278740000 |
| C  | -0.400859000 | 2.827797000  | -0.931447000 |
| C  | -2.076857000 | 0.787219000  | -0.043742000 |
| C  | -2.163448000 | 1.986651000  | 0.603109000  |
| C  | -1.130663000 | 3.066075000  | 0.405890000  |
| H  | 0.488359000  | 3.475619000  | -1.014282000 |
| H  | -1.087220000 | 3.123630000  | -1.742447000 |
| H  | -2.955009000 | 2.137144000  | 1.341621000  |
| Mg | -0.537361000 | -1.293931000 | -1.706208000 |
| N  | -1.118523000 | 0.423721000  | -0.958156000 |
| N  | 1.421789000  | -1.230309000 | -1.566594000 |
| H  | -1.646967000 | 4.042356000  | 0.314564000  |



|   |              |              |              |
|---|--------------|--------------|--------------|
| C | -3.089115000 | -0.273898000 | 0.250258000  |
| C | -4.459344000 | -0.060418000 | 0.021579000  |
| C | -2.686865000 | -1.523447000 | 0.762595000  |
| C | -5.396177000 | -1.066110000 | 0.282289000  |
| C | -3.621797000 | -2.532290000 | 1.021407000  |
| C | -4.981435000 | -2.307881000 | 0.776681000  |
| H | -4.781793000 | 0.906724000  | -0.371480000 |
| H | -1.632799000 | -1.683446000 | 1.011250000  |
| H | -6.457040000 | -0.881056000 | 0.092346000  |
| H | -3.290069000 | -3.488835000 | 1.434693000  |
| H | -5.714244000 | -3.093431000 | 0.978404000  |
| C | 3.284811000  | -0.487309000 | -0.130476000 |
| C | 4.230132000  | 0.540785000  | 0.054003000  |
| C | 3.637063000  | -1.785273000 | 0.289582000  |
| C | 5.467454000  | 0.285930000  | 0.649930000  |
| C | 4.875146000  | -2.043247000 | 0.884658000  |
| C | 5.797544000  | -1.008123000 | 1.069621000  |
| H | 3.992374000  | 1.547848000  | -0.295347000 |
| H | 2.918058000  | -2.598104000 | 0.161993000  |
| H | 6.184874000  | 1.101447000  | 0.776528000  |
| H | 5.118376000  | -3.058194000 | 1.211413000  |
| H | 6.767890000  | -1.208555000 | 1.531403000  |
| C | -0.190152000 | 3.189766000  | 1.621021000  |
| H | 0.574028000  | 3.972052000  | 1.465625000  |
| H | -0.763893000 | 3.452345000  | 2.525432000  |
| H | 0.324503000  | 2.238490000  | 1.823456000  |
| H | 1.746310000  | 1.638486000  | 0.222237000  |
| H | 2.134697000  | -1.892269000 | -1.859405000 |

**IV-S:** G= -1392.592260

|    |              |              |              |
|----|--------------|--------------|--------------|
| C  | 1.379820000  | 2.661758000  | -0.289731000 |
| C  | 2.637721000  | 1.972118000  | -0.425983000 |
| C  | 2.799152000  | 0.611929000  | -0.645952000 |
| H  | 0.471614000  | 2.102073000  | -0.555132000 |
| C  | 1.207023000  | 3.949453000  | 0.093222000  |
| C  | -2.876486000 | 0.586311000  | -0.435629000 |
| C  | -2.782727000 | 2.088994000  | -0.429084000 |
| C  | -2.265117000 | 2.853734000  | 0.547909000  |
| H  | 2.057486000  | 4.581628000  | 0.372102000  |
| H  | 0.213921000  | 4.403433000  | 0.118918000  |
| H  | -3.197034000 | 2.596898000  | -1.309811000 |
| Mg | -0.020893000 | -0.453444000 | 0.284725000  |
| N  | -1.921253000 | -0.192042000 | -0.139827000 |
| N  | 1.799942000  | -0.314267000 | -0.576985000 |
| H  | -2.246862000 | 3.938614000  | 0.383996000  |
| C  | -4.233094000 | 0.051575000  | -0.864771000 |
| C  | -4.333361000 | -1.240337000 | -1.410514000 |
| C  | -5.412393000 | 0.800856000  | -0.709263000 |
| C  | -5.568360000 | -1.768279000 | -1.788708000 |
| C  | -6.655480000 | 0.270248000  | -1.073725000 |
| C  | -6.737976000 | -1.014921000 | -1.617826000 |
| H  | -3.413866000 | -1.816570000 | -1.535698000 |
| H  | -5.359892000 | 1.805680000  | -0.282536000 |
| H  | -5.623832000 | -2.770850000 | -2.222530000 |
| H  | -7.562726000 | 0.864269000  | -0.932351000 |

|   |              |              |              |
|---|--------------|--------------|--------------|
| H | -7.707030000 | -1.427997000 | -1.910556000 |
| C | 4.185836000  | 0.109457000  | -0.918954000 |
| C | 5.081840000  | 0.824466000  | -1.736687000 |
| C | 4.626488000  | -1.109248000 | -0.367021000 |
| C | 6.369713000  | 0.343531000  | -1.986035000 |
| C | 5.915404000  | -1.590203000 | -0.611069000 |
| C | 6.794227000  | -0.865647000 | -1.423477000 |
| H | 4.750747000  | 1.757828000  | -2.197044000 |
| H | 3.952493000  | -1.674638000 | 0.280017000  |
| H | 7.043745000  | 0.911977000  | -2.632625000 |
| H | 6.237184000  | -2.533002000 | -0.160184000 |
| H | 7.801312000  | -1.242347000 | -1.620397000 |
| C | -1.708045000 | 2.385782000  | 1.858911000  |
| H | -0.606065000 | 2.439844000  | 1.845471000  |
| H | -2.049943000 | 3.033691000  | 2.683396000  |
| H | -1.989634000 | 1.347196000  | 2.073688000  |
| H | 3.542754000  | 2.579658000  | -0.340006000 |
| H | 2.108201000  | -1.187622000 | -1.004479000 |
| O | -0.017682000 | -2.513344000 | 0.650224000  |
| C | 1.115384000  | -3.152338000 | 1.226572000  |
| H | 1.423985000  | -4.019443000 | 0.618267000  |
| H | 1.925492000  | -2.412582000 | 1.250207000  |
| H | 0.890049000  | -3.488368000 | 2.253664000  |
| O | 0.376531000  | -0.147701000 | 2.302497000  |
| C | 1.546014000  | 0.505328000  | 2.797834000  |
| H | 2.171685000  | -0.209199000 | 3.359812000  |
| H | 2.100227000  | 0.887519000  | 1.931596000  |
| H | 1.262200000  | 1.344058000  | 3.455230000  |
| C | -1.177622000 | -3.340239000 | 0.541405000  |
| H | -0.985042000 | -4.181314000 | -0.146404000 |
| H | -1.457355000 | -3.735420000 | 1.533668000  |
| H | -1.975429000 | -2.692489000 | 0.155468000  |
| C | -0.479139000 | -0.679509000 | 3.307787000  |
| H | -1.350775000 | -1.115291000 | 2.802240000  |
| H | 0.044179000  | -1.460842000 | 3.885703000  |
| H | -0.815618000 | 0.118558000  | 3.990244000  |

**TS-S:** G= -1392.549185

|    |              |              |              |
|----|--------------|--------------|--------------|
| C  | -0.612256000 | -2.045785000 | -0.967308000 |
| C  | -1.925449000 | -1.709435000 | -0.577810000 |
| C  | -2.546134000 | -0.467758000 | -0.824171000 |
| H  | -0.106015000 | -1.383592000 | -1.676497000 |
| C  | 0.073197000  | -3.216484000 | -0.559572000 |
| C  | 2.579872000  | -0.950248000 | 0.136888000  |
| C  | 2.434993000  | -2.313345000 | 0.600066000  |
| C  | 1.215679000  | -2.921114000 | 1.001038000  |
| H  | -0.561410000 | -4.005499000 | -0.135281000 |
| H  | 0.834976000  | -3.600078000 | -1.242355000 |
| H  | 3.237931000  | -3.002561000 | 0.311908000  |
| Mg | -0.019772000 | 0.858860000  | -0.166121000 |
| N  | 1.626287000  | -0.096467000 | 0.002283000  |
| N  | -1.811350000 | 0.633250000  | -1.106422000 |
| H  | 1.348605000  | -3.987564000 | 1.231024000  |
| C  | 3.991763000  | -0.561334000 | -0.291177000 |
| C  | 4.184896000  | 0.287235000  | -1.394719000 |

|   |              |              |              |
|---|--------------|--------------|--------------|
| C | 5.125959000  | -0.988486000 | 0.420103000  |
| C | 5.465151000  | 0.688248000  | -1.783308000 |
| C | 6.410752000  | -0.576288000 | 0.046327000  |
| C | 6.586989000  | 0.261329000  | -1.059860000 |
| H | 3.301287000  | 0.623324000  | -1.943185000 |
| H | 4.993315000  | -1.638838000 | 1.289131000  |
| H | 5.592882000  | 1.335984000  | -2.655865000 |
| H | 7.278293000  | -0.908860000 | 0.624025000  |
| H | 7.589817000  | 0.580941000  | -1.356404000 |
| C | -4.027807000 | -0.358754000 | -0.701994000 |
| C | -4.871358000 | -1.461603000 | -0.952112000 |
| C | -4.634347000 | 0.862921000  | -0.340104000 |
| C | -6.257462000 | -1.349900000 | -0.833945000 |
| C | -6.021364000 | 0.976015000  | -0.223436000 |
| C | -6.841276000 | -0.130649000 | -0.468573000 |
| H | -4.431404000 | -2.409506000 | -1.267966000 |
| H | -4.008203000 | 1.732435000  | -0.126928000 |
| H | -6.888877000 | -2.218304000 | -1.039717000 |
| H | -6.464311000 | 1.932500000  | 0.066705000  |
| H | -7.927133000 | -0.043474000 | -0.380223000 |
| C | 0.281902000  | -2.255690000 | 1.996887000  |
| H | -0.657357000 | -2.819273000 | 2.114308000  |
| H | 0.773072000  | -2.201849000 | 2.983662000  |
| H | 0.039897000  | -1.235485000 | 1.684050000  |
| H | -2.507174000 | -2.472667000 | -0.053205000 |
| H | -2.379467000 | 1.389767000  | -1.482246000 |
| O | 0.476074000  | 2.851666000  | -0.410465000 |
| C | -0.480949000 | 3.890550000  | -0.239523000 |
| H | -0.371117000 | 4.652859000  | -1.029061000 |
| H | -1.477188000 | 3.434293000  | -0.308163000 |
| H | -0.364707000 | 4.365624000  | 0.749896000  |
| O | -0.595666000 | 1.237554000  | 1.818045000  |
| C | -1.852524000 | 0.917484000  | 2.407246000  |
| H | -2.203879000 | 1.751113000  | 3.039059000  |
| H | -2.560749000 | 0.745912000  | 1.589438000  |
| H | -1.770457000 | 0.001782000  | 3.016834000  |
| C | 1.840317000  | 3.281135000  | -0.382965000 |
| H | 2.046464000  | 3.947230000  | -1.237696000 |
| H | 2.051851000  | 3.815338000  | 0.559472000  |
| H | 2.450567000  | 2.370060000  | -0.442145000 |
| C | 0.453244000  | 1.462547000  | 2.759731000  |
| H | 1.375890000  | 1.623988000  | 2.188402000  |
| H | 0.224782000  | 2.345506000  | 3.380611000  |
| H | 0.586537000  | 0.577802000  | 3.403925000  |

**adduct-S: G= -1392.613686**

|   |              |              |             |
|---|--------------|--------------|-------------|
| C | -0.493107000 | 1.250134000  | 1.577159000 |
| C | -1.795572000 | 1.004197000  | 0.831126000 |
| C | -2.278127000 | -0.251723000 | 0.563494000 |
| H | -0.577053000 | 0.656167000  | 2.514113000 |
| C | -0.316555000 | 2.719863000  | 2.001999000 |
| C | 1.493497000  | 1.618317000  | 0.208355000 |
| C | 1.302322000  | 2.975095000  | 0.140911000 |
| C | 0.171228000  | 3.651289000  | 0.872040000 |
| H | -1.259220000 | 3.091216000  | 2.439421000 |

|                          |              |              |              |
|--------------------------|--------------|--------------|--------------|
| H                        | 0.440938000  | 2.747853000  | 2.803819000  |
| H                        | 2.022472000  | 3.593805000  | -0.399803000 |
| Mg                       | 0.430816000  | -1.237047000 | 0.589894000  |
| N                        | 0.715460000  | 0.721258000  | 0.893043000  |
| N                        | -1.547157000 | -1.401851000 | 0.798998000  |
| H                        | 0.566606000  | 4.561439000  | 1.365585000  |
| C                        | 2.689036000  | 1.034707000  | -0.480763000 |
| C                        | 3.478762000  | 0.051275000  | 0.146962000  |
| C                        | 3.069098000  | 1.449254000  | -1.772257000 |
| C                        | 4.610904000  | -0.480209000 | -0.477309000 |
| C                        | 4.200599000  | 0.919340000  | -2.400113000 |
| C                        | 4.980823000  | -0.048053000 | -1.755719000 |
| H                        | 3.208914000  | -0.277634000 | 1.151023000  |
| H                        | 2.457237000  | 2.193376000  | -2.286905000 |
| H                        | 5.212016000  | -1.232662000 | 0.041035000  |
| H                        | 4.470075000  | 1.258806000  | -3.404117000 |
| H                        | 5.864276000  | -0.463507000 | -2.247261000 |
| C                        | -3.623204000 | -0.395229000 | -0.081882000 |
| C                        | -4.701065000 | 0.449123000  | 0.249383000  |
| C                        | -3.848355000 | -1.396457000 | -1.047595000 |
| C                        | -5.945442000 | 0.309558000  | -0.369859000 |
| C                        | -5.092174000 | -1.538233000 | -1.669335000 |
| C                        | -6.148803000 | -0.684903000 | -1.334283000 |
| H                        | -4.557140000 | 1.211743000  | 1.018036000  |
| H                        | -3.025122000 | -2.059743000 | -1.324331000 |
| H                        | -6.766945000 | 0.974821000  | -0.089415000 |
| H                        | -5.235840000 | -2.317116000 | -2.423724000 |
| H                        | -7.124096000 | -0.797048000 | -1.815323000 |
| C                        | -0.938162000 | 4.137950000  | -0.082105000 |
| H                        | -1.776657000 | 4.600179000  | 0.469488000  |
| H                        | -0.536610000 | 4.891626000  | -0.780199000 |
| H                        | -1.336130000 | 3.309433000  | -0.686068000 |
| H                        | -2.391514000 | 1.863863000  | 0.525697000  |
| H                        | -2.132667000 | -2.231532000 | 0.751196000  |
| O                        | 1.523909000  | -2.293474000 | 1.976810000  |
| C                        | 1.620397000  | -3.715264000 | 2.049226000  |
| H                        | 0.931904000  | -4.111167000 | 2.814307000  |
| H                        | 1.343320000  | -4.117357000 | 1.064993000  |
| H                        | 2.653633000  | -4.016116000 | 2.289526000  |
| O                        | 0.786041000  | -1.642694000 | -1.415431000 |
| C                        | 0.041339000  | -0.764553000 | -2.272450000 |
| H                        | -0.304419000 | -1.316392000 | -3.161746000 |
| H                        | -0.822029000 | -0.397338000 | -1.702781000 |
| H                        | 0.672444000  | 0.086369000  | -2.573408000 |
| C                        | 1.861285000  | -1.612382000 | 3.192945000  |
| H                        | 1.193445000  | -1.937962000 | 4.007213000  |
| H                        | 2.910047000  | -1.820204000 | 3.460765000  |
| H                        | 1.725236000  | -0.539316000 | 2.999921000  |
| C                        | 1.936032000  | -2.215942000 | -2.036685000 |
| H                        | 2.432412000  | -2.852591000 | -1.293192000 |
| H                        | 1.631107000  | -2.829712000 | -2.900927000 |
| H                        | 2.633309000  | -1.428157000 | -2.360476000 |
| <b>A: G= -441.956270</b> |              |              |              |
| C                        | 0.875985000  | 0.295787000  | 0.268975000  |

|   |              |              |              |
|---|--------------|--------------|--------------|
| C | 1.738037000  | -0.896435000 | -0.107260000 |
| C | 3.223005000  | -0.764223000 | -0.334792000 |
| H | 1.297203000  | -1.365224000 | -1.005950000 |
| N | 1.393940000  | 1.378617000  | 0.711788000  |
| H | 3.679649000  | -1.722362000 | -0.617813000 |
| C | -0.606591000 | 0.104434000  | 0.103784000  |
| C | -1.222647000 | -1.143004000 | 0.316411000  |
| C | -1.414856000 | 1.195570000  | -0.267406000 |
| C | -2.607192000 | -1.285977000 | 0.187962000  |
| C | -2.796400000 | 1.049901000  | -0.408471000 |
| C | -3.398647000 | -0.191707000 | -0.176038000 |
| H | -0.626437000 | -2.010565000 | 0.604352000  |
| H | -0.954845000 | 2.166203000  | -0.470006000 |
| H | -3.069111000 | -2.259017000 | 0.372779000  |
| H | -3.403976000 | 1.907453000  | -0.708067000 |
| H | -4.480016000 | -0.307033000 | -0.283738000 |
| C | 4.016286000  | 0.309830000  | -0.258877000 |
| H | 5.084092000  | 0.217919000  | -0.480992000 |
| H | 3.625445000  | 1.285427000  | 0.029787000  |
| H | 0.662270000  | 2.056006000  | 0.954192000  |
| H | 1.586279000  | -1.664170000 | 0.677210000  |

**B: G= -441.966263**

|   |              |              |              |
|---|--------------|--------------|--------------|
| C | -0.881893000 | -0.196253000 | 0.137938000  |
| C | -1.710764000 | 0.826277000  | -0.247856000 |
| C | -3.164112000 | 0.862340000  | -0.228149000 |
| H | -1.223268000 | 1.738234000  | -0.597787000 |
| N | -1.329119000 | -1.429792000 | 0.575755000  |
| H | -3.581398000 | 1.878451000  | -0.239995000 |
| C | 0.598772000  | -0.054266000 | 0.053875000  |
| C | 1.236956000  | 1.172945000  | 0.320174000  |
| C | 1.399688000  | -1.161151000 | -0.292469000 |
| C | 2.625298000  | 1.291864000  | 0.230022000  |
| C | 2.789177000  | -1.040629000 | -0.381769000 |
| C | 3.408537000  | 0.186160000  | -0.122225000 |
| H | 0.640418000  | 2.035683000  | 0.623472000  |
| H | 0.926663000  | -2.119896000 | -0.515994000 |
| H | 3.099958000  | 2.252066000  | 0.447790000  |
| H | 3.389684000  | -1.910051000 | -0.661545000 |
| H | 4.495295000  | 0.280087000  | -0.189213000 |
| C | -4.057791000 | -0.153933000 | -0.218208000 |
| H | -5.131069000 | 0.053077000  | -0.191171000 |
| H | -3.772137000 | -1.205493000 | -0.299961000 |
| H | -0.705166000 | -1.922342000 | 1.208499000  |
| H | -2.298347000 | -1.471393000 | 0.877617000  |

**TS1: G= -441.928633**

|   |              |              |              |
|---|--------------|--------------|--------------|
| C | -0.899201000 | -0.229007000 | -0.103478000 |
| C | -1.720243000 | 0.855417000  | -0.534304000 |
| C | -3.069713000 | 0.885609000  | -0.203519000 |
| H | -1.232266000 | 1.764058000  | -0.888399000 |
| N | -1.472778000 | -1.344535000 | 0.341354000  |
| H | -3.541495000 | 1.876919000  | -0.148860000 |
| C | 0.582969000  | -0.068550000 | -0.047631000 |
| C | 1.188997000  | 1.172639000  | 0.226660000  |

|   |              |              |              |
|---|--------------|--------------|--------------|
| C | 1.411884000  | -1.186071000 | -0.269172000 |
| C | 2.579686000  | 1.289085000  | 0.285341000  |
| C | 2.802759000  | -1.067873000 | -0.213671000 |
| C | 3.391270000  | 0.170272000  | 0.064682000  |
| H | 0.567976000  | 2.048946000  | 0.421440000  |
| H | 0.962104000  | -2.151870000 | -0.511788000 |
| H | 3.032060000  | 2.257851000  | 0.511533000  |
| H | 3.428849000  | -1.944633000 | -0.396847000 |
| H | 4.479234000  | 0.264018000  | 0.108204000  |
| C | -3.799663000 | -0.262326000 | 0.235343000  |
| H | -4.756432000 | -0.070173000 | 0.737918000  |
| H | -3.875623000 | -1.094133000 | -0.481946000 |
| H | -2.716867000 | -0.994601000 | 0.681811000  |
| H | -0.850556000 | -1.899816000 | 0.935954000  |

**TS1': G= -594.651864**

|   |              |              |              |
|---|--------------|--------------|--------------|
| C | -0.005131000 | -0.083979000 | -0.121257000 |
| C | 0.595834000  | -1.371388000 | -0.291704000 |
| C | 1.858234000  | -1.693621000 | -0.742130000 |
| H | -0.083314000 | -2.209732000 | -0.132318000 |
| N | 0.646416000  | 1.060471000  | -0.070381000 |
| H | 2.043080000  | -2.774312000 | -0.796411000 |
| C | -1.491681000 | -0.018609000 | -0.012534000 |
| C | -2.202768000 | -0.942909000 | 0.775116000  |
| C | -2.203610000 | 0.984234000  | -0.698232000 |
| C | -3.592027000 | -0.855033000 | 0.883895000  |
| C | -3.594356000 | 1.057995000  | -0.599331000 |
| C | -4.291907000 | 0.141482000  | 0.194713000  |
| H | -1.667604000 | -1.716248000 | 1.329181000  |
| H | -1.671801000 | 1.693409000  | -1.337151000 |
| H | -4.129909000 | -1.568555000 | 1.512420000  |
| H | -4.134754000 | 1.831673000  | -1.149644000 |
| H | -5.379871000 | 0.202436000  | 0.274903000  |
| C | 2.970665000  | -0.857687000 | -1.120861000 |
| H | 3.657816000  | -1.359516000 | -1.816906000 |
| H | 2.701909000  | 0.148639000  | -1.470367000 |
| H | 3.627651000  | -0.618241000 | -0.123572000 |
| H | 0.090833000  | 1.897120000  | 0.091946000  |
| O | 4.354235000  | -0.081661000 | 1.092387000  |
| H | 3.767553000  | -0.476233000 | 1.756101000  |
| H | 3.687411000  | 1.092455000  | 0.779361000  |
| H | 1.696304000  | 1.247940000  | 0.041207000  |
| O | 3.080990000  | 1.929777000  | 0.443255000  |
| H | 3.528467000  | 2.238037000  | -0.357271000 |

**C: G= -441.965819**

|   |              |              |              |
|---|--------------|--------------|--------------|
| C | -0.851219000 | -0.467477000 | -0.102758000 |
| C | -1.719726000 | 0.596778000  | -0.662710000 |
| C | -3.028407000 | 0.806062000  | -0.411529000 |
| H | -1.219590000 | 1.298835000  | -1.336823000 |
| N | -1.352203000 | -1.584758000 | 0.295944000  |
| H | -3.489436000 | 1.655352000  | -0.931977000 |
| C | 0.618784000  | -0.162588000 | -0.048552000 |
| C | 1.079865000  | 1.133494000  | 0.245811000  |
| C | 1.564997000  | -1.180440000 | -0.269286000 |

|   |              |              |              |
|---|--------------|--------------|--------------|
| C | 2.449092000  | 1.398633000  | 0.339463000  |
| C | 2.933276000  | -0.912925000 | -0.189288000 |
| C | 3.379664000  | 0.377351000  | 0.119715000  |
| H | 0.361575000  | 1.937206000  | 0.423408000  |
| H | 1.226687000  | -2.187515000 | -0.526920000 |
| H | 2.790214000  | 2.407657000  | 0.584292000  |
| H | 3.654325000  | -1.712734000 | -0.375712000 |
| H | 4.450328000  | 0.586995000  | 0.183850000  |
| C | -3.941591000 | 0.040705000  | 0.493690000  |
| H | -4.585807000 | 0.730900000  | 1.063287000  |
| H | -4.619810000 | -0.594457000 | -0.105652000 |
| H | -3.394157000 | -0.623270000 | 1.173464000  |
| H | -0.617311000 | -2.183219000 | 0.689847000  |

**TS2:** G= -883.881967

|   |              |              |              |
|---|--------------|--------------|--------------|
| C | 0.313121000  | -0.987962000 | 1.218994000  |
| C | 1.538922000  | -0.313222000 | 1.007340000  |
| C | 2.728018000  | -0.740565000 | 0.420083000  |
| H | -0.416572000 | -0.403453000 | 1.783884000  |
| C | -0.139378000 | -2.262187000 | 0.793767000  |
| C | -2.402334000 | -0.120447000 | -0.485712000 |
| C | -2.257048000 | -1.504342000 | -0.784415000 |
| C | -1.005527000 | -2.160774000 | -0.948570000 |
| H | 0.592204000  | -3.035663000 | 0.544548000  |
| H | -0.970961000 | -2.675425000 | 1.368506000  |
| H | -3.135869000 | -2.138390000 | -0.641897000 |
| N | -1.361981000 | 0.688447000  | -0.448500000 |
| N | 2.972241000  | -2.009833000 | 0.012198000  |
| H | -1.124328000 | -3.244428000 | -1.088131000 |
| C | -3.779978000 | 0.383158000  | -0.144476000 |
| C | -4.650788000 | -0.335144000 | 0.695597000  |
| C | -4.213674000 | 1.625318000  | -0.645306000 |
| C | -5.910171000 | 0.173754000  | 1.027889000  |
| C | -5.475628000 | 2.131562000  | -0.322450000 |
| C | -6.329267000 | 1.407702000  | 0.517983000  |
| H | -4.329675000 | -1.293563000 | 1.109975000  |
| H | -3.554497000 | 2.192705000  | -1.307729000 |
| H | -6.565936000 | -0.394691000 | 1.692892000  |
| H | -5.795763000 | 3.093327000  | -0.732134000 |
| H | -7.315390000 | 1.803385000  | 0.774480000  |
| C | 3.845582000  | 0.221482000  | 0.234675000  |
| C | 3.593119000  | 1.558227000  | -0.133328000 |
| C | 5.183890000  | -0.184722000 | 0.411876000  |
| C | 4.644582000  | 2.459322000  | -0.310367000 |
| C | 6.233662000  | 0.719426000  | 0.236210000  |
| C | 5.968982000  | 2.044830000  | -0.125820000 |
| H | 2.565321000  | 1.883379000  | -0.306633000 |
| H | 5.405239000  | -1.209757000 | 0.718760000  |
| H | 4.429008000  | 3.489546000  | -0.604525000 |
| H | 7.263562000  | 0.388026000  | 0.390565000  |
| H | 6.790929000  | 2.751110000  | -0.266297000 |
| C | 0.081640000  | -1.597620000 | -1.849463000 |
| H | 0.995788000  | -2.207903000 | -1.809130000 |
| H | -0.284524000 | -1.597061000 | -2.890732000 |
| H | 0.321711000  | -0.565311000 | -1.571019000 |

|   |              |              |              |
|---|--------------|--------------|--------------|
| H | 1.562240000  | 0.713470000  | 1.375274000  |
| H | -1.648073000 | 1.596641000  | -0.068406000 |
| H | 2.336489000  | -2.766156000 | 0.216082000  |
| H | 3.800921000  | -2.236868000 | -0.521265000 |

**TS2':** G= -883.867438

|   |              |              |              |
|---|--------------|--------------|--------------|
| C | -0.102073000 | -1.591277000 | -1.280885000 |
| C | -1.390948000 | -0.963851000 | -1.775535000 |
| C | -2.616273000 | -1.023550000 | -0.873171000 |
| H | 0.738034000  | -1.408840000 | -1.955461000 |
| C | -0.011335000 | -2.682259000 | -0.421198000 |
| C | 1.811496000  | -0.232270000 | 0.474584000  |
| C | 1.699200000  | -1.343236000 | 1.343041000  |
| C | 0.495807000  | -2.029252000 | 1.566736000  |
| H | -0.938077000 | -3.160303000 | -0.100340000 |
| H | 0.861505000  | -3.330602000 | -0.508007000 |
| H | 2.626342000  | -1.844903000 | 1.632282000  |
| N | 0.730483000  | 0.191264000  | -0.168190000 |
| N | -3.118566000 | -2.173529000 | -0.611857000 |
| H | 0.622678000  | -3.015296000 | 2.033133000  |
| C | 3.163538000  | 0.336061000  | 0.164720000  |
| C | 4.304498000  | -0.475385000 | 0.018883000  |
| C | 3.307627000  | 1.725937000  | -0.011270000 |
| C | 5.545885000  | 0.084446000  | -0.296518000 |
| C | 4.549244000  | 2.287118000  | -0.321125000 |
| C | 5.674108000  | 1.467647000  | -0.465891000 |
| H | 4.217659000  | -1.558263000 | 0.129662000  |
| H | 2.437461000  | 2.375662000  | 0.114067000  |
| H | 6.416799000  | -0.564994000 | -0.417622000 |
| H | 4.639635000  | 3.369548000  | -0.443773000 |
| H | 6.645861000  | 1.904524000  | -0.709521000 |
| C | -3.206523000 | 0.265501000  | -0.386431000 |
| C | -2.394691000 | 1.360841000  | -0.036569000 |
| C | -4.603076000 | 0.392300000  | -0.260213000 |
| C | -2.967010000 | 2.539443000  | 0.449961000  |
| C | -5.173675000 | 1.576946000  | 0.210657000  |
| C | -4.356266000 | 2.654260000  | 0.571446000  |
| H | -1.308902000 | 1.266480000  | -0.108744000 |
| H | -5.252588000 | -0.435828000 | -0.555828000 |
| H | -2.322083000 | 3.374439000  | 0.735916000  |
| H | -6.260465000 | 1.661735000  | 0.289236000  |
| H | -4.801600000 | 3.581278000  | 0.941486000  |
| C | -0.801282000 | -1.362556000 | 1.962998000  |
| H | -1.658813000 | -2.041424000 | 1.860998000  |
| H | -0.726391000 | -1.075410000 | 3.027386000  |
| H | -0.991393000 | -0.458268000 | 1.379533000  |
| H | -1.194607000 | 0.068745000  | -2.092426000 |
| H | 0.990131000  | 0.841067000  | -0.916925000 |
| H | -3.925756000 | -2.082686000 | 0.015596000  |
| H | -1.668364000 | -1.511997000 | -2.695637000 |

**D:** G= -883.962652

|   |              |              |              |
|---|--------------|--------------|--------------|
| C | -0.035565000 | -1.235790000 | -0.914980000 |
| C | -1.473392000 | -0.773527000 | -0.888043000 |
| C | -2.044800000 | -0.005893000 | 0.079109000  |



|   |              |              |              |
|---|--------------|--------------|--------------|
| H | 0.198712000  | -1.548884000 | -1.953103000 |
| C | 0.217327000  | -2.457096000 | -0.012655000 |
| C | 2.219448000  | -0.487939000 | -0.243433000 |
| C | 2.615059000  | -1.767412000 | -0.034219000 |
| C | 1.671655000  | -2.946131000 | -0.104112000 |
| H | -0.013672000 | -2.174979000 | 1.029341000  |
| H | -0.480272000 | -3.261771000 | -0.291587000 |
| H | 3.649740000  | -1.956380000 | 0.260842000  |
| N | 0.883446000  | -0.161593000 | -0.515176000 |
| N | -1.366570000 | 0.413613000  | 1.223667000  |
| H | 1.799721000  | -3.446495000 | -1.085203000 |
| C | 3.143003000  | 0.671796000  | -0.117213000 |
| C | 4.501868000  | 0.564265000  | -0.472044000 |
| C | 2.677718000  | 1.911873000  | 0.364471000  |
| C | 5.367826000  | 1.650819000  | -0.332689000 |
| C | 3.544821000  | 2.999882000  | 0.500884000  |
| C | 4.894242000  | 2.874779000  | 0.155418000  |
| H | 4.877044000  | -0.376504000 | -0.880463000 |
| H | 1.630144000  | 2.020217000  | 0.653741000  |
| H | 6.417559000  | 1.544821000  | -0.618714000 |
| H | 3.162796000  | 3.949609000  | 0.884409000  |
| H | 5.571621000  | 3.726126000  | 0.259414000  |
| C | -3.488921000 | 0.359769000  | 0.023379000  |
| C | -4.139576000 | 0.601652000  | -1.201985000 |
| C | -4.240368000 | 0.473968000  | 1.209736000  |
| C | -5.497389000 | 0.926398000  | -1.240957000 |
| C | -5.598664000 | 0.801663000  | 1.170225000  |
| C | -6.234659000 | 1.027341000  | -0.054969000 |
| H | -3.567790000 | 0.554644000  | -2.131189000 |
| H | -3.756757000 | 0.283817000  | 2.170198000  |
| H | -5.980405000 | 1.114304000  | -2.203473000 |
| H | -6.163810000 | 0.876069000  | 2.103073000  |
| H | -7.295993000 | 1.286468000  | -0.086170000 |
| C | 1.983977000  | -3.986137000 | 0.979432000  |
| H | 1.303383000  | -4.850251000 | 0.907887000  |
| H | 3.017079000  | -4.359374000 | 0.887357000  |
| H | 1.873239000  | -3.546721000 | 1.985249000  |
| H | -2.117533000 | -1.172696000 | -1.673109000 |
| H | 0.769855000  | 0.676915000  | -1.079164000 |
| H | -0.352790000 | 0.354246000  | 1.123358000  |
| H | -1.661657000 | 1.316988000  | 1.585745000  |

**E:** G= -883.958895

|   |              |             |              |
|---|--------------|-------------|--------------|
| C | -0.008682000 | 1.182918000 | -1.028990000 |
| C | 1.432322000  | 0.657501000 | -1.051696000 |
| C | 2.073566000  | 0.164240000 | 0.233942000  |
| H | -0.219120000 | 1.501729000 | -2.072696000 |
| C | -0.233133000 | 2.413697000 | -0.143918000 |
| C | -2.241839000 | 0.454181000 | -0.294594000 |
| C | -2.630087000 | 1.738358000 | -0.081330000 |
| C | -1.685577000 | 2.910399000 | -0.236170000 |
| H | -0.002479000 | 2.145167000 | 0.896987000  |
| H | 0.467228000  | 3.208488000 | -0.448718000 |
| H | -3.639237000 | 1.929442000 | 0.290787000  |
| N | -0.938922000 | 0.126276000 | -0.652894000 |

|   |              |              |              |
|---|--------------|--------------|--------------|
| N | 1.447284000  | 0.195348000  | 1.348838000  |
| H | -1.830674000 | 3.362977000  | -1.238351000 |
| C | -3.150109000 | -0.704120000 | -0.075224000 |
| C | -4.524688000 | -0.624454000 | -0.369333000 |
| C | -2.647719000 | -1.914537000 | 0.442680000  |
| C | -5.370334000 | -1.712340000 | -0.139815000 |
| C | -3.494082000 | -3.003562000 | 0.669159000  |
| C | -4.859610000 | -2.907761000 | 0.380523000  |
| H | -4.927706000 | 0.294724000  | -0.800166000 |
| H | -1.586176000 | -1.989522000 | 0.688639000  |
| H | -6.433730000 | -1.630294000 | -0.379802000 |
| H | -3.084320000 | -3.930413000 | 1.079431000  |
| H | -5.521307000 | -3.760039000 | 0.554815000  |
| C | 3.491983000  | -0.318854000 | 0.108709000  |
| C | 3.924717000  | -1.090751000 | -0.984982000 |
| C | 4.423059000  | -0.002213000 | 1.116311000  |
| C | 5.242594000  | -1.551928000 | -1.055425000 |
| C | 5.742933000  | -0.451555000 | 1.039474000  |
| C | 6.156375000  | -1.232452000 | -0.045864000 |
| H | 3.226514000  | -1.356199000 | -1.780866000 |
| H | 4.114062000  | 0.620789000  | 1.959665000  |
| H | 5.556090000  | -2.164365000 | -1.904566000 |
| H | 6.453038000  | -0.185345000 | 1.826403000  |
| H | 7.188409000  | -1.586805000 | -0.106407000 |
| C | -1.968309000 | 4.004710000  | 0.800002000  |
| H | -1.287611000 | 4.862037000  | 0.669787000  |
| H | -3.002508000 | 4.376835000  | 0.714376000  |
| H | -1.834830000 | 3.615727000  | 1.823729000  |
| H | 2.086528000  | 1.443613000  | -1.468274000 |
| H | -0.841331000 | -0.732631000 | -1.184921000 |
| H | 2.035289000  | -0.185275000 | 2.099411000  |
| H | 1.485055000  | -0.160854000 | -1.791616000 |

**B-H: G= -442.385147**

|   |              |              |              |
|---|--------------|--------------|--------------|
| C | 0.840815000  | 0.098428000  | 0.115733000  |
| C | 1.718659000  | -0.891620000 | -0.143071000 |
| C | 3.178707000  | -0.865581000 | -0.020672000 |
| H | 1.283784000  | -1.852500000 | -0.431515000 |
| N | 1.368958000  | 1.404916000  | 0.572543000  |
| H | 3.612489000  | -1.768584000 | 0.425739000  |
| C | -0.630745000 | 0.017294000  | 0.040077000  |
| C | -1.285639000 | -1.221036000 | 0.204391000  |
| C | -1.413813000 | 1.164388000  | -0.199499000 |
| C | -2.673724000 | -1.308186000 | 0.112998000  |
| C | -2.805378000 | 1.072746000  | -0.285047000 |
| C | -3.440379000 | -0.162286000 | -0.132470000 |
| H | -0.707838000 | -2.119036000 | 0.430015000  |
| H | -0.954289000 | 2.144003000  | -0.346998000 |
| H | -3.162016000 | -2.275894000 | 0.248902000  |
| H | -3.391943000 | 1.973840000  | -0.477486000 |
| H | -4.528603000 | -0.232537000 | -0.197528000 |
| C | 4.008405000  | 0.107294000  | -0.437567000 |
| H | 5.087700000  | 0.016760000  | -0.292381000 |
| H | 3.662428000  | 0.992557000  | -0.979986000 |
| H | 0.823536000  | 1.777593000  | 1.363756000  |

|   |             |             |              |
|---|-------------|-------------|--------------|
| H | 2.350389000 | 1.314717000 | 0.883607000  |
| H | 1.360215000 | 2.126019000 | -0.163168000 |

**TS1-H: G= -518.730298**

|   |              |              |              |
|---|--------------|--------------|--------------|
| C | -0.465741000 | -0.168213000 | -0.406926000 |
| C | -1.218420000 | 0.932760000  | -0.790683000 |
| C | -2.631752000 | 1.074491000  | -0.819014000 |
| H | -0.652305000 | 1.842310000  | -0.990355000 |
| N | -1.023701000 | -1.394388000 | -0.119530000 |
| H | -2.956978000 | 2.119736000  | -0.892680000 |
| C | 0.992796000  | -0.040375000 | -0.179611000 |
| C | 1.535931000  | 1.127809000  | 0.391276000  |
| C | 1.861928000  | -1.092917000 | -0.532227000 |
| C | 2.910753000  | 1.238436000  | 0.601269000  |
| C | 3.237436000  | -0.974332000 | -0.328094000 |
| C | 3.765088000  | 0.189827000  | 0.240917000  |
| H | 0.874161000  | 1.939006000  | 0.700181000  |
| H | 1.469443000  | -1.997563000 | -1.003021000 |
| H | 3.316450000  | 2.144261000  | 1.057538000  |
| H | 3.899815000  | -1.792193000 | -0.620533000 |
| H | 4.841466000  | 0.279088000  | 0.405855000  |
| C | -3.652994000 | 0.146854000  | -0.635294000 |
| H | -4.684215000 | 0.502522000  | -0.713875000 |
| H | -3.524944000 | -0.914777000 | -0.868737000 |
| H | -3.339739000 | -0.070632000 | 0.795172000  |
| H | -0.380096000 | -2.142446000 | 0.127088000  |
| O | -2.903144000 | -0.526436000 | 1.804118000  |
| H | -2.604104000 | 0.179812000  | 2.407714000  |
| H | -2.097254000 | -1.000557000 | 1.465034000  |
| H | -1.780789000 | -1.722414000 | -0.715288000 |

**TS1'-H: G= -595.106017**

|   |              |              |              |
|---|--------------|--------------|--------------|
| C | -0.054645000 | -0.516066000 | 0.424340000  |
| C | -0.778197000 | -1.392869000 | -0.387711000 |
| C | -2.141862000 | -1.746623000 | -0.335755000 |
| H | -0.200090000 | -1.870309000 | -1.178424000 |
| N | -0.585812000 | 0.148028000  | 1.481255000  |
| H | -2.431737000 | -2.442555000 | -1.132992000 |
| C | 1.370473000  | -0.234288000 | 0.122403000  |
| C | 1.803669000  | -0.078708000 | -1.208550000 |
| C | 2.311002000  | -0.118440000 | 1.165083000  |
| C | 3.144215000  | 0.190804000  | -1.486777000 |
| C | 3.652933000  | 0.139634000  | 0.880845000  |
| C | 4.072225000  | 0.297940000  | -0.444507000 |
| H | 1.082102000  | -0.140251000 | -2.025286000 |
| H | 2.005171000  | -0.267289000 | 2.203654000  |
| H | 3.464835000  | 0.323655000  | -2.522558000 |
| H | 4.374471000  | 0.210517000  | 1.697857000  |
| H | 5.122093000  | 0.504784000  | -0.665333000 |
| C | -3.209874000 | -1.301018000 | 0.455585000  |
| H | -4.132967000 | -1.888735000 | 0.406300000  |
| H | -3.056318000 | -0.810683000 | 1.422283000  |
| H | -3.579400000 | -0.170182000 | -0.302227000 |
| H | 0.033301000  | 0.680252000  | 2.086059000  |
| O | -3.905814000 | 0.895304000  | -0.836565000 |

|   |              |              |              |
|---|--------------|--------------|--------------|
| H | -3.793673000 | 0.784855000  | -1.796410000 |
| H | -3.189820000 | 1.558234000  | -0.529252000 |
| H | -1.416153000 | -0.212524000 | 1.940361000  |
| H | -1.449786000 | 1.810681000  | 0.572052000  |
| O | -2.022015000 | 2.401742000  | 0.045579000  |
| H | -2.328331000 | 3.074787000  | 0.673294000  |

**C-H:** G= -442.413769

|   |              |              |              |
|---|--------------|--------------|--------------|
| C | -0.806291000 | 0.427070000  | 0.219688000  |
| C | -1.701572000 | -0.598037000 | 0.738487000  |
| C | -2.984408000 | -0.822822000 | 0.365455000  |
| H | -1.248127000 | -1.277440000 | 1.462980000  |
| N | -1.269974000 | 1.608981000  | -0.113573000 |
| H | -3.480689000 | -1.653070000 | 0.881260000  |
| C | 0.629726000  | 0.151689000  | 0.094374000  |
| C | 1.068076000  | -1.169855000 | -0.134615000 |
| C | 1.581588000  | 1.190062000  | 0.191364000  |
| C | 2.426698000  | -1.439561000 | -0.287010000 |
| C | 2.938574000  | 0.910187000  | 0.051454000  |
| C | 3.362234000  | -0.402444000 | -0.192917000 |
| H | 0.341677000  | -1.979490000 | -0.222782000 |
| H | 1.269288000  | 2.211506000  | 0.419305000  |
| H | 2.757721000  | -2.462016000 | -0.479687000 |
| H | 3.670185000  | 1.715379000  | 0.143657000  |
| H | 4.427457000  | -0.618435000 | -0.303342000 |
| C | -3.808921000 | -0.151663000 | -0.679924000 |
| H | -4.359752000 | -0.911502000 | -1.256166000 |
| H | -4.577722000 | 0.480247000  | -0.198875000 |
| H | -3.232878000 | 0.471808000  | -1.377099000 |
| H | -0.683008000 | 2.310916000  | -0.559090000 |
| H | -2.228565000 | 1.881468000  | 0.086719000  |

## 5.- References

- [1] Krasovskiy, A.; Knochel, P. *Synthesis* **2006**, *5*, 890.
- [2] Gaussian 09, Revision D.01, Frisch, M. J.; Trucks, G. W.; Schlegel, H. B.; Scuseria, G. E.; Robb, M. A.; Cheeseman, J. R.; Scalmani, G.; Barone, V.; Mennucci, B.; Petersson, G. A.; Nakatsuji, H.; Caricato, M.; Li, X.; Hratchian, H. P.; Izmaylov, A. F.; Bloino, J.; Zheng, G.; Sonnenberg, J. L.; Hada, M.; Ehara, M.; Toyota, K.; Fukuda, R.; Hasegawa, J.; Ishida, M.; Nakajima, T.; Honda, Y.; Kitao, O.; Nakai, H.; Vreven, T.; Montgomery, J. A., Jr.; Peralta, J. E.; Ogliaro, F.; Bearpark, M.; Heyd, J. J.; Brothers, E.; Kudin, K. N.; Staroverov, V. N.; Kobayashi, R.; Normand, J.; Raghavachari, K.; Rendell, A.; Burant, J. C.; Iyengar, S. S.; Tomasi, J.; Cossi, M.; Rega, N.; Millam, J. M.; Klene, M.; Knox, J. E.; Cross, J. B.; Bakken, V.; Adamo, C.; Jaramillo, J.; Gomperts, R.; Stratmann, R. E.; Yazyev, O.; Austin, A. J.; Cammi, R.; Pomelli, C.; Ochterski, J. W.; Martin, R. L.; Morokuma, K.; Zakrzewski, V. G.; Voth, G. A.; Salvador, P.; Dannenberg, J. J.; Dapprich, S.; Daniels, A. D.; Farkas, Ö.; Foresman, J. B.; Ortiz, J. V.; Cioslowski, J.; Fox, D. J. Gaussian, Inc., Wallingford CT, 2009.
- [3] (a) Becke, A. D. *J. Chem. Phys.* **1993**, *98*, 5648; (b) Lee, C.; Yang, W.; Parr, R. G. *Phys. Rev. B* **1998**, *37*, 785; (c) Vosko, S. H.; Wilk, L.; Nusair, M. *Can. J. Phys.* **1980**, *58*, 1200.
- [4] Grimme, S.; Antony, J.; Ehrlich, S.; Krieg, H. *J. Chem. Phys.* **2010**, *132*, 154104.
- [5] Weigend, F.; Ahlrichs, R. *Phys. Chem. Chem. Phys.* **2005**, *7*, 3297.
- [6] (a) Miertuš, S.; Scrocco, E.; Tomasi, J. *Chem. Phys.* **1981**, *55*, 117; (b) Pascual-Ahuir, J. L.; Silla, E.; Tuñón, I. *J. Comp. Chem.* **1994**, *15*, 1127; (c) Barone, V.; Cossi, M. *J. Phys. Chem. A* **1998**, *102*, 1995.
- [7] McIver, J. W.; Komornicki, A. K. *J. Am. Chem. Soc.* **1972**, *94*, 2625.
- [8] González, C.; Schlegel, H. B. *J. Phys. Chem.* **1990**, *94*, 5523.
